# Supplementary material for: Prognosis of STEMI Patients with Multi-Vessel Disease Undergoing Culprit-Only PCI without Significant Residual Ischemia on Non-Invasive Stress Testing
Source: PLoS One. 2015 Sep 25;10(9):e0138474. doi: 10.1371/journal.pone.0138474 (PMC4583296; doi:10.1371/journal.pone.0138474)
Supplement: S1 File — (XLS) [file pone.0138474.s001.xls]

## Sheet: Sheet1
IDNO	DA_CAG	AGE	age_SCOR	SEX	Creatinine	HEIGHT	WEIGHT	GFR	rf123	RENALSCORE	MI_LOCATion	KILLIP	TIMECHESTPAINtoHOSPP	PrevPCI	PrevMI	CABG	Valvularsurgery	RFFAMILY	RFDM	RFHTN	SMOKING	HPL	CVA	PVD	NumVESSELDISEASE	@3vdSCORE	IRA_CUL	PRE_TIMI	POST_TIM	NO_REFLO	SUCSESPCI	@2B3AYN	LVEF	HOSLVEF1	@1YDEATH	MI_1Y	MACE1_1Y	@2YDEATH	MI_2Y	MACE_2Y	@3YDEATH	MI_3Y	MACE_3Y	Patient_Death_date	GROUP	MAXFU	FUDEATH	FUAMI	FUMACE
31042151	20.06.2010	52	0	1	1.06	176	80	77.9761	1	0	2	1	1	0	0	0	0	0	0	0	1	0	0	0	1	0	3	0	3	0	1	1	1	45	0	0	0	0	0	0	#NULL!	#NULL!	#NULL!	#NULL!	0	957	957	957	957
1442927	08.09.2009	68	2	1	0.9	160	78	89.1903	1	0	2	1	0.5	0	0	0	0	0	0	1	0	1	0	0	2	0	3	3	3	0	1	0	0	55	0	0	0	0	0	0	0	0	0	#NULL!	1	1242	1242	1242	1242
6501928	16.04.2009	56	0	1	0.89	175	100	93.9798	0	0	2	1	3	0	0	0	0	1	0	0	1	0	0	0	1	0	3	1	3	0	1	1	0	55	0	0	0	0	0	0	0	0	0	#NULL!	0	1387	1387	1387	1387
737875	07.07.2009	73	2	2	0.51	165	73	125.64	0	0	2	1	5	0	0	0	0	1	0	1	0	1	0	0	1	0	3	2	3	0	1	1	0	55	0	0	0	0	0	0	0	0	0	#NULL!	0	1305	1305	1305	1305
30778671	26.06.2010	50	0	1	1.05	168	72	79.4638	1	0	2	1	4	0	0	0	0	0	1	0	1	1	0	0	1	0	3	1	3	0	1	0	1	45	0	0	0	0	0	0	#NULL!	#NULL!	#NULL!	#NULL!	0	951	951	951	951
4288244	11.12.2010	65	0	1	1.1	178	92	71.4043	1	0	2	1	4	1	1	0	0	1	0	1	0	1	0	1	1	0	3	0	3	0	1	1	0	55	0	0	0	0	0	0	#NULL!	#NULL!	#NULL!	#NULL!	0	783	783	783	783
5883275	24.05.2009	44	0	1	0.63	188	106	147.046	0	0	2	1	2	1	1	0	0	1	0	1	1	1	0	0	1	0	3	0	3	0	1	1	2	35	0	0	0	0	0	0	0	0	0	#NULL!	0	1349	1349	1349	1349
5511190	18.10.2010	52	0	1	0.75	186	95	116.237	0	0	2	1	2	1	0	0	0	0	0	1	1	1	0	0	1	0	3	0	3	0	1	1	0	55	0	0	0	0	0	0	#NULL!	#NULL!	#NULL!	#NULL!	0	837	837	837	837
5861884	10.11.2010	47	0	1	1.25	170	95	65.8026	1	0	2	1	3	0	0	0	0	0	0	0	1	1	0	0	1	0	3	2	3	0	1	0	0	55	0	0	0	0	0	0	#NULL!	#NULL!	#NULL!	#NULL!	0	814	814	814	814
6807232	18.03.2010	47	0	1	1.06	182	104	79.5929	1	0	2	1	2	1	0	0	0	1	0	1	2	1	0	0	1	0	3	3	3	0	1	1	0	55	0	0	0	0	0	0				#NULL!	0	1051	1051	1051	1051
30865007	12.12.2008	57	0	1	0.67	165	97	129.951	0	0	2	1	8	0	0	0	0	0	0	1	1	1	0	0	1	0	3	0	3	0	1	1	0	55	0	0	0	0	0	0	0	0	0	#NULL!	0	1512	1512	1512	1512
132600	15.11.2010	61	0	2	0.83	168	85	74.2812	1	0	2	1	2	0	0	0	0	1	0	1	1	1	0	0	1	0	3	0	3	0	1	0	1	45	0	0	0	0	0	0	#NULL!	#NULL!	#NULL!	#NULL!	0	809	809	809	809
5540336	28.03.2009	50	0	1	1.01	185	90	83.1065	1	0	2	1	1.5	0	0	0	0	0	0	1	0	1	0	0	1	0	3	0	3	0	1	1	0	55	0	0	0	0	0	0	0	0	0	#NULL!	0	1406	1406	1406	1406
30668344	21.01.2010	47	0	1	0.68	165	85	132.85	0	0	2	1	6.5	0	0	0	0	1	0	0	1	0	0	0	1	0	3	0	3	0	1	1	2	35	0	0	0	0	0	0	0	0	0	#NULL!	0	1107	1107	1107	1107
32090606	13.09.2010	50	0	1	0.8	170	72	108.757	0	0	2	1	1	0	1	0	0	1	0	1	1	1	0	0	1	0	2	3	3	0	1	1	3	25	0	0	0	0	0	0	#NULL!	#NULL!	#NULL!	#NULL!	0	872	872	872	872
5355016	21.12.2008	53	0	1	1	186	110	83.0778	1	0	1	1	1	0	0	0	0	0	0	1	2	0	0	0	2	0	1	3	3	0	1	0	2	35	0	0	0	0	0	0	0	0	0	#NULL!	1	1503	1503	1503	1503
5677088	25.11.2009	49	0	1	1.36	185	115	59.1969	2	3	1	1	4	1	1	0	0	0	1	1	2	0	0	0	1	0	1	0	3	0	1	1	2	35	0	0	0	0	0	0	0	0	0	#NULL!	0	1164	1164	1164	1164
4208539	28.10.2009	61	0	1	0.77	176	70	109.164	0	0	1	1	2	1	0	0	0	0	0	0	0	1	0	0	1	0	1	0	3	0	1	1	2	35	0	0	0	0	0	0	0	0	0	#NULL!	0	1192	1192	1192	1192
6795144	26.11.2010	55	0	1	0.81	175	88	105.154	0	0	1	1	1.5	1	0	0	0	0	0	1	2	1	0	0	1	0	1	2	3	0	1	1	2	35	0	0	0	0	0	0	#NULL!	#NULL!	#NULL!	#NULL!	0	798	798	798	798
30922311	12.12.2009	79	2	2	0.8	160	60	73.5415	1	0	1	1	0.5	0	0	0	0	0	0	1	0	0	0	0	1	0	1	0	3	0	1	1	1	45	0	0	0	0	0	0	0	0	0	#NULL!	0	1147	1147	1147	1147
5659529	18.11.2010	50	0	1	0.81	178	75	107.209	0	0	1	1	3	0	0	0	0	1	0	1	2	0	0	0	1	0	1	0	3	0	1	1	2	35	0	0	0	0	0	0	#NULL!	#NULL!	#NULL!	#NULL!	0	806	806	806	806
31050396	11.03.2010	76	2	1	1.4	165	67	52.3692	2	3	1	1	6.5	0	0	0	0	0	0	0	0	0	0	0	1	0	1	2	3	0	1	0	2	35	0	0	0	0	0	0				#NULL!	0	1058	1058	1058	1058
31297126	03.07.2009	62	0	1	0.7	175	105	121.455	0	0	1	1	1	0	0	0	0	0	0	0	0	1	0	0	1	0	1	0	3	0	1	1	3	25	0	0	0	0	0	0	0	0	0	#NULL!	0	1309	1309	1309	1309
5117183	19.09.2010	58	0	1	1.14	172	72	70.1244	1	0	1	1	5	1	0	0	0	0	0	1	1	1	0	0	1	0	1	3	3	0	1	1	0	55	0	0	0	0	0	0	#NULL!	#NULL!	#NULL!	#NULL!	0	866	866	866	866
6373584	20.02.2010	55	0	1	0.91	175	87	91.936	0	0	1	1	2	0	0	0	0	0	1	1	2	1	0	0	1	0	1	1	3	0	1	1	2	35	0	0	0	0	0	0				#NULL!	0	1077	1077	1077	1077
5797823	04.12.2009	47	0	2	0.7	170	72	95.3318	0	0	1	1	1.25	0	0	0	0	1	0	0	1	0	0	0	1	0	1	0	3	0	1	1	2	35	0	0	0	0	0	0	0	0	0	#NULL!	0	1155	1155	1155	1155
378269	18.07.2010	73	2	1	1.1	168	68	69.7415	1	0	1	1	1.5	0	0	0	0	0	0	0	0	0	0	0	1	0	1	3	3	0	1	0	0	60	0	0	0	0	0	0	#NULL!	#NULL!	#NULL!	#NULL!	0	929	929	929	929
4228261	16.11.2009	63	0	1	0.95	172	75	85.1047	1	0	1	1	2.5	0	0	0	0	1	0	0	0	0	0	0	3	2	1	0	3	0	1	1	2	35	0	0	0	0	0	0	0	0	0	#NULL!	1	1173	1173	1173	1173
587	05.11.2009	70	2	2	0.64	150	56	97.5058	0	0	1	1	6	0	0	0	0	0	1	1	0	1	0	0	1	0	1	0	3	0	1	0	3	25	0	0	0	0	0	0	0	0	0	#NULL!	0	1184	1184	1184	1184
30896507	01.10.2010	62	0	2	0.51	155	59	129.875	0	0	1	1	3.5	0	0	0	0	1	0	0	2	0	0	0	1	0	1	2	3	0	1	0	2	35	0	0	0	0	0	0	#NULL!	#NULL!	#NULL!	#NULL!	0	854	854	854	854
880102	12.12.2010	67	2	1	0.86	174	72	94.2776	0	0	1	1	2	1	0	0	0	0	0	1	0	1	0	0	1	0	1	3	3	0	1	1	2	35	0	0	0	0	0	0	#NULL!	#NULL!	#NULL!	#NULL!	0	782	782	782	782
2439112	05.08.2010	41	0	1	0.99	180	70	88.5431	1	0	1	1	1	1	0	0	0	1	0	0	1	0	0	0	1	0	1	0	3	0	1	1	1	45	0	0	0	0	0	0	#NULL!	#NULL!	#NULL!	#NULL!	0	911	911	911	911
4287387	29.03.2010	60	0	1	1.01	160	56	80.0869	1	0	1	1	8	0	0	0	0	0	0	0	0	0	0	0	1	0	1	0	3	0	1	1	1	45	0	0	0	0	0	0	#NULL!	#NULL!	#NULL!	#NULL!	0	1040	1040	1040	1040
5346670	09.10.2010	55	0	1	0.92	168	64	90.7838	0	0	1	1	0.5	0	0	0	0	0	1	0	1	1	0	1	1	0	1	0	3	0	1	1	2	35	0	0	0	0	0	0	#NULL!	#NULL!	#NULL!	#NULL!	0	846	846	846	846
31942400	29.03.2009	52	0	1	0.86	190	92	99.2552	0	0	1	1	1.5	0	0	0	0	0	0	0	0	0	0	0	2	0	1	2	3	0	1	1	2	35	0	0	0	0	0	0	0	0	0	#NULL!	1	1405	1405	1405	1405
5561151	29.11.2008	49	0	1	0.76	172	75	115.863	0	0	1	4	4	0	0	0	0	1	0	0	1	1	0	0	1	0	1	3	3	0	1	1	2	35	0	0	0	0	0	0	0	0	0	#NULL!	0	1525	1525	1525	1525
46483	04.01.2008	88	2	2	1.11	150	65	49.5036	2	3	1	3	6	0	0	0	0	0	0	1	0	1	0	0	1	0	4	2	3	0	1	0	0	55	0	0	0	0	0	0	0	0	0	#NULL!	0	1855	1855	1855	1855
811952	16.12.2003	60	0	2	0.6	165	74	108.384	0	0	2	3	3.5	0	0	0	0	1	0	0	2	1	0	0	1	0	3	0	3	0	1	1	0	45	0	0	0	0	0	0	0	0	0	#NULL!	0	3335	3335	3335	3335
5360924	03.09.2006	50	0	1	0.99	175	100	85.047	1	0	3	3	2.5	0	0	0	0	1	0	0	1	0	0	0	3	2	2	1	3	1	1	1	2	35	0	0	0	0	0	0	0	0	0	#NULL!	1	2343	2343	2343	2343
56578	20.08.2010	60.5	0	1	0.8	180	105	104.629	0	0	2	3	2	0	0	0	0	1	0	1	1	1	0	0	1	0	2	0	3	0	1	0	0	55	0	0	0	0	0	0	0	0	0	#NULL!	0	896	896	896	896
804466	26.10.2002	77	2	2	1.01	#NULL!	#NULL!	56.4901	2	3	3	3	40	0	0	0	0	0	0	0	0	1	0	0	1	0	2	0	2	0	0	1	1	48	0	0	0	0	0	0	0	0	0	#NULL!	0	3751	3751	3751	3751
5585736	24.12.2003	43	0	1	1.1	192	120	77.6518	1	0	1	3	1	0	0	0	0	1	0	0	0	0	0	0	1	0	1	0	3	0	1	1	1	45	0	0	0	0	0	0	0	0	0	#NULL!	0	3327	3327	3327	3327
30660449	21.01.2003	73	2	2	0.7	170	80	87.1805	1	0	1	3	1	0	0	0	0	0	1	0	0	0	0	0	1	0	1	0	3	0	1	0	2	30	0	0	0	0	0	0	0	0	0	20.10.2006	0	3664	1368	3664	1368
734432	25.04.2009	90	2	2	0.6	160	70	99.8203	0	0	1	3	6	0	0	0	0	0	1	1	0	0	0	0	1	0	1	2	2	1	1	0	3	25	0	0	0	0	0	0	0	0	0	19.06.2012	0	1378	1151	1378	1151
1158745	18.07.2010	54	0	1	0.65	175	74	136.061	0	0	1	3	1	0	0	0	0	0	0	0	0	1	0	0	1	0	1	2	3	0	1	1	2	40	0	0	0	0	0	0	0	0	0	#NULL!	0	929	929	929	929
6723074	11.06.2009	64	0	1	1.01	172	80	79.0445	1	0	1	3	9	0	0	0	0	0	1	1	1	1	0	0	2	0	1	0	2	1	1	1	3	25	0	0	0	0	0	0	0	0	0	#NULL!	1	1331	1331	1331	1331
2609854	10.07.2004	67	2	2	0.9	155	87	66.3786	1	0	1	3	4	0	0	0	0	0	0	1	0	1	0	0	1	0	1	0	2	0	0	1	3	25	0	0	0	0	0	0	0	0	0	#NULL!	0	3128	3128	3128	3128
1276796	31.01.2007	69	2	2	0.49	160	65	133.09	0	0	1	3	0.5	0	0	0	0	0	0	1	0	1	0	0	2	0	1	3	3	0	1	0	0	55	0	0	0	0	0	0	0	0	0	#NULL!	1	2193	2193	2193	2193
4639356	17.12.2006	60	0	1	1.12	170	100	71.0805	1	0	1	3	4	0	0	0	0	1	0	0	0	0	0	0	3	2	1	0	3	0	1	0	3	25	0	0	0	0	0	0	0	0	0	#NULL!	1	2238	2238	2238	2238
32211189	13.08.2002	48	0	1	1.9	172	72	40.4147	2	3	1	3	2.5	0	0	0	0	0	0	0	1	0	0	0	2	0	1	0	3	0	1	1	3	25	0	0	0	0	0	0	0	0	0	26.06.2006	1	3825	1413	3825	1413
726763	29.09.2005	77	2	2	0.85	160	60	68.9302	1	0	1	3	1.5	0	0	0	0	1	1	1	0	0	0	0	1	0	1	3	3	0	1	1	1	40	0	0	0	0	0	0	0	0	0	#NULL!	0	2682	2682	2682	2682
6886490	17.05.2003	45	0	1	0.8	170	95	111.108	0	0	1	3	2	0	0	0	0	1	0	1	0	1	0	0	3	2	1	0	3	0	1	0	2	30	0	0	0	0	0	0	0	0	0	#NULL!	1	3548	3548	3548	3548
4245094	22.01.2002	74	2	2	0.7	155	60	86.94	1	0	1	3	2	0	0	0	0	0	0	0	1	0	0	0	1	0	1	2	3	0	1	1	1	35	0	1	1	0	1	1	0	1	1	#NULL!	0	4028	4028	79	77
6482842	17.07.2003	56	0	1	1.1	168	54	73.5976	1	0	1	2	2.5	0	0	0	0	0	0	0	0	0	0	0	3	2	5	0	3	1	1	1	2	30	0	0	0	0	0	0	0	0	0	#NULL!	1	3487	3487	3487	3487
6773431	16.08.2003	72	2	1	0.9	160	70	88.1614	1	0	2	2	1	0	0	0	0	0	1	1	1	0	0	0	1	0	3	0	3	0	1	0	0	50	0	0	0	0	0	0	0	0	0	#NULL!	0	3457	3457	3457	3457
1227792	08.03.2004	65	0	1	1	174	100	79.7061	1	0	2	2	1.5	0	0	0	0	0	1	1	1	0	1	1	2	0	3	0	3	0	1	0	0	55	0	0	0	0	0	0	0	0	0	#NULL!	1	3252	3252	3196	3196
938770	14.03.2002	52	0	1	1	#NULL!	#NULL!	83.3997	1	0	2	2	1	1	0	0	0	0	1	1	0	1	0	0	1	0	3	3	3	0	1	1	1	45	0	0	0	0	0	0	0	0	0	#NULL!	0	3977	3977	3977	3977
32328577	16.11.2007	51	0	1	1.12	172	65	73.4647	1	0	2	2	2	0	0	0	0	0	0	0	1	0	0	0	1	0	3	0	3	0	1	1	0	55	0	0	0	0	0	0	0	0	0	#NULL!	0	1904	1904	1904	1904
493822	08.04.2004	83	2	1	1	164	68	75.8473	1	0	2	2	4	0	0	0	0	0	0	1	0	0	0	0	3	2	3	0	3	0	1	0	1	45	0	0	0	0	0	0	0	0	0	#NULL!	1	3221	3221	3221	3221
5592098	02.08.2003	44	0	1	0.8	170	110	111.616	0	0	2	2	2	1	0	0	0	0	0	1	1	1	0	0	2	0	3	0	0	0	0	1	1	42	0	0	0	0	0	0	0	0	0	#NULL!	1	3471	3471	3471	3471
7401111	22.12.2002	67	2	1	0.7	170	70	119.557	0	0	2	2	1.5	0	0	0	0	0	0	0	2	1	0	0	1	0	3	2	3	0	1	1	2	25	0	0	0	0	0	0	0	0	0	#NULL!	0	3694	3694	3694	3694
1345242	25.10.2003	75	2	1	1.2	167	86	62.7336	1	0	2	2	1	0	0	0	0	0	0	1	0	0	0	0	3	2	3	0	3	0	1	1	0	45	0	0	0	0	0	0	0	0	0	#NULL!	1	3387	3387	3387	3387
922438	16.02.2004	55	0	1	1.1	175	85	73.8673	1	0	2	2	2	0	0	0	0	1	0	0	1	1	0	0	2	0	3	0	3	0	1	1	0	55	0	0	0	0	0	0	0	0	0	#NULL!	1	3273	3273	3273	3273
32721512	18.05.2004	60	0	1	0.7	172	83	122.266	0	0	2	2	0.5	0	0	0	0	0	0	0	1	0	0	0	1	0	3	1	3	0	1	1	2	30	0	0	0	0	0	0	0	0	0	#NULL!	0	3181	3181	3181	3181
7076663	01.03.2006	65	0	1	1.23	165	95	62.7684	1	0	2	2	2.5	0	0	0	0	1	0	0	0	1	0	0	2	0	3	0	3	0	1	1	0	55	0	0	0	0	0	0	0	0	0	#NULL!	1	2529	2529	2529	2529
1732733	24.05.2009	42	0	1	8.5	197	95	7.3696	3	3	2	2	2	0	0	0	0	0	0	1	1	0	0	0	1	0	3	0	3	0	1	0	2	35	0	0	0	0	0	0	0	0	0	#NULL!	0	1349	1349	1349	1349
7299513	02.11.2006	72	2	1	1.04	170	74	74.6136	1	0	2	2	3.5	0	0	0	0	0	0	0	1	1	0	0	1	0	3	0	3	0	1	1	1	45	0	0	0	0	0	0	0	0	0	#NULL!	0	2283	2283	2283	2283
32196037	08.04.2003	66	2	1	0.9	166	66	89.7325	1	0	2	2	2	0	0	0	0	1	0	1	1	0	0	0	1	0	3	0	3	0	1	1	1	45	0	0	0	0	0	0	0	0	0	#NULL!	0	3587	3587	3587	3587
30676626	04.04.2004	60	0	1	0.7	158	58	122.266	0	0	2	2	15	0	0	0	0	0	0	1	0	0	0	0	1	0	3	0	3	0	1	1	1	45	0	0	0	0	0	0	0	0	0	#NULL!	0	3225	3225	3225	3225
5219029	06.06.2002	49	0	1	0.7	184	90	127.397	0	0	2	2	1	0	0	0	0	0	0	0	1	1	0	0	1	0	3	0	3	0	1	0	0	50	0	0	0	0	0	0	0	0	0	#NULL!	0	3893	3893	3893	3893
32369759	05.04.2004	53	0	1	0.7	160	60	125.384	0	0	2	2	3	0	0	0	0	0	0	0	1	0	0	0	1	0	3	0	3	0	1	0	0	45	0	0	0	0	0	0	0	0	0	#NULL!	0	3224	3224	3224	3224
32183422	15.04.2010	86	2	2	0.59	165	93	102.719	0	0	2	2	1	1	0	0	0	0	0	1	0	1	0	0	1	0	3	0	3	0	1	0	2	35	0	0	0	0	0	0	0	0	0	#NULL!	0	1023	1023	1023	1023
6589079	01.04.2004	57	0	1	0.9	165	78	92.4431	0	0	2	2	2.5	0	0	0	0	0	0	1	2	0	0	0	1	0	3	0	3	0	1	1	2	30	0	0	0	0	0	0	0	0	0	#NULL!	0	3228	3228	3228	3228
30735265	06.10.2005	64	0	1	1.15	164	84	68.0476	1	0	2	2	2	0	0	0	0	1	1	1	2	1	1	0	3	2	3	0	3	0	1	1	1	45	0	0	0	0	0	0	0	0	0	#NULL!	1	2675	2675	2675	2675
3026822	10.05.2002	52	0	1	1	167	95	83.3997	1	0	2	2	4.5	0	0	0	0	0	0	0	1	0	0	1	1	0	2	3	3	0	1	1	1	50	0	0	1	0	0	1	0	0	1	#NULL!	0	3920	3920	3920	412
6431924	15.04.2003	65	0	1	0.6	165	65	143.716	0	0	2	2	3	0	0	0	0	0	0	0	1	0	0	0	1	0	2	0	3	0	1	1	2	30	0	1	1	0	1	1	0	1	1	#NULL!	0	3580	3580	458	458
133438	29.09.2002	75	2	1	1.3	165	70	57.1985	2	3	3	2	2	0	0	0	0	1	1	0	0	0	1	0	1	0	2	2	3	0	1	1	1	45	0	0	0	0	0	0	0	0	0	#NULL!	0	3778	3778	3778	3778
21766	15.12.2003	57	0	1	1	170	105	81.8597	1	0	2	2	2.5	0	0	0	0	1	0	0	1	1	0	0	1	0	2	0	3	0	1	1	1	45	0	0	0	0	0	0	0	0	0	#NULL!	0	3336	3336	3336	3336
5597571	17.03.2009	49	0	1	0.73	187	120	121.375	0	0	2	2	3	0	0	0	0	0	1	0	0	1	0	0	2	0	2	0	3	0	1	1	1	45	0	0	0	0	0	0	0	0	0	#NULL!	1	1417	1417	1417	1417
178106	14.10.2004	76	2	1	0.8	180	80	99.8946	0	0	2	2	#NULL!	0	0	0	0	1	0	1	0	0	0	0	1	0	2	0	3	0	1	1	1	42	0	0	0	0	0	0	0	0	0	#NULL!	0	3032	3032	3032	3032
1025933	23.12.2002	54	0	1	0.9	180	130	93.4633	0	0	2	2	1	0	0	0	0	1	0	0	0	1	0	0	1	0	2	0	3	0	1	0	0	50	0	0	0	0	0	0	0	0	0	#NULL!	0	3693	3693	3693	3693
6425120	10.02.2002	60	0	2	1.1	160	60	53.8499	2	3	1	2	2	0	0	0	0	1	0	1	1	1	0	0	1	0	1	2	3	0	1	0	2	35	0	0	1	0	0	1	0	0	1	#NULL!	0	4009	4009	4009	246
5155966	08.02.2003	51	0	1	0.9	169	78	94.5541	0	0	1	2	6.5	0	0	0	0	0	0	0	0	0	0	0	1	0	1	2	3	0	1	1	1	45	0	0	1	0	0	0	0	0	1	#NULL!	0	3646	3646	3646	625
5361058	22.05.2003	47	0	1	1.1	190	101	76.2623	1	0	1	2	9	0	0	0	0	0	0	0	0	1	0	0	1	0	1	0	3	0	1	1	2	35	0	0	0	0	0	0	0	0	1	#NULL!	0	3543	3543	3543	1078
7483792	26.03.2004	85	2	2	1	160	75	56.0073	2	3	1	2	#NULL!	0	0	0	0	0	0	1	0	0	0	0	1	0	1	0	3	0	1	0	2	30	0	1	1	0	1	1	0	1	1	#NULL!	0	3234	3234	350	350
4227375	22.07.2003	79	2	1	1.2	170	80	62.0754	1	0	1	2	1	1	0	0	0	1	0	1	0	0	0	0	1	0	1	0	3	0	1	0	2	35	0	0	0	0	0	1	0	0	1	#NULL!	0	3482	3482	3482	986
1425261	23.02.2004	56	0	1	0.8	165	64	106.283	0	0	1	2	1	0	0	0	0	0	0	1	1	0	0	0	3	2	1	3	3	0	1	1	2	30	0	0	1	0	0	1	0	0	1	#NULL!	1	3266	3266	3266	252
3889888	11.03.2002	53	0	1	1.16	170	86	70.0004	1	0	1	2	1.25	0	0	0	0	0	0	0	0	0	0	0	1	0	1	0	3	1	1	1	0	60	0	0	0	0	0	0	0	0	0	#NULL!	0	3980	3980	3980	3980
31200038	03.02.2002	69	2	2	1	160	72	58.4293	2	3	1	2	3	0	0	0	0	1	1	1	0	0	0	0	1	0	1	0	3	0	1	1	2	25	0	0	0	0	0	0	0	0	0	#NULL!	0	4016	4016	4016	4016
4580181	02.06.2000	69	2	1	#NULL!	#NULL!	#NULL!	#NULL!	#NULL!	#NULL!	1	2	3	0	0	0	0	0	0	1	1	0	0	0	1	0	1	1	3	0	1	0	1	30	0	0	0	0	0	0	0	0	0	#NULL!	0	4627	4627	4627	4627
902564	29.12.2007	73	2	1	1.7	170	175	42.2008	2	3	1	2	4	0	0	0	0	1	0	1	0	1	0	0	1	0	1	0	3	0	1	1	2	25	0	0	0	0	0	0	0	0	0	#NULL!	0	1861	1861	1861	1861
884427	19.12.2004	70	2	1	0.94	168	63	84.3274	1	0	1	2	1.5	0	0	0	0	1	0	0	0	0	0	0	1	0	1	1	3	0	1	1	0	50	0	0	0	0	0	0	0	0	0	#NULL!	0	2966	2966	2966	2966
3064701	11.05.2003	74	2	1	1.33	#NULL!	61	55.8643	2	3	1	2	4	0	0	0	0	1	0	1	0	1	0	0	1	0	1	1	3	1	1	1	2	30	0	0	0	0	0	0	0	0	0	#NULL!	0	3554	3554	3554	3554
493743	11.06.2008	87	2	1	1.46	170	90	48.5431	2	3	1	2	1.5	0	0	0	0	0	0	1	0	1	0	1	1	0	1	2	3	0	1	0	1	45	0	0	0	0	0	0	0	0	0	#NULL!	0	1696	1696	1696	1696
30372425	05.09.2002	42	0	1	0.9	170	75	98.3552	0	0	1	2	8	0	0	0	0	0	0	0	1	0	0	0	1	0	1	0	3	0	1	1	2	30	0	0	0	0	0	0	0	0	0	#NULL!	0	3802	3802	3802	3802
30758529	01.12.2003	40	0	1	2.3	182	74	33.6404	2	3	1	2	1	0	0	0	0	0	0	1	0	0	0	0	2	0	1	2	3	0	1	1	3	25	0	0	0	0	0	0	0	0	0	#NULL!	1	3350	3350	3350	3350
5126727	12.01.2004	51	0	1	0.7	180	90	126.367	0	0	3	2	12	0	0	0	0	0	0	0	1	0	0	0	1	0	1	0	3	0	1	1	0	50	0	0	0	0	0	0	0	0	0	#NULL!	0	3308	3308	3308	3308
31063223	09.11.2006	58	0	2	0.62	160	70	105.08	0	0	1	2	4	0	0	0	0	1	0	1	0	1	0	0	1	0	1	2	3	0	1	1	2	35	0	0	0	0	0	0	0	0	0	#NULL!	0	2276	2276	2276	2276
4428572	05.06.2007	87	2	2	0.79	160	64	73.4658	1	0	1	2	4	0	0	0	0	0	0	1	0	1	0	0	1	0	1	0	3	0	1	0	2	35	0	0	0	0	0	0	0	0	0	#NULL!	0	2068	2068	2068	2068
1118054	18.03.2004	64	0	2	1.4	160	60	40.2375	2	3	1	2	16	0	0	0	0	0	0	0	1	0	0	0	1	0	1	0	2	1	0	1	3	25	0	0	0	0	0	0	0	0	0	#NULL!	0	3242	3242	3242	3242
32087630	12.07.2004	70	2	1	1.2	172	93	63.6184	1	0	1	2	7	0	0	0	0	0	1	1	0	0	0	0	1	0	1	2	3	0	1	1	0	45	0	0	0	0	0	0	0	0	0	#NULL!	0	3126	3126	3126	3126
568093	28.08.2006	63	0	1	0.76	170	75	110.1	0	0	1	2	10	0	0	0	0	0	1	0	2	0	0	0	3	2	1	2	2	0	0	1	1	45	0	0	0	0	0	0	0	0	0	#NULL!	1	2349	2349	2349	2349
4585451	17.11.2005	74	2	1	0.99	172	72	78.5409	1	0	1	2	2	0	0	0	0	0	0	1	2	1	0	0	3	2	1	1	2	1	0	1	3	25	0	0	0	0	0	0	0	0	0	#NULL!	1	2633	2633	2633	2633
94717034	13.02.2003	39	0	1	0.9	180	110	99.8461	0	0	1	2	24	0	0	0	0	1	1	0	1	1	0	0	1	0	1	0	3	0	1	0	2	30	0	0	0	0	0	0	0	0	0	#NULL!	0	3641	3641	3641	3641
980690	06.06.2003	70	2	1	#NULL!	170	70	#NULL!	#NULL!	#NULL!	1	2	2	0	0	0	0	0	0	0	2	0	0	0	2	0	1	1	3	1	1	0	2	35	0	0	0	0	0	0	0	0	0	#NULL!	1	3528	3528	3528	3528
5423277	04.04.2003	48	0	1	0.8	190	80	109.662	0	0	1	2	5	0	0	0	0	0	0	0	2	0	0	0	1	0	1	0	3	0	1	1	3	20	0	0	0	0	0	0	0	0	0	#NULL!	0	3591	3591	3591	3591
5425806	24.10.2002	45	0	2	0.7	187	120	96.1771	0	0	1	2	1.5	0	0	0	0	0	0	1	1	0	0	0	1	0	1	0	3	0	1	1	2	30	0	0	0	0	0	0	0	0	0	#NULL!	0	3753	3753	3753	3753
857888	26.09.2008	60	0	2	0.57	175	110	115.458	0	0	1	2	3	0	0	0	0	1	1	1	2	0	0	0	1	0	1	3	3	0	1	0	2	35	0	0	0	0	0	0	0	0	0	#NULL!	0	1589	1589	1589	1589
203730	13.09.2001	77	2	1	1	#NULL!	#NULL!	77.0115	1	0	1	2	1	0	0	0	0	0	0	0	0	0	0	0	1	0	1	1	3	0	1	1	2	40	0	0	0	0	0	0	0	0	0	#NULL!	0	4159	4159	4159	4159
7380111	29.12.2002	74	2	2	1.5	164	80	36.0789	2	3	1	2	5	0	0	0	1	0	1	1	0	1	0	0	1	0	1	3	3	0	1	1	2	30	0	0	0	0	0	0	0	0	0	18.04.2009	0	3687	2302	3687	2302
31735482	18.10.2007	71	2	1	0.71	160	55	116.24	0	0	1	2	5	0	0	0	0	0	0	0	0	0	0	0	1	0	1	0	3	0	1	0	2	35	0	0	0	0	0	0	0	0	0	#NULL!	0	1933	1933	1933	1933
972702	22.09.2006	61	0	1	0.86	178	91	96.0903	0	0	1	2	2	0	0	0	0	0	0	1	0	0	0	0	2	0	1	2	3	0	1	1	0	55	0	0	0	0	0	0	0	0	0	#NULL!	1	2324	2324	2324	2324
4150906	04.12.2003	77	2	1	1.1	170	80	68.9903	1	0	1	2	2	0	0	0	0	0	0	1	0	1	0	0	1	0	1	0	3	0	1	0	2	35	0	0	0	0	0	0	0	0	0	#NULL!	0	3347	3347	3347	3347
5084571	23.05.2008	56	0	1	0.86	175	88	97.7731	0	0	1	2	2	1	1	0	0	1	1	1	1	1	1	0	1	0	1	0	3	0	1	1	0	55	0	0	0	0	0	0	0	0	0	#NULL!	0	1715	1715	1715	1715
522201	02.05.2003	77	2	1	1.45	168	70	50.1576	2	3	1	2	1.5	0	0	0	0	0	1	1	0	1	0	0	2	0	1	3	3	0	1	1	2	35	0	0	0	0	0	0	0	0	0	#NULL!	1	3563	3563	3563	3563
32207448	14.04.2003	39	0	1	0.7	170	75	133.439	0	0	1	2	1.5	1	0	0	0	0	0	0	1	0	0	0	1	0	1	3	3	0	1	1	2	30	0	0	0	0	0	0	0	0	0	#NULL!	0	3581	3581	3581	3581
5129659	28.11.2001	50	0	1	1	#NULL!	#NULL!	84.0663	1	0	1	2	2	0	0	0	0	1	0	0	1	1	0	0	1	0	1	0	3	0	1	1	2	20	0	0	0	0	0	0	0	0	0	#NULL!	0	4083	4083	4083	4083
6990049	23.02.2003	56	0	1	1.3	173	87	60.6932	1	0	1	2	1	0	0	0	0	1	0	1	0	1	0	0	1	0	1	2	2	0	0	1	3	25	0	0	0	0	0	0	0	0	0	#NULL!	0	3631	3631	3631	3631
6978744	26.11.2001	49	0	1	1	180	80	84.4118	1	0	2	2	2	0	0	0	0	0	0	0	0	1	0	0	1	0	2	0	3	0	1	1	0	45	0	1	1	0	1	1	0	1	1	#NULL!	0	4085	4085	140	140
5202632	15.06.2002	48	0	2	0.8	172	100	81.369	1	0	1	2	0	0	0	0	0	0	1	1	1	1	0	0	1	0	1	2	3	0	1	1	0	50	0	0	1	0	0	1	0	0	1	#NULL!	0	3884	3884	3884	197
257645	30.01.2005	76	2	1	1.17	#NULL!	#NULL!	64.4201	1	0	1	2	#NULL!	0	0	0	0	1	0	1	0	0	0	0	1	0	1	2	3	0	1	0	3	25	0	0	1	0	0	1	0	0	1	#NULL!	0	2924	2924	2924	81
5571085	09.10.2002	43	0	1	0.5	186	110	192.889	0	0	1	2	1	0	0	0	0	1	1	1	1	1	0	0	2	0	1	0	3	0	1	1	2	35	0	1	1	0	1	1	0	1	1	#NULL!	1	3768	3768	141	141
4220661	06.01.2002	65	0	1	1.2	#NULL!	#NULL!	64.5827	1	0	2	1	1	0	0	0	0	0	1	1	1	0	0	0	1	0	3	2	3	0	1	1	1	50	0	0	0	0	0	0	0	0	1	#NULL!	0	4044	4044	4044	1289
529294	23.02.2010	61	0	1	1.2	178	88	65.4208	1	0	2	1	0.5	0	0	0	0	1	0	0	1	1	0	0	2	0	3	0	3	0	1	1	0	60	0	0	1	0	0	1	0	0	1	#NULL!	1	1074	1074	1074	323
281800	14.01.2010	62	0	2	0.85	165	66	72.0297	1	0	2	1	3	0	0	0	0	1	0	1	1	0	0	0	1	0	3	0	3	0	1	1	1	45	0	0	0	0	1	1	0	1	1	#NULL!	0	1114	1114	731	731
5466815	18.03.2009	53	0	1	0.71	175	100	124.816	0	0	2	1	0.5	1	1	0	0	1	1	0	2	1	0	0	1	0	3	0	3	0	1	1	0	55	0	0	0	0	0	0	0	0	1	#NULL!	0	1416	1416	1054	1054
1106507	28.09.2007	57	0	1	0.88	182	102	94.8718	0	0	2	1	12	1	1	0	0	0	0	1	2	1	0	0	2	0	3	2	3	1	1	1	2	35	0	0	0	0	0	1	0	0	1	#NULL!	1	1953	1953	1953	671
5550386	17.04.2006	48	0	1	0.88	175	93	98.2399	0	0	2	1	1.5	0	0	0	0	0	1	1	0	1	0	0	3	2	3	3	3	0	1	1	1	45	0	0	0	0	0	1	0	0	1	#NULL!	1	2482	2482	2482	428
2701413	21.09.2010	53	0	1	0.83	75	165	103.007	0	0	2	1	4.5	1	0	0	0	0	0	1	1	0	0	0	1	0	3	0	3	0	1	1	0	55	0	0	0	0	0	0	0	0	1	#NULL!	0	864	864	864	808
1332895	19.05.2009	49	0	1	0.88	168	70	97.8296	0	0	2	1	10	0	0	0	0	1	0	0	1	0	0	0	3	2	3	0	3	0	1	1	0	55	0	0	1	0	0	1	0	0	1	#NULL!	1	1354	1354	1354	254
956929	27.07.2009	70	2	1	0.9	173	80	88.667	1	0	2	1	7	0	0	0	0	1	0	0	0	0	0	0	3	2	3	0	3	0	1	1	0	55	0	0	0	0	0	0	0	0	1	#NULL!	1	1285	1285	1285	1064
7446876	05.07.2007	60	0	1	1.5	159	84	50.7387	2	3	2	1	2	1	1	0	0	1	0	0	1	0	0	0	1	0	3	0	3	0	1	1	1	45	0	0	0	0	1	1	0	1	1	#NULL!	0	2038	2038	567	567
5578959	31.03.2010	50	0	1	0.56	165	63	164.139	0	0	2	1	5.5	0	0	0	0	1	0	0	1	1	0	0	1	0	3	0	3	0	1	0	1	45	0	0	1	0	0	1	0	0	1	#NULL!	0	1038	1038	1038	285
885792	10.02.2004	83	2	2	0.8	160	83	72.8078	1	0	2	1	2	0	1	0	0	0	1	1	1	1	0	0	3	2	3	2	3	0	1	1	0	55	0	0	0	0	0	0	0	1	1	#NULL!	1	3279	3279	1290	1290
5196399	14.01.2008	54	0	1	1.11	178	83	73.3727	1	0	2	1	1	0	0	0	0	0	0	0	0	1	0	0	1	0	3	1	3	0	1	1	0	55	0	0	0	0	0	0	0	0	1	#NULL!	0	1845	1845	1845	793
5252308	13.02.2003	49	0	1	1	168	72	84.4118	1	0	2	1	1.5	0	0	0	0	1	0	0	1	0	0	0	1	0	3	0	3	1	1	1	0	45	0	0	1	0	0	1	0	0	1	#NULL!	0	3641	3641	3641	108
3540728	17.01.2008	60	0	2	0.46	160	90	147.871	0	0	2	1	12	0	0	0	0	0	1	1	0	1	0	0	1	0	3	0	3	0	1	0	0	55	0	0	0	0	1	1	0	1	1	10.03.2011	0	1842	1148	389	389
4253129	01.07.2007	59	0	1	1.17	178	78	67.8178	1	0	2	1	5	0	0	0	0	1	0	1	2	1	0	0	2	0	3	0	3	0	1	1	2	35	0	0	1	0	0	1	0	0	1	#NULL!	1	2042	2042	2042	275
3541599	25.10.2005	63	0	1	0.88	170	70	92.9638	0	0	2	1	1	0	0	0	0	0	1	0	1	1	0	0	3	2	3	3	3	0	1	1	1	45	0	0	0	0	0	0	0	1	1	28.01.2010	1	2656	1556	966	966
2438549	03.10.2005	36	0	1	0.88	167	80	104.148	0	0	2	1	3	0	0	0	0	1	0	0	1	0	0	0	1	0	3	0	3	0	1	1	0	55	0	0	1	0	0	1	0	0	1	#NULL!	0	2678	2678	2678	342
3037405	24.02.2008	67	2	1	0.76	173	95	108.733	0	0	2	1	8	1	1	0	0	0	0	1	0	1	0	0	1	0	3	3	3	0	1	1	0	55	0	0	1	0	0	1	0	0	1	#NULL!	0	1804	1804	1804	225
31916880	05.11.2002	57	0	2	1.14	160	100	52.2163	2	3	2	1	1	0	0	0	0	0	1	1	0	1	1	0	1	0	3	0	3	0	1	1	0	45	0	0	1	0	0	1	0	0	1	#NULL!	0	3741	3741	3741	330
7212061	04.04.2007	74	2	2	0.72	158	48	84.4994	1	0	2	1	5	0	0	0	0	0	0	1	0	0	0	0	3	2	3	0	3	0	1	1	1	45	0	0	0	0	0	1	0	0	1	#NULL!	1	2130	2130	2130	578
6393346	24.04.2009	58	0	1	1.1	180	90	73.0752	1	0	2	1	0.5	0	0	0	0	0	0	0	1	1	0	0	1	0	3	0	3	0	1	1	0	55	0	0	1	0	0	1	0	0	1	#NULL!	0	1379	1379	1379	240
897957	02.10.2005	58	0	1	0.67	170	74	129.493	0	0	2	1	#NULL!	0	0	0	0	1	0	0	1	0	0	0	1	0	3	3	3	0	1	0	0	55	0	0	0	0	0	0	0	1	1	#NULL!	0	2679	2679	829	829
4290711	09.01.2003	56	0	1	0.82	160	79	103.297	0	0	2	1	1	0	0	0	0	0	0	0	1	1	0	0	2	0	3	0	2	1	0	1	0	50	0	0	0	0	0	0	0	0	1	#NULL!	1	3676	3676	3676	1063
5220452	16.03.2008	54	0	1	0.65	176	70	136.061	0	0	2	1	3	0	0	0	0	0	1	0	1	1	0	0	2	0	3	0	3	0	1	0	0	55	0	0	0	0	0	1	0	0	1	#NULL!	1	1783	1783	1783	630
410687	08.12.2006	73	2	1	1.1	170	67	69.7415	1	0	2	1	8	0	0	0	0	0	0	0	0	0	0	0	2	0	3	0	3	0	1	1	0	55	0	0	0	0	0	0	0	0	0	#NULL!	1	2247	2247	2247	2247
5004197	01.11.2000	50	0	1	#NULL!	#NULL!	#NULL!	#NULL!	#NULL!	#NULL!	2	1	5	0	0	0	0	0	0	0	0	0	0	0	1	0	3	1	3	0	1	0	#NULL!	#NULL!	0	0	0	0	0	0	0	0	0	#NULL!	0	4475	4475	1342	1342
6529612	19.12.2000	64	0	1	#NULL!	#NULL!	#NULL!	#NULL!	#NULL!	#NULL!	2	1	1.25	0	0	0	0	0	1	0	0	1	0	0	1	0	3	0	3	0	1	1	#NULL!	#NULL!	0	0	0	0	0	0	0	0	0	#NULL!	0	4427	4427	4427	4427
5570703	08.06.2001	42	0	1	0.7	#NULL!	#NULL!	131.447	0	0	2	1	1	0	0	0	0	0	0	0	1	1	0	0	3	2	3	0	3	0	1	1	2	30	0	0	0	0	0	0	0	0	0	#NULL!	1	4256	4256	4256	4256
41155	20.11.2000	67	2	2	#NULL!	#NULL!	#NULL!	#NULL!	#NULL!	#NULL!	2	1	10	0	0	0	0	0	0	1	1	0	0	0	1	0	3	0	3	0	1	1	2	30	0	0	0	0	0	0	0	0	0	06.02.2004	0	4456	1173	4456	1173
30432764	25.02.2000	45	0	1	1.1	#NULL!	#NULL!	76.9385	1	0	2	1	4	0	0	0	0	0	1	0	1	0	0	0	1	0	3	3	3	0	1	0	1	45	0	0	0	0	0	0	0	0	0	#NULL!	0	4725	4725	4725	4725
1562704	16.04.2001	45	0	1	1.2	#NULL!	#NULL!	69.5882	1	0	2	1	3	0	0	0	0	0	0	0	0	0	0	0	1	0	3	0	3	0	1	1	1	35	0	0	0	0	0	0	0	0	0	#NULL!	0	4309	4309	4309	4309
5438423	03.06.2001	44	0	1	0.9	#NULL!	#NULL!	97.4308	0	0	2	1	1.25	0	0	0	0	0	0	0	1	0	0	0	1	0	3	0	3	0	1	1	#NULL!	#NULL!	0	0	0	0	0	0	0	0	0	#NULL!	0	4261	4261	1854	1854
4209318	18.03.2001	64	0	2	0.8	#NULL!	#NULL!	76.7532	1	0	2	1	#NULL!	0	0	0	0	0	0	0	0	0	0	0	1	0	3	3	3	0	1	1	#NULL!	#NULL!	0	0	0	0	0	0	0	0	0	#NULL!	0	4338	4338	4338	4338
5502477	15.08.2003	45	0	1	0.9	77	175	96.9873	0	0	2	1	0.45	0	0	0	0	1	1	0	1	0	0	0	1	0	3	3	3	0	1	0	0	50	0	0	0	0	0	0	0	0	0	#NULL!	0	3458	3458	2502	2502
4155555	05.10.2005	73	2	1	1.12	#NULL!	80	68.3063	1	0	2	1	11	1	0	0	0	0	0	0	0	1	0	0	2	0	3	0	3	0	1	1	0	55	0	0	0	0	0	0	0	0	0	#NULL!	1	2676	2676	2676	1247
5727383	08.02.2004	74	2	1	1.1	176	74	69.5491	1	0	2	1	1.5	0	0	0	0	0	0	0	0	0	0	0	2	0	3	2	3	0	1	0	0	55	0	0	0	0	0	0	0	0	0	#NULL!	1	3281	3281	3281	3281
6434812	15.10.2007	69	2	2	0.94	155	70	63.0077	1	0	2	1	5	0	0	0	0	0	1	1	0	0	1	0	1	0	3	0	3	0	1	0	0	55	0	0	0	0	0	0	0	0	0	#NULL!	0	1936	1936	1936	1936
5447315	22.02.2008	51	0	1	0.73	185	80	120.393	0	0	2	1	2	0	0	0	0	0	0	0	1	1	0	0	1	0	3	0	3	0	1	1	0	55	0	0	0	0	0	0	0	0	0	#NULL!	0	1806	1806	1806	1806
30608784	17.10.2004	53	0	1	0.8	172	83	107.478	0	0	2	1	#NULL!	0	0	0	0	0	0	0	1	0	0	0	1	0	3	3	3	0	1	1	0	45	0	0	0	0	0	0	0	0	0	#NULL!	0	3029	3029	3029	3029
4588343	23.03.2004	68	2	1	0.7	167	90	119.198	0	0	2	1	1	0	0	0	0	0	0	0	2	0	0	0	2	0	3	1	3	0	1	1	1	45	0	0	0	0	0	0	0	0	0	#NULL!	1	3237	3237	3237	3237
7944723	05.12.2002	60	0	2	0.6	160	60	108.384	0	0	2	1	4	0	0	0	0	0	0	1	1	0	0	0	1	0	3	2	3	1	1	0	0	50	0	0	0	0	0	0	0	0	0	#NULL!	0	3711	3711	3711	3711
6891607	20.08.2009	48	0	1	0.96	174	85	88.8546	1	0	2	1	10	0	0	0	0	0	0	0	1	1	0	0	1	0	3	0	3	1	1	0	0	55	0	0	0	0	0	0	0	0	0	#NULL!	0	1261	1261	1261	1261
5712479	05.11.2009	48	0	1	1.09	176	82	76.7416	1	0	2	1	2	0	0	0	0	1	0	0	1	0	0	0	1	0	3	0	3	0	1	1	1	35	0	0	0	0	0	0	0	0	0	#NULL!	0	1184	1184	1184	1184
2601829	25.11.2004	63	0	2	0.71	160	78	88.3687	1	0	2	1	1	0	0	0	0	0	0	1	0	1	0	0	2	0	3	3	3	0	1	1	0	45	0	0	0	0	0	0	0	0	0	#NULL!	1	2990	2990	2990	2990
4246803	19.03.2003	65	0	1	0.7	178	63	120.295	0	0	2	1	2	0	0	0	0	0	0	0	1	0	0	0	1	0	3	2	3	0	1	1	0	45	0	0	0	0	0	0	0	0	0	#NULL!	0	3607	3607	3607	3607
6504260	19.11.2003	57	0	2	0.79	#NULL!	65	79.7283	1	0	2	1	1.5	0	0	0	0	1	0	0	1	1	0	0	1	0	3	0	3	0	1	1	2	35	0	0	0	0	0	0	0	0	0	#NULL!	0	3362	3362	3362	3362
2559189	14.09.2007	44	0	1	0.87	185	120	101.318	0	0	2	1	1	0	0	0	0	0	0	0	1	0	0	0	1	0	3	0	3	0	1	1	0	55	0	0	0	0	0	0	0	0	0	#NULL!	0	1967	1967	1967	1967
6886942	14.08.2003	82	2	1	0.6	176	82	137.095	0	0	2	1	2	0	0	0	0	0	0	0	0	0	0	0	2	0	3	0	3	0	1	1	1	35	0	0	0	0	0	0	0	0	0	#NULL!	1	3459	3459	3459	3459
1061158	14.01.2005	55	0	1	1.1	190	90	73.8673	1	0	2	1	0.5	0	0	0	0	0	0	0	2	0	0	0	1	0	3	0	3	0	1	1	0	60	0	0	0	0	0	0	0	0	0	#NULL!	0	2940	2940	2940	2940
5870733	06.11.2006	42	0	1	0.74	180	77	123.282	0	0	2	1	1	1	1	0	0	1	0	0	2	0	0	0	1	0	3	3	3	0	1	1	1	45	0	0	0	0	0	0	0	0	0	#NULL!	0	2279	2279	2279	2279
5476744	14.02.2007	49	0	1	0.78	170	70	112.441	0	0	2	1	2	0	0	0	0	1	0	0	0	1	0	1	1	0	3	2	3	0	1	1	0	55	0	0	0	0	0	0	0	0	0	#NULL!	0	2179	2179	2179	2179
3551852	21.04.2007	66	2	1	0.9	160	82	89.7325	1	0	2	1	1	0	0	0	0	0	0	1	0	0	0	0	2	0	3	3	3	0	1	1	1	45	0	0	0	0	0	0	0	0	0	#NULL!	1	2113	2113	2113	2113
1219024	03.08.2010	90	2	1	1.12	160	55	65.4642	1	0	2	1	0.5	0	0	0	0	0	0	1	0	0	0	0	1	0	3	0	3	0	1	0	1	45	0	0	0	0	0	0	0	0	0	#NULL!	0	913	913	913	913
74930	09.05.2008	58	0	1	1.06	170	68	76.2665	1	0	2	1	1	0	0	0	0	0	0	1	2	1	0	0	1	0	3	0	3	0	1	0	0	55	0	0	0	0	0	0	0	0	0	#NULL!	0	1729	1729	1729	1729
5474585	09.06.2010	53	0	1	0.74	168	85	117.596	0	0	2	1	2	0	0	0	0	0	0	0	1	1	0	0	1	0	3	2	3	0	1	0	1	45	0	0	0	0	0	0	0	0	0	#NULL!	0	968	968	968	968
464376	07.06.2004	76	2	2	0.7	162	62	86.8202	1	0	2	1	3	0	0	0	0	0	0	1	0	0	0	0	3	2	3	0	3	0	1	0	1	45	0	0	0	0	0	0	0	0	0	#NULL!	1	3161	3161	3161	3161
31705078	18.01.2009	81	2	1	1.01	165	60	75.3535	1	0	2	1	3	0	0	0	0	1	0	0	2	0	0	0	1	0	3	0	3	0	1	0	1	45	0	0	0	0	0	0	0	0	0	#NULL!	0	1475	1475	1475	1475
4886155	04.10.2006	66	2	1	0.88	157	53	92.09	0	0	2	1	4	0	0	0	0	0	1	0	1	1	0	1	1	0	3	1	3	1	1	1	2	35	0	0	0	0	0	0	0	0	0	#NULL!	0	2312	2312	2312	2312
32093760	29.09.2008	47	0	1	1.06	170	90	79.5929	1	0	2	1	7	0	0	0	0	1	0	1	1	1	0	0	2	0	3	3	3	0	1	0	0	55	0	0	0	0	0	0	0	0	0	#NULL!	1	1586	1586	1586	1586
684535	25.12.2006	69	2	1	0.92	174	94	86.6993	1	0	2	1	1.5	1	1	0	0	0	0	0	2	1	0	0	2	0	3	0	3	0	1	0	0	55	0	0	0	0	0	0	0	0	0	#NULL!	1	2230	2230	2230	2230
6965265	23.05.2004	53	0	2	0.8	153	56	79.7486	1	0	2	1	3	0	0	0	0	1	0	0	2	0	0	0	1	0	3	3	3	0	1	1	0	50	0	0	0	0	0	0	0	0	0	#NULL!	0	3176	3176	3176	3176
484571	14.01.2007	71	2	1	0.61	170	80	138.496	0	0	2	1	4	0	0	0	0	0	0	0	0	0	0	0	1	0	3	0	0	0	0	0	0	55	0	0	0	0	0	0	0	0	0	#NULL!	0	2210	2210	2210	2210
1266474	11.12.2005	70	2	1	0.74	180	90	111.139	0	0	2	1	#NULL!	1	0	0	0	0	0	1	0	1	0	0	1	0	3	0	3	0	1	1	0	55	0	0	0	0	0	0	0	0	0	#NULL!	0	2609	2609	2609	2609
5056848	09.01.2007	56	0	1	0.84	157	70	100.464	0	0	2	1	3.5	0	0	0	0	0	0	1	1	1	0	0	2	0	3	0	3	0	1	1	0	55	0	0	0	0	0	0	0	0	0	#NULL!	1	2215	2215	2215	2215
1493619	14.08.2005	49	0	2	0.45	160	87	157.398	0	0	2	1	1	0	0	0	0	0	0	1	0	0	0	0	1	0	3	0	3	0	1	0	2	35	0	0	0	0	0	0	0	0	0	#NULL!	0	2728	2728	2728	2728
1201408	22.03.2001	66	2	1	#NULL!	#NULL!	#NULL!	#NULL!	#NULL!	#NULL!	2	1	3	0	0	0	0	0	1	1	1	1	0	0	3	2	3	0	3	0	1	0	1	41	0	0	0	0	0	0	0	0	0	10.09.2009	1	4334	3094	4334	3094
30645511	01.05.2005	46	0	1	1.08	180	90	78.2352	1	0	2	1	0.5	0	0	0	0	0	0	0	1	1	0	0	1	0	3	2	3	0	1	1	0	55	0	0	0	0	0	0	0	0	0	#NULL!	0	2833	2833	2833	2833
30919477	10.04.2005	77	2	1	0.93	170	60	83.7387	1	0	2	1	2	0	0	0	0	0	0	0	1	0	0	1	1	0	3	0	3	0	1	1	1	45	0	0	0	0	0	0	0	0	0	#NULL!	0	2854	2854	2854	2854
1642997	22.10.2004	68	2	1	1.4	165	66	53.5651	2	3	2	1	1	0	0	0	0	0	0	1	0	1	0	0	3	2	3	2	3	0	1	1	0	50	0	0	0	0	0	0	0	0	0	#NULL!	1	3024	3024	3024	3024
1687852	11.03.2009	53	0	1	0.99	162	63	84.0469	1	0	2	1	1	0	0	0	0	0	0	1	1	0	0	0	1	0	3	3	3	0	1	1	2	35	0	0	0	0	0	0	0	0	0	#NULL!	0	1423	1423	1423	1423
5036466	12.10.2004	53	0	1	0.7	165	81	125.384	0	0	2	1	4	1	1	0	0	1	0	1	0	1	0	0	2	0	3	2	3	0	1	1	0	50	0	0	0	0	0	0	0	0	0	#NULL!	1	3034	3034	3034	3034
31720727	13.08.2005	69	2	1	0.73	#NULL!	80	113.228	0	0	2	1	0.5	0	0	0	0	0	0	0	0	1	0	0	1	0	3	3	3	0	1	0	0	55	0	0	0	0	0	0	0	0	0	#NULL!	0	2729	2729	2729	2729
5784519	12.04.2005	43	0	1	0.81	189	110	110.542	0	0	2	1	1.5	0	0	0	0	0	0	0	0	0	0	0	1	0	3	0	3	0	1	1	0	55	0	0	0	0	0	0	0	0	0	#NULL!	0	2852	2852	2852	2852
6555872	18.10.2007	62	0	1	0.99	165	70	81.4131	1	0	2	1	5	0	0	0	0	1	0	0	0	0	0	0	2	0	3	1	3	0	1	1	0	55	0	0	0	0	0	0	0	0	0	#NULL!	1	1933	1933	1933	1933
324584	17.11.2006	65	0	1	0.61	172	78	141.001	0	0	2	1	3	0	0	0	0	0	1	1	1	1	0	0	1	0	3	0	3	0	1	0	3	25	0	0	0	0	0	0	0	0	0	#NULL!	0	2268	2268	2268	2268
5183492	21.11.2008	55	0	1	0.98	174	67	84.4004	1	0	2	1	7	1	0	0	0	0	0	1	2	1	0	0	2	0	3	0	3	0	1	1	0	55	0	0	0	0	0	0	0	0	0	#NULL!	1	1533	1533	1533	1533
4290862	03.06.2009	63	0	1	0.9	168	68	90.5839	0	0	2	1	10	0	0	0	0	1	0	0	0	1	0	0	1	0	3	0	3	0	1	0	0	55	0	0	0	0	0	0	0	0	0	#NULL!	0	1339	1339	1339	1339
31710081	15.03.2008	59	0	2	0.73	174	90	116.884	0	0	2	1	3	0	0	0	0	0	0	0	1	0	0	0	1	0	3	0	3	0	1	1	1	45	0	0	0	0	0	0	0	0	0	#NULL!	0	1784	1784	1784	1784
30675099	10.10.2001	75	2	2	0.8	#NULL!	#NULL!	74.3213	1	0	2	1	3	0	0	0	0	0	0	0	0	1	0	0	1	0	3	0	2	1	0	1	2	38	0	0	0	0	0	0	0	0	0	#NULL!	0	4132	4132	4132	4132
30674411	20.08.2006	58	0	1	1.95	172	90	37.7431	2	3	2	1	14	0	0	0	0	0	1	0	1	0	0	1	1	0	3	2	3	0	1	1	0	55	0	0	0	0	0	0	0	0	0	#NULL!	0	2357	2357	2357	2357
31047651	04.09.2003	70	2	2	0.9	#NULL!	#NULL!	65.7909	1	0	2	1	4	0	0	0	0	0	0	1	0	0	0	0	1	0	3	0	3	0	1	0	0	45	0	0	0	0	0	0	0	0	0	#NULL!	0	3438	3438	3438	3438
7143215	23.03.2006	66	2	1	0.76	176	72	109.065	0	0	2	1	#NULL!	0	0	0	0	1	0	1	0	0	0	0	1	0	3	3	3	0	1	1	0	55	0	0	0	0	0	0	0	0	0	#NULL!	0	2507	2507	2507	2507
848882	06.03.2003	80	2	1	0.9	165	80	86.2958	1	0	2	1	2.5	0	0	0	0	1	0	0	1	0	0	0	2	0	3	2	3	0	1	1	0	45	0	0	0	0	0	0	0	0	0	#NULL!	1	3620	3620	3620	3620
7080073	03.07.2002	53	0	2	1	162	64	61.6437	1	0	2	1	3.5	0	0	0	0	1	0	0	0	0	0	0	2	0	3	0	3	0	1	1	0	45	0	0	0	0	0	0	0	0	0	#NULL!	1	3866	3866	3866	3866
30700350	26.05.2006	60	0	1	0.87	167	85	95.1356	0	0	2	1	2	0	0	0	0	1	0	1	1	0	0	0	1	0	3	0	3	0	1	1	2	35	0	0	0	0	0	0	0	0	0	#NULL!	0	2443	2443	2443	2443
1671184	18.08.2004	57	0	1	0.6	165	70	147.599	0	0	2	1	3	0	0	0	0	1	0	1	2	0	0	0	1	0	3	2	3	0	1	1	1	50	0	0	0	0	0	0	0	0	0	#NULL!	0	3089	3089	3089	3089
4386413	07.04.2008	74	2	1	0.68	165	74	121.156	0	0	2	1	2.5	0	0	0	0	0	0	1	2	0	0	0	3	2	3	0	3	0	1	0	0	55	0	0	0	0	0	0	0	0	0	#NULL!	1	1761	1761	1761	1761
4828881	14.03.2003	62	0	1	1	170	85	80.4743	1	0	2	1	11	0	0	0	0	0	0	0	1	1	0	0	1	0	3	0	3	0	1	1	2	30	0	0	0	0	0	0	0	0	0	#NULL!	0	3612	3612	3612	3612
5845282	01.08.2004	40	0	1	0.84	180	100	107.566	0	0	2	1	6	0	0	0	0	1	0	1	1	0	0	0	1	0	3	0	3	0	1	1	1	45	0	0	0	0	0	0	0	0	0	#NULL!	0	3106	3106	3106	3106
5293511	20.02.2002	48	0	1	0.9	170	55	95.7249	0	0	2	1	10	0	0	0	0	0	0	0	1	0	0	0	1	0	3	3	3	0	1	1	0	45	0	0	0	0	0	0	0	0	0	#NULL!	0	3999	3999	3999	3999
347003	14.07.2005	64	0	1	0.66	165	90	129.153	0	0	2	1	#NULL!	0	0	0	0	0	0	1	1	0	0	0	1	0	3	3	3	0	1	1	1	45	0	0	0	0	0	0	0	0	0	#NULL!	0	2759	2759	2759	2759
5469448	03.11.2005	48	0	1	0.75	170	97	118.141	0	0	2	1	4	0	0	0	0	0	1	1	1	1	0	0	1	0	3	0	3	0	1	1	0	55	0	0	0	0	0	0	0	0	0	#NULL!	0	2647	2647	2647	2647
381724	27.03.2007	61	0	1	1.05	171	81	76.32	1	0	2	1	3	0	0	0	0	0	0	1	0	1	0	0	1	0	3	3	3	0	1	1	0	55	0	0	0	0	0	0	0	0	0	#NULL!	0	2138	2138	2138	2138
847388	22.05.2009	65	0	1	1.06	170	80	74.5227	1	0	2	1	2	1	1	0	0	1	0	1	0	1	0	0	3	2	3	2	3	0	1	1	2	35	0	0	0	0	0	0	0	0	0	#NULL!	1	1351	1351	1351	1351
134750	12.08.2005	59	0	1	1.37	#NULL!	83	56.5268	2	3	2	1	1	0	0	0	0	0	0	0	1	0	0	0	2	0	3	3	3	0	1	1	2	35	0	0	0	0	0	0	0	0	0	#NULL!	1	2730	2730	2730	2730
1672782	21.07.2006	57	0	1	0.9	170	80	92.4431	0	0	2	1	1	0	0	0	0	0	0	1	1	0	0	1	1	0	3	0	3	0	1	1	#NULL!	#NULL!	0	0	0	0	0	0	0	0	0	#NULL!	0	2387	2387	2387	2387
5138671	29.07.2005	52	0	1	0.66	170	80	134.713	0	0	2	1	2	0	0	0	0	1	1	1	1	1	0	0	1	0	3	3	3	0	1	1	0	55	0	0	0	0	0	0	0	0	0	#NULL!	0	2744	2744	2744	2744
415619	26.10.2006	61	0	1	0.8	170	85	104.454	0	0	2	1	4	0	0	0	0	1	0	0	2	1	0	0	2	0	3	0	3	0	1	0	0	55	0	0	0	0	0	0	0	0	0	#NULL!	1	2290	2290	2290	2290
1578004	03.01.2007	52	0	1	1.05	175	75	78.8337	1	0	2	1	2	0	0	0	0	1	0	0	0	1	0	0	1	0	3	2	3	0	1	1	0	55	0	0	0	0	0	0	0	0	0	#NULL!	0	2221	2221	2221	2221
209316	06.04.2003	73	2	2	0.8	160	70	74.7303	1	0	2	1	3	0	0	0	0	0	0	1	1	0	0	0	1	0	3	3	3	0	1	1	0	50	0	0	0	0	0	0	0	0	0	#NULL!	0	3589	3589	3589	3589
1685302	05.03.2007	52	0	1	0.84	167	84	101.987	0	0	2	1	2.5	0	0	0	0	0	0	0	1	1	0	0	3	2	3	2	3	0	1	1	1	45	0	0	0	0	0	0	0	0	0	#NULL!	1	2160	2160	2160	2160
2691246	31.07.2005	51	0	1	0.89	#NULL!	80	95.7812	0	0	2	1	1.5	0	0	0	0	0	0	0	1	1	0	0	1	0	3	0	3	0	1	1	0	55	0	0	0	0	0	0	0	0	0	#NULL!	0	2742	2742	2742	2742
5450438	04.01.2007	50	0	1	0.9	174	70	94.935	0	0	2	1	1	0	0	0	0	1	0	0	0	1	0	0	1	0	3	3	3	0	1	1	0	55	0	0	0	0	0	0	0	0	0	#NULL!	0	2220	2220	2220	2220
5262187	29.07.2006	52	0	1	1.16	176	80	70.2716	1	0	2	1	1.5	0	0	0	0	1	0	0	1	1	0	0	1	0	3	0	3	0	1	1	0	55	0	0	0	0	0	0	0	0	0	#NULL!	0	2379	2379	2379	2379
31790315	04.10.2007	43	0	1	0.81	180	108	110.542	0	0	2	1	2.5	0	0	0	0	0	0	1	2	1	0	0	1	0	3	3	3	0	1	1	0	55	0	0	0	0	0	0	0	0	0	#NULL!	0	1947	1947	1947	1947
32187196	05.02.2006	70	2	1	1.05	173	74	74.2174	1	0	2	1	4	0	0	0	0	0	0	1	0	1	0	0	2	0	3	0	3	0	1	1	1	45	0	0	0	0	0	0	0	0	0	#NULL!	1	2553	2553	2553	2553
5142162	23.06.2009	55	0	1	0.77	172	70	111.483	0	0	2	1	1	0	0	0	0	1	0	0	1	0	0	0	1	0	3	0	3	0	1	1	1	45	0	0	0	0	0	0	0	0	0	#NULL!	0	1319	1319	1319	1319
4190242	14.04.2009	60	0	1	1.08	178	94	74.1271	1	0	2	1	2	0	0	0	0	0	1	1	1	1	1	1	1	0	3	2	3	0	1	1	0	55	0	0	0	0	0	0	0	0	0	#NULL!	0	1389	1389	1389	1389
6750393	30.01.2007	51	0	1	0.85	176	85	101.001	0	0	2	1	1.5	0	0	0	0	0	0	1	1	0	0	0	1	0	3	0	2	1	0	1	0	55	0	0	0	0	0	0	0	0	0	#NULL!	0	2194	2194	2194	2194
7161601	07.12.2001	64	0	1	1	#NULL!	#NULL!	79.9574	1	0	2	1	0.75	0	0	0	0	0	0	0	1	1	0	0	3	2	3	2	3	0	1	0	1	42	0	0	0	0	0	0	0	0	0	#NULL!	1	4074	4074	4074	4074
5473619	15.04.2008	51	0	1	0.65	182	114	137.649	0	0	2	1	1	1	1	0	0	1	0	0	1	1	0	0	1	0	3	3	3	0	1	1	0	55	0	0	0	0	0	0	0	0	0	#NULL!	0	1753	1753	1753	1753
3064631	27.05.2009	74	2	1	1.1	165	68	69.5491	1	0	2	1	1	0	0	0	0	0	0	1	2	0	0	0	3	2	3	0	3	0	1	1	1	45	0	0	0	0	0	0	0	0	0	#NULL!	1	1346	1346	1346	1346
3506196	12.02.2010	63	0	1	0.8	165	60	103.772	0	0	2	1	1.5	1	1	0	0	0	0	0	1	0	0	0	1	0	3	0	3	0	1	1	2	35	0	0	0	0	0	0	0	0	0	#NULL!	0	1085	1085	1085	1085
2210146	28.12.2007	40	0	1	#NULL!	180	71	#NULL!	#NULL!	#NULL!	2	1	1.5	0	0	0	0	0	0	0	0	0	0	0	1	0	3	0	3	0	1	1	0	55	0	0	0	0	0	0	0	0	0	#NULL!	0	1862	1862	1862	1862
4224337	22.03.2010	66	2	2	0.6	168	76	143.271	0	0	2	1	2	0	0	0	0	0	0	1	0	0	0	0	1	0	3	0	3	0	1	0	1	45	0	0	0	0	0	0	0	0	0	#NULL!	0	1047	1047	1047	1047
515117	22.12.2004	54	0	1	1.01	170	80	81.8182	1	0	2	1	1	0	0	0	0	1	1	0	0	0	1	0	2	0	3	0	3	0	1	0	0	60	0	0	0	0	0	0	0	0	0	#NULL!	1	2963	2963	2963	2963
7367861	10.06.2006	79	2	2	0.72	156	59	83.0495	1	0	2	1	1	0	0	0	0	0	0	1	0	0	0	0	2	0	3	3	3	0	1	1	0	55	0	0	0	0	0	0	0	0	0	#NULL!	1	2428	2428	2428	2428
460955	22.12.2005	62	0	1	1.2	163	70	65.2052	1	0	2	1	10	0	0	0	0	0	0	0	1	0	0	0	3	2	3	3	3	0	1	1	0	55	0	0	0	0	0	0	0	0	0	#NULL!	1	2598	2598	2598	2598
3045282	14.09.2007	63	0	1	1.14	170	78	68.957	1	0	2	1	#NULL!	1	1	0	0	0	1	0	1	1	0	0	1	0	3	0	3	0	1	1	0	55	0	0	0	0	0	0	0	0	0	#NULL!	0	1967	1967	1967	1967
5179694	17.10.2007	53	0	1	1.09	167	72	75.2133	1	0	2	1	4	0	0	0	0	1	0	1	2	1	0	0	1	0	3	0	3	0	1	0	0	55	0	0	0	0	0	0	0	0	0	#NULL!	0	1934	1934	1934	1934
30472963	31.12.2002	87	2	2	1.9	160	70	26.5774	3	3	2	1	3	0	0	0	0	0	0	1	0	1	0	0	1	0	3	2	2	1	0	0	0	45	0	0	0	0	0	0	0	0	0	#NULL!	0	3685	3685	3685	3685
5094519	07.11.2008	56	0	1	1.3	178	120	60.6932	1	0	2	1	12	0	0	0	0	1	1	1	0	1	0	0	3	2	3	0	3	0	1	1	1	45	0	0	0	0	0	0	0	0	0	#NULL!	1	1547	1547	1547	1547
5274563	07.08.2007	52	0	1	0.78	175	82	111.093	0	0	2	1	7	0	0	0	0	1	0	1	1	0	0	0	1	0	3	2	3	0	1	1	0	55	0	0	0	0	0	0	0	0	0	#NULL!	0	2005	2005	2005	2005
30325749	30.03.2006	47	0	1	0.92	180	90	93.7273	0	0	2	1	1	1	1	0	0	1	0	0	1	1	0	0	1	0	3	3	3	0	1	0	0	55	0	0	0	0	0	0	0	0	0	#NULL!	0	2500	2500	1234	1234
5088802	05.08.2006	54	0	1	1.17	184	88	69.0479	1	0	2	1	15	0	0	0	0	0	0	0	0	1	0	0	1	0	3	0	3	0	1	1	0	55	0	0	0	0	0	0	0	0	0	#NULL!	0	2372	2372	2372	2372
1351095	26.04.2003	51	0	1	1.14	168	80	71.9794	1	0	2	1	1	0	0	0	0	0	0	1	0	0	1	0	1	0	3	0	3	0	1	1	1	45	0	0	0	0	0	0	0	0	0	#NULL!	0	3569	3569	3569	3569
5164741	04.08.2003	50	0	1	0.89	178	83	96.167	0	0	2	1	1.5	1	0	0	0	1	0	0	1	0	0	0	3	2	3	0	3	0	1	1	0	45	0	0	0	0	0	0	0	0	0	#NULL!	1	3469	3469	3469	3469
5355915	08.01.2010	54	0	2	0.32	112	41	228.717	0	0	2	1	4	0	0	0	0	1	0	1	1	1	0	0	1	0	3	3	3	0	1	0	1	45	0	0	0	0	0	0	0	0	0	#NULL!	0	1120	1120	1120	1120
2228102	11.08.2003	37	0	1	0.7	180	87	134.873	0	0	2	1	1	0	0	0	0	1	0	0	2	0	0	0	1	0	3	0	3	0	1	1	0	50	0	0	0	0	0	0	0	0	0	#NULL!	0	3462	3462	3462	3462
4769403	11.12.2007	63	0	1	0.89	175	80	91.7594	0	0	2	1	0.5	0	0	0	0	1	0	0	0	1	0	0	3	2	3	3	3	0	1	1	0	55	0	0	0	0	0	0	0	0	0	#NULL!	1	1879	1879	1879	1879
429817	13.07.2003	56	0	1	1.05	170	80	77.6566	1	0	2	1	1.5	1	0	0	0	0	0	0	0	0	0	0	2	0	3	3	3	0	1	1	3	30	0	0	0	0	0	0	0	0	0	#NULL!	1	3491	3491	3491	3491
5558617	05.06.2008	49	0	2	0.82	156	60	79.0712	1	0	2	1	1.5	0	0	0	0	1	0	0	1	1	0	0	1	0	3	0	3	0	1	1	0	55	0	0	0	0	0	0	0	0	0	#NULL!	0	1702	1702	1702	1702
7189444	20.10.2002	63	0	1	0.8	182	88	103.772	0	0	2	1	2	0	0	0	0	0	0	0	1	1	0	0	1	0	3	3	3	0	1	0	0	45	0	0	0	0	0	0	0	0	0	#NULL!	0	3757	3757	3757	3757
4330095	08.08.2005	85	2	2	1.25	160	80	43.2923	2	3	2	1	3	0	0	0	0	0	1	1	0	1	0	0	1	0	3	0	3	0	1	0	0	55	0	0	0	0	0	0	0	0	0	20.08.2009	0	2734	1473	2734	1473
5433197	22.03.2007	51	0	1	1.1	180	110	75.0083	1	0	2	1	1	0	0	0	0	1	0	1	1	1	0	0	2	0	3	0	3	0	1	1	1	35	0	0	0	0	0	0	0	0	0	#NULL!	1	2143	2143	2143	2143
1713810	01.02.2005	48	0	1	0.76	170	75	116.349	0	0	2	1	1	0	0	0	0	0	0	0	1	0	0	0	1	0	3	0	3	0	1	0	0	55	0	0	0	0	0	0	0	0	0	#NULL!	0	2922	2922	2922	2922
750231	08.08.2005	65	0	1	0.94	170	60	85.6056	1	0	2	1	1.5	0	0	0	0	1	0	1	1	1	0	1	1	0	3	2	3	0	1	1	1	45	0	0	0	0	0	0	0	0	0	#NULL!	0	2734	2734	2734	2734
4472636	06.10.2002	57	0	1	0.9	168	95	92.4431	0	0	2	1	2.5	0	0	0	0	0	0	0	1	0	0	0	1	0	3	0	3	0	1	1	1	45	0	0	0	0	0	0	0	0	0	#NULL!	0	3771	3771	3771	3771
5288812	20.01.2005	51	0	2	0.49	156	81	141.512	0	0	2	1	2.5	0	0	0	0	1	0	0	1	0	0	0	1	0	3	3	3	0	1	1	0	50	0	0	0	0	0	0	0	0	0	#NULL!	0	2934	2934	2934	2934
5322913	17.09.2001	52	0	1	1	#NULL!	#NULL!	83.3997	1	0	2	1	1	1	0	0	0	1	0	1	1	1	0	0	1	0	3	1	3	0	1	0	1	45	0	0	0	0	0	0	0	0	0	#NULL!	0	4155	4155	4155	4155
4673991	29.06.2003	75	2	1	1.3	160	54	57.1985	2	3	2	1	5	0	0	0	0	0	0	0	0	0	0	0	1	0	3	0	3	0	1	1	0	45	0	0	0	0	0	0	0	0	0	#NULL!	0	3505	3505	3505	3505
32139641	12.07.2006	70	2	1	1.4	165	66	53.2508	2	3	2	1	#NULL!	0	1	0	0	0	0	1	0	1	0	0	1	0	3	0	3	0	1	1	0	55	0	0	0	0	0	0	0	0	0	#NULL!	0	2396	2396	2396	2396
198364	28.10.2004	80	2	2	0.83	165	80	70.3029	1	0	2	1	1.5	0	0	0	0	1	0	1	0	1	0	1	1	0	3	0	3	0	1	1	0	45	0	0	0	0	0	0	0	0	0	#NULL!	0	3018	3018	3018	3018
867911	18.08.2003	61	0	2	0.6	165	70	108.021	0	0	2	1	1	0	0	0	0	1	0	1	0	0	0	0	1	0	3	0	3	0	1	1	0	45	0	0	0	0	0	0	0	0	0	#NULL!	0	3455	3455	3455	3455
30391851	01.04.2001	54	0	1	#NULL!	#NULL!	#NULL!	#NULL!	#NULL!	#NULL!	2	1	3	0	0	0	0	0	0	0	1	1	0	0	2	0	3	0	3	#NULL!	1	1	#NULL!	#NULL!	0	0	0	0	0	0	0	0	0	#NULL!	1	4324	4324	4324	4324
5780703	02.02.2008	45	0	1	0.69	180	80	131.789	0	0	2	1	1	0	0	0	0	1	0	0	1	0	0	0	1	0	3	0	3	0	1	1	1	45	0	0	0	0	0	0	0	0	0	#NULL!	0	1826	1826	1826	1826
92244	11.06.2006	57	0	1	1.02	186	#NULL!	80.0103	1	0	2	1	4	1	0	0	0	0	0	0	1	1	0	0	1	0	3	3	3	0	1	0	0	55	0	0	0	0	0	0	0	0	0	#NULL!	0	2427	2427	2427	2427
5549523	22.11.2006	48	0	1	1.11	175	84	75.1481	1	0	2	1	0.5	0	0	0	0	0	0	0	1	0	0	0	3	2	3	0	3	0	1	1	0	55	0	0	0	0	0	0	0	0	0	#NULL!	1	2263	2263	2263	2263
1213709	05.05.2007	59	0	1	0.86	175	90	96.7428	0	0	2	1	9	0	0	0	0	0	0	1	1	0	0	0	1	0	3	0	3	0	1	1	1	45	0	0	0	0	0	0	0	0	0	#NULL!	0	2099	2099	2099	2099
170519	19.12.2004	60	0	1	1	178	80	81.0118	1	0	2	1	5	0	0	0	0	0	0	0	0	0	0	0	1	0	3	0	3	0	1	1	2	30	0	0	0	0	0	0	0	0	0	#NULL!	0	2966	2966	2966	2966
30920258	09.12.2003	39	0	1	0.84	170	100	108.121	0	0	2	1	6	0	0	0	0	0	0	0	1	1	0	0	1	0	3	0	3	1	1	1	0	45	0	0	0	0	0	0	0	0	0	#NULL!	0	3342	3342	3342	3342
4178863	10.07.2010	63	0	1	1.27	180	88	60.8776	1	0	2	1	6	0	0	0	0	0	0	0	0	1	0	0	1	0	3	0	3	0	1	0	0	60	0	0	0	0	0	0	0	0	0	#NULL!	0	937	937	937	937
946698	28.09.2009	77	2	1	1.01	170	76	76.1322	1	0	2	1	6	0	0	0	0	0	0	1	0	0	0	0	2	0	3	0	3	0	1	1	2	35	0	0	0	0	0	0	0	0	0	#NULL!	1	1222	1222	1222	1222
31445838	30.06.2004	49	0	1	0.9	173	100	95.3251	0	0	2	1	1	0	0	0	0	0	0	1	1	0	0	0	1	0	3	2	3	0	1	1	0	45	0	0	0	0	0	0	0	0	0	#NULL!	0	3138	3138	3138	3138
31718871	18.02.2008	55	0	1	0.85	168	72	99.4649	0	0	2	1	3	0	0	0	0	0	1	1	0	1	0	0	1	0	3	1	3	0	1	1	0	55	0	0	0	0	0	0	0	0	0	#NULL!	0	1810	1810	1810	1810
5089976	25.07.2007	55	0	1	1.03	167	64	79.6902	1	0	2	1	0.5	0	0	0	0	1	0	0	1	0	0	0	1	0	3	3	3	0	1	1	0	55	0	0	0	0	0	0	0	0	0	#NULL!	0	2018	2018	2018	2018
7007743	10.05.2010	61	0	1	1.08	172	60	73.8788	1	0	2	1	9	0	0	0	0	0	0	1	1	1	0	0	1	0	3	2	3	0	1	1	0	55	0	0	0	0	0	0	0	0	0	#NULL!	0	998	998	998	998
7214954	16.10.2003	53	0	2	0.78	#NULL!	#NULL!	82.113	1	0	2	1	1.5	0	0	0	0	1	1	0	0	0	0	0	1	0	3	3	3	0	1	0	1	45	0	0	0	0	0	0	0	0	0	#NULL!	0	3396	3396	3396	3396
4821583	26.06.2004	58	0	1	0.98	172	73	83.4953	1	0	2	1	1	0	0	0	0	0	0	1	0	0	0	0	1	0	3	0	3	0	1	1	0	55	0	0	0	0	0	0	0	0	0	#NULL!	0	3142	3142	3142	3142
5364651	22.02.2009	53	0	1	0.74	173	100	117.596	0	0	2	1	5	0	0	0	0	0	0	0	0	1	0	0	1	0	3	0	3	0	1	1	0	55	0	0	0	0	0	0	0	0	0	#NULL!	0	1440	1440	1440	1440
292629	10.06.2006	80	2	1	1.55	175	75	46.0832	2	3	2	1	1.5	0	0	0	0	0	0	1	0	0	0	0	1	0	3	0	3	0	1	0	0	55	0	0	0	0	0	0	0	0	0	#NULL!	0	2428	2428	2428	2428
5107762	22.08.2005	52	0	1	0.72	177	80	121.844	0	0	2	1	3	0	0	0	0	1	0	0	1	1	0	0	1	0	3	3	3	0	1	1	1	45	0	0	0	0	0	0	0	0	0	#NULL!	0	2720	2720	2720	2720
5388444	25.12.2004	49	0	2	0.45	160	60	157.398	0	0	2	1	1	0	0	0	0	0	0	0	1	0	0	0	1	0	3	2	3	0	1	1	0	45	0	0	0	0	0	0	0	0	0	#NULL!	0	2960	2960	2960	2960
755628	28.05.2002	70	2	1	0.9	175	80	88.667	1	0	2	1	0.75	1	0	0	0	1	0	1	2	1	0	0	1	0	3	0	3	0	1	1	2	30	0	0	0	0	0	0	0	0	0	#NULL!	0	3902	3902	3902	3902
5403829	09.02.2006	49	0	1	0.94	165	66	90.6596	0	0	2	1	1.5	0	0	0	0	0	0	0	1	1	0	0	1	0	3	3	3	0	1	1	0	55	0	0	0	0	0	0	0	0	0	#NULL!	0	2549	2549	2549	2549
5215085	26.10.2008	55	0	1	0.84	172	81	100.833	0	0	2	1	1	0	0	0	0	0	1	0	1	1	0	0	1	0	3	3	3	0	1	0	0	55	0	0	0	0	0	0	0	0	0	#NULL!	0	1559	1559	1559	1559
881565	17.01.2007	63	0	1	0.95	170	62	85.1047	1	0	2	1	4	0	0	0	0	0	0	1	1	0	0	0	1	0	3	0	3	0	1	1	0	55	0	0	0	0	0	0	0	0	0	#NULL!	0	2207	2207	2207	2207
3057031	10.07.2005	55	0	1	0.97	185	90	85.4053	1	0	2	1	2	0	0	0	0	0	0	0	1	0	0	0	1	0	3	0	3	0	1	1	1	45	0	0	0	0	0	0	0	0	0	#NULL!	0	2763	2763	2763	2763
5093031	21.12.2006	55	0	1	1.44	160	63	54.1339	2	3	2	1	1.5	0	0	0	0	1	0	0	0	1	0	0	1	0	3	0	3	0	1	1	1	45	0	0	0	0	0	0	0	0	0	#NULL!	0	2234	2234	2234	2234
2771975	24.09.2009	39	0	1	0.93	174	113	96.1385	0	0	2	1	2.5	0	0	0	0	1	0	1	1	0	0	0	1	0	3	2	3	0	1	1	0	55	0	0	0	0	0	0	0	0	0	#NULL!	0	1226	1226	1226	1226
4255856	03.11.2005	57	0	1	1.23	177	88	64.4644	1	0	2	1	2	0	0	0	0	0	0	0	1	0	0	0	1	0	3	3	3	0	1	1	1	45	0	0	0	0	0	0	0	0	0	#NULL!	0	2647	2647	2647	2647
719609	25.10.2007	74	2	1	0.88	179	80	89.9758	0	0	2	1	4	0	0	0	0	1	0	1	0	0	0	0	2	0	3	1	3	0	1	1	1	45	0	0	0	0	0	0	0	0	0	#NULL!	1	1926	1926	1926	1926
5361958	05.07.2006	50	0	1	0.9	168	120	94.935	0	0	2	1	2.5	0	0	0	0	0	0	0	2	0	0	0	1	0	3	3	3	0	1	1	2	35	0	0	0	0	0	0	0	0	0	#NULL!	0	2403	2403	2403	2403
373739	05.08.2003	71	2	1	1	178	76	78.2902	1	0	2	1	2.5	0	0	0	0	0	0	0	0	0	0	0	1	0	3	3	3	0	1	1	0	55	0	0	0	0	0	0	0	0	0	#NULL!	0	3468	3468	3468	3468
31020073	26.12.2005	64	0	2	0.77	160	63	80.2143	1	0	2	1	1	1	1	0	0	1	0	1	0	1	0	0	2	0	3	2	3	0	1	1	0	55	0	0	0	0	0	0	0	0	0	#NULL!	1	2594	2594	2594	2594
6940503	19.01.2008	73	2	1	1.02	184	100	76.0911	1	0	2	1	1.5	0	0	0	0	0	0	1	0	0	0	0	1	0	3	0	3	0	1	1	0	55	0	0	0	0	0	0	0	0	0	#NULL!	0	1840	1840	1840	1840
5455526	02.01.2006	49	0	1	0.86	175	77	100.46	0	0	2	1	3	0	0	0	0	1	0	0	1	1	0	0	2	0	3	3	3	0	1	0	2	35	0	0	0	0	0	0	0	0	0	#NULL!	1	2587	2587	2587	2587
1724082	27.01.2007	58	0	2	0.61	160	80	107.071	0	0	2	1	1.5	0	0	0	0	0	0	1	1	1	0	0	1	0	3	0	3	0	1	1	0	55	0	0	0	0	0	0	0	0	0	#NULL!	0	2197	2197	2197	2197
1157670	18.10.2006	51	0	1	2.34	172	100	31.3907	2	3	2	1	7.5	0	0	0	0	0	0	1	1	0	0	0	1	0	3	0	3	0	1	0	0	55	0	0	0	0	0	0	0	0	0	#NULL!	0	2298	2298	2298	2298
5118608	19.08.2008	55	0	1	0.78	155	60	109.835	0	0	2	1	0.5	0	0	0	0	1	0	0	1	0	0	0	1	0	3	0	3	0	1	1	0	55	0	0	0	0	0	0	0	0	0	#NULL!	0	1627	1627	1627	1627
5071585	02.04.2003	51	0	1	0.9	170	80	94.5541	0	0	2	1	1	0	0	0	0	1	0	0	1	0	0	0	1	0	3	3	3	0	1	1	1	45	0	0	0	0	0	0	0	0	0	#NULL!	0	3593	3593	3593	3593
953802	08.01.2005	72	2	2	1.05	158	62	54.7553	2	3	2	1	#NULL!	0	0	0	0	0	0	1	0	0	1	0	2	0	3	3	3	0	1	0	1	45	0	0	0	0	0	0	0	0	0	#NULL!	1	2946	2946	2946	2946
5284184	01.08.2003	48	0	1	1.1	#NULL!	#NULL!	75.9371	1	0	2	1	4	0	0	0	0	0	0	0	0	1	0	0	1	0	3	2	3	0	1	1	0	45	0	0	0	0	0	0	0	0	0	#NULL!	0	3472	3472	3472	3472
5290360	27.10.2004	50	0	2	0.53	170	92	129.781	0	0	2	1	1	1	1	0	0	1	1	0	2	1	0	0	1	0	3	3	3	0	1	1	2	30	0	0	0	0	0	0	0	0	0	#NULL!	0	3019	3019	3019	3019
31173590	15.10.2005	65	0	1	0.73	164	54	114.609	0	0	2	1	#NULL!	0	0	0	0	0	0	0	2	0	0	0	1	0	3	3	3	0	1	1	1	45	0	0	0	0	0	0	0	0	0	#NULL!	0	2666	2666	2666	2666
5968470	08.02.2010	44	0	1	1	175	105	86.2764	1	0	2	1	1.5	0	0	0	0	1	0	1	1	0	0	0	1	0	3	0	3	0	1	1	1	45	0	0	0	0	0	0	0	0	0	#NULL!	0	1089	1089	1089	1089
7002093	14.03.2007	68	2	1	0.9	171	86	89.1903	1	0	2	1	3	0	0	0	0	0	1	1	1	1	0	0	1	0	3	0	3	0	1	1	0	60	0	0	0	0	0	0	0	0	0	#NULL!	0	2151	2151	2151	2151
5388013	31.01.2007	50	0	1	0.96	176	78	88.1213	1	0	2	1	2.5	0	0	0	0	1	0	1	1	1	0	0	1	0	3	0	3	0	1	1	0	55	0	0	0	0	0	0	0	0	0	#NULL!	0	2193	2193	2193	2193
5953225	30.09.2004	38	0	1	0.8	172	100	114.988	0	0	2	1	1	0	0	0	0	1	0	0	1	1	0	0	1	0	3	0	3	0	1	1	2	30	0	0	0	0	0	0	0	0	0	#NULL!	0	3046	3046	3046	3046
2299100	07.01.2010	42	0	1	0.8	174	94	112.675	0	0	2	1	3.5	0	0	0	0	0	0	1	2	1	0	0	1	0	3	0	3	0	1	0	0	55	0	0	0	0	0	0	0	0	0	#NULL!	0	1121	1121	1121	1121
1434974	12.08.2004	53	0	1	0.78	170	83	110.664	0	0	2	1	2.5	0	0	0	0	1	1	0	0	1	0	0	3	2	3	0	3	0	1	1	1	45	0	0	0	0	0	0	0	0	0	#NULL!	1	3095	3095	3095	3095
32200082	17.02.2007	57	0	1	1.8	170	70	41.5419	2	3	2	1	3	0	1	0	0	0	0	0	0	1	0	1	1	0	3	0	3	0	1	1	0	55	0	0	0	0	0	0	0	0	0	#NULL!	0	2176	2176	2176	2176
5226103	05.05.2006	53	0	1	1.18	154	78	68.633	1	0	2	1	1	0	0	0	0	0	0	0	1	0	0	0	1	0	3	0	3	0	1	1	0	55	0	0	0	0	0	0	0	0	0	#NULL!	0	2464	2464	2464	2464
5769305	11.09.2004	42	0	1	1	170	70	87.095	1	0	2	1	1.5	0	0	0	0	1	0	0	1	0	0	0	1	0	3	2	3	0	1	1	0	55	0	0	0	0	0	0	0	0	0	#NULL!	0	3065	3065	1902	1902
30382186	23.09.2009	61	0	1	1.39	178	93	55.2143	2	3	2	1	3	0	0	0	0	1	0	0	1	0	0	0	1	0	3	0	3	0	1	1	1	45	0	0	0	0	0	0	0	0	0	#NULL!	0	1227	1227	1227	1227
30907735	07.08.2005	70	2	1	1.9	165	95	37.4349	2	3	2	1	7	1	1	0	0	0	1	1	0	1	0	0	3	2	3	0	3	0	1	1	1	45	0	0	0	0	0	0	0	0	0	#NULL!	1	2735	2735	2735	2735
3055198	03.08.2004	54	0	1	0.9	182	64	93.4633	0	0	2	1	6	0	0	0	0	0	0	0	2	0	0	0	3	2	3	0	3	1	1	1	0	45	0	0	0	0	0	0	0	0	0	#NULL!	1	3104	3104	3104	3104
376178	20.09.2002	56	0	1	0.8	184	120	106.283	0	0	2	1	5	0	0	0	0	0	0	0	0	1	0	0	1	0	3	0	3	0	1	1	0	45	0	0	0	0	0	0	0	0	0	#NULL!	0	3787	3787	3787	3787
5046250	25.07.2005	54	0	1	0.86	181	72	98.4976	0	0	2	1	2.5	0	0	0	0	0	0	0	1	0	0	0	1	0	3	0	2	0	0	1	0	55	0	0	0	0	0	0	0	0	0	#NULL!	0	2748	2748	2748	2748
5842419	27.12.2002	39	0	1	0.9	180	100	99.8461	0	0	2	1	2	0	0	0	0	1	0	0	1	1	0	0	1	0	3	3	3	0	1	0	2	30	0	0	0	0	0	0	0	0	0	#NULL!	0	3689	3689	3689	3689
720473	10.05.2009	70	2	2	0.61	160	60	103.06	0	0	2	1	8	0	0	0	0	0	0	1	0	1	0	0	1	0	3	2	3	0	1	0	0	55	0	0	0	0	0	0	0	0	0	#NULL!	0	1363	1363	1363	1363
1052795	03.09.2008	83	2	2	0.89	160	61	64.6398	1	0	2	1	1	0	0	0	0	0	0	0	0	0	0	0	1	0	3	0	3	0	1	0	0	55	0	0	0	0	0	0	0	0	0	#NULL!	0	1612	1612	1612	1612
6884782	10.11.2006	58	0	1	1.01	178	74	80.6399	1	0	2	1	0.66	0	0	0	0	0	0	0	1	1	0	0	1	0	3	3	3	0	1	1	0	55	0	0	0	0	0	0	0	0	0	#NULL!	0	2275	2275	2275	2275
5953085	20.02.2008	42	0	1	0.87	171	67	102.279	0	0	2	1	3	0	0	0	0	1	0	0	1	1	1	0	1	0	3	0	3	0	1	1	1	45	0	0	0	0	0	0	0	0	0	#NULL!	0	1808	1808	1808	1808
3540234	30.11.2006	61	0	1	0.73	180	86	116.096	0	0	2	1	1	1	1	0	0	1	1	0	1	1	0	0	1	0	3	0	3	0	1	1	1	45	0	0	0	0	0	0	0	0	0	#NULL!	0	2255	2255	2255	2255
1433149	11.10.2007	43	0	1	1.03	170	85	83.7731	1	0	2	1	4	0	0	0	0	0	0	0	1	1	0	0	1	0	3	2	3	0	1	1	0	55	0	0	0	0	0	0	0	0	0	#NULL!	0	1940	1940	1940	1940
7299298	10.04.2005	58	0	1	0.78	168	78	108.658	0	0	2	1	2	0	0	0	0	1	1	0	1	1	0	0	1	0	3	0	3	0	1	1	0	55	0	0	0	0	0	0	0	0	0	#NULL!	0	2854	2854	2854	2854
5887143	25.10.2002	47	0	1	0.8	170	75	110.131	0	0	2	1	2	0	0	0	0	1	0	0	1	0	0	0	1	0	3	0	3	0	1	1	1	45	0	0	0	0	0	0	0	0	0	#NULL!	0	3752	3752	3752	3752
815122	25.04.2003	78	2	2	0.7	#NULL!	55	86.0159	1	0	2	1	7	0	0	0	0	0	0	0	0	0	0	0	1	0	3	0	3	0	1	1	1	45	0	0	0	0	0	0	0	0	0	#NULL!	0	3570	3570	3570	3570
5288483	27.04.2008	53	0	2	0.53	160	67	128.774	0	0	2	1	2	0	0	0	0	0	0	0	1	1	0	0	2	0	3	3	3	0	1	0	0	55	0	0	0	0	0	0	0	0	0	#NULL!	1	1741	1741	1741	1741
1036726	30.06.2009	64	0	1	0.69	160	85	122.695	0	0	2	1	12	1	0	0	0	0	1	1	1	1	0	0	3	2	3	3	3	0	1	1	1	45	0	0	0	0	0	0	0	0	0	#NULL!	1	1312	1312	1312	1312
4673736	09.06.2009	65	0	1	0.73	174	64	114.609	0	0	1	1	1	0	0	0	0	1	0	0	0	1	0	0	1	0	3	3	3	0	1	0	0	55	0	0	0	0	0	0	0	0	0	#NULL!	0	1333	1333	1333	1333
6826515	17.03.2003	71	2	1	1.2	160	55	63.4355	1	0	2	1	#NULL!	0	0	0	0	0	0	0	1	0	0	0	1	0	3	3	3	0	1	0	0	45	0	0	0	0	0	0	0	0	0	#NULL!	0	3609	3609	3609	3609
32210770	03.01.2007	46	0	1	1.19	176	105	69.9507	1	0	2	1	5	0	0	0	0	1	0	1	0	1	0	0	2	0	3	2	3	0	1	0	0	55	0	0	0	0	0	0	0	0	0	#NULL!	1	2221	2221	2221	2221
365186	22.02.2005	68	2	1	0.99	178	95	79.9007	1	0	2	1	4	0	0	0	0	1	0	0	1	1	0	0	3	2	3	2	3	0	1	1	1	45	0	0	0	0	0	0	0	0	0	#NULL!	1	2901	2901	2901	2901
30383795	05.09.2009	60	0	1	0.79	180	115	106.338	0	0	2	1	1	1	1	0	0	0	1	1	0	1	0	0	2	0	3	2	3	0	1	1	1	45	0	0	0	0	0	0	0	0	0	#NULL!	1	1245	1245	1245	1245
2611331	02.03.2008	71	2	1	0.99	185	87	79.2035	1	0	2	1	1	0	0	0	0	0	0	1	0	0	0	0	2	0	3	2	3	1	1	1	0	55	0	0	0	0	0	0	0	0	0	#NULL!	1	1797	1797	1797	1797
30429355	05.05.2005	48	0	1	1.12	#NULL!	95	74.3744	0	0	2	1	2	0	0	0	0	0	0	0	2	1	0	0	1	0	3	3	3	0	1	1	0	55	0	0	0	0	0	0	0	0	0	#NULL!	0	2829	2829	2829	2829
31425158	17.01.2007	58	0	1	0.87	167	65	95.7926	0	0	2	1	5	0	0	0	0	1	0	1	1	1	0	0	1	0	3	0	3	1	1	1	1	45	0	0	0	0	0	0	0	0	0	#NULL!	0	2207	2207	2207	2207
5903229	09.01.2007	42	0	1	0.64	190	105	145.768	0	0	2	1	4.5	0	0	0	0	0	0	0	0	1	0	0	1	0	3	0	0	0	0	1	2	35	0	0	0	0	0	0	0	0	0	#NULL!	0	2215	2215	2215	2215
5288762	28.01.2004	49	0	2	1	160	45	62.6336	1	0	2	1	1	0	0	0	0	1	0	1	0	0	0	0	1	0	3	1	3	0	1	1	1	40	0	0	0	0	0	0	0	0	0	#NULL!	0	3292	3292	3292	1436
5347000	02.01.2005	49	0	1	1.02	180	100	82.5047	1	0	2	1	4	0	0	0	0	0	0	0	2	0	0	0	1	0	3	3	3	0	1	1	0	45	0	0	0	0	0	0	0	0	0	#NULL!	0	2952	2952	2952	2952
5100123	16.10.2005	53	0	1	0.8	170	70	107.478	0	0	2	1	1.5	0	0	0	0	0	0	0	1	0	0	0	1	0	3	0	3	0	1	1	0	55	0	0	0	0	0	0	0	0	0	#NULL!	0	2665	2665	2665	2665
7337718	26.11.2007	57	0	1	0.85	174	90	98.7463	0	0	2	1	1.5	1	0	0	0	0	1	1	0	0	0	0	2	0	3	0	3	0	1	1	0	55	0	0	0	0	0	0	0	0	0	#NULL!	1	1894	1894	1894	1894
30687154	20.08.2007	56	0	1	0.77	170	102	111.076	0	0	2	1	13	0	0	0	0	0	1	1	1	0	0	0	1	0	3	0	3	0	1	1	0	55	0	0	0	0	0	0	0	0	0	#NULL!	0	1992	1992	1992	1992
4399673	15.02.2005	62	0	1	0.8	162	66	104.11	0	0	2	1	6	0	0	0	0	1	0	0	1	0	0	0	1	0	3	0	3	0	1	1	1	45	0	0	0	0	0	0	0	0	0	#NULL!	0	2908	2908	2908	2908
5293391	12.01.2006	51	0	1	0.94	168	62	89.9263	0	0	2	1	6	0	0	0	0	1	0	0	1	0	0	0	1	0	3	0	3	0	1	1	2	35	0	0	0	0	0	0	0	0	0	#NULL!	0	2577	2577	2577	2577
3526546	20.01.2008	65	0	1	0.61	185	80	141.001	0	0	2	1	#NULL!	0	0	0	0	1	1	0	1	0	0	0	3	2	3	2	3	0	1	0	0	55	0	0	0	0	0	0	0	0	0	#NULL!	1	1839	1839	1839	1839
1304113	30.06.2002	69	2	2	1.3	#NULL!	79	43.1658	2	3	2	1	2	1	0	0	0	0	1	1	0	0	0	0	1	0	3	0	3	0	1	1	0	50	0	0	0	0	0	0	0	0	0	#NULL!	0	3869	3869	3869	3869
4373894	06.04.2005	67	2	1	0.59	176	80	145.632	0	0	2	1	#NULL!	0	0	0	0	0	0	0	1	0	0	0	1	0	3	0	3	0	1	1	0	55	0	0	0	0	0	0	0	0	0	#NULL!	0	2858	2858	2858	2858
4300239	14.03.2007	82	2	2	0.91	150	55	63.1584	1	0	2	1	4	0	0	0	0	0	0	1	0	1	0	0	1	0	3	1	3	0	1	0	1	45	0	0	0	0	0	0	0	0	0	18.06.2010	0	2151	1192	2151	1192
5357352	11.03.2007	52	0	1	0.6	175	98	150.376	0	0	2	1	1	0	0	0	0	1	0	1	1	1	0	0	1	0	3	2	3	0	1	1	0	55	0	0	0	0	0	0	0	0	0	#NULL!	0	2154	2154	2129	2129
6420917	12.11.2002	61	0	1	0.87	175	95	94.8169	0	0	2	1	3	0	0	0	0	0	0	0	0	0	0	0	1	0	3	0	0	0	0	1	0	50	0	0	0	0	0	0	0	0	0	#NULL!	0	3734	3734	3734	3734
1047459	21.11.2003	64	0	1	0.9	178	78	90.2948	0	0	2	1	1	0	0	0	0	0	0	0	0	0	0	0	1	0	3	0	3	0	1	1	0	45	0	0	0	0	0	0	0	0	0	#NULL!	0	3360	3360	3360	3360
30242839	30.12.2005	46	0	1	1.13	180	90	74.2541	1	0	2	1	0.5	0	0	0	0	1	0	0	1	0	0	0	1	0	3	2	3	0	1	1	0	55	0	0	0	0	0	0	0	0	0	#NULL!	0	2590	2590	2590	2590
136497	25.01.2004	60	0	1	1.8	#NULL!	60	41.1115	2	3	2	1	10	0	0	0	0	0	0	0	1	0	0	0	2	0	3	0	3	0	1	1	1	45	0	0	0	0	0	0	0	0	0	#NULL!	1	3295	3295	3295	1814
5442696	19.04.2009	53	0	1	1.36	175	130	58.2614	2	3	2	1	2	0	0	0	0	0	1	1	2	1	1	0	2	0	3	0	3	#NULL!	1	0	0	55	0	0	0	0	0	0	0	0	0	#NULL!	1	1384	1384	1384	1384
6775244	28.10.2006	48	0	1	0.76	180	115	116.349	0	0	2	1	1	0	0	0	0	1	0	0	1	0	0	0	1	0	3	3	3	0	1	1	0	55	0	0	0	0	0	0	0	0	0	#NULL!	0	2288	2288	2288	2288
5397510	30.03.2003	47	0	1	0.98	#NULL!	85	87.1369	1	0	2	1	2	1	0	0	0	0	0	0	1	1	0	0	1	0	3	0	3	0	1	1	1	35	0	0	0	0	0	0	0	0	0	#NULL!	0	3596	3596	3596	3596
5727328	09.10.2008	47	0	1	1.07	170	88	78.7351	1	0	2	1	2	0	0	0	0	0	0	1	1	1	0	0	1	0	3	0	3	0	1	1	0	55	0	0	0	0	0	0	0	0	0	#NULL!	0	1576	1576	1576	1576
5200873	13.08.2010	57	0	1	0.83	180	112	101.497	0	0	2	1	2	0	0	0	0	1	1	1	0	1	0	0	1	0	3	0	3	0	1	1	0	55	0	0	0	0	0	0	0	0	0	#NULL!	0	903	903	903	903
4633301	07.05.2005	75	2	2	2.18	164	64	23.3723	3	3	2	1	4	0	0	0	0	0	1	1	0	0	0	0	1	0	3	0	3	0	1	0	0	55	0	0	0	0	0	0	0	0	0	01.06.2009	0	2827	1486	2827	1486
2606914	22.01.2004	72	2	1	0.96	#NULL!	90	81.8339	1	0	2	1	16	0	0	0	0	0	0	0	2	0	0	0	1	0	3	0	3	0	1	1	0	55	0	0	0	0	0	0	0	0	0	10.08.2009	0	3298	2027	3298	2027
31162146	28.02.2005	67	2	2	1.21	160	80	47.1725	2	3	2	1	0.75	0	0	0	0	0	0	1	0	1	0	0	1	0	3	1	3	0	1	0	0	50	0	0	0	0	0	0	0	0	0	#NULL!	0	2895	2895	2895	2895
5355003	26.08.2010	54	0	1	1.33	172	80	59.5542	2	3	2	1	7	1	1	0	0	0	0	0	0	1	0	0	1	0	3	0	3	0	1	1	2	35	0	0	0	0	0	0	0	0	0	#NULL!	0	890	890	890	890
6557537	29.09.2003	59	0	1	0.9	178	73	91.7982	0	0	2	1	11	0	0	0	0	0	0	1	1	0	0	0	1	0	3	2	3	0	1	1	0	45	0	0	0	0	0	0	0	0	0	#NULL!	0	3413	3413	3413	3413
5968255	20.01.2007	42	0	1	0.77	190	104	117.756	0	0	2	1	1	0	0	0	0	0	0	0	1	1	0	0	3	2	3	0	3	0	1	1	1	45	0	0	0	0	0	0	0	0	0	#NULL!	1	2204	2204	2204	2204
31033273	16.11.2000	73	2	1	#NULL!	#NULL!	#NULL!	#NULL!	#NULL!	#NULL!	3	1	0	0	0	0	0	0	1	0	0	0	0	0	1	0	2	0	3	#NULL!	1	1	1	45	0	0	0	0	0	0	0	0	1	#NULL!	0	4460	4460	4460	1058
5467369	02.05.2007	50	0	1	0.83	172	65	104.233	0	0	2	1	3	0	0	0	0	0	0	0	1	0	0	0	1	0	2	3	3	0	1	1	0	55	0	0	1	0	0	1	0	0	1	#NULL!	0	2102	2102	2102	335
4481015	11.08.2005	58	0	2	0.94	158	50	65.0057	1	0	2	1	3	1	0	0	0	0	0	0	0	1	0	0	1	0	2	0	3	0	1	0	0	55	0	0	1	0	0	1	0	0	1	#NULL!	0	2731	2731	2731	304
568029	28.10.2009	70	2	1	1.4	159	75	53.2508	2	3	3	1	3	1	0	0	0	0	1	1	0	1	0	0	2	0	2	0	3	0	1	1	1	45	0	0	0	0	0	0	0	0	1	#NULL!	1	1192	1192	1192	938
5548934	25.01.2010	51	0	2	0.64	172	73	103.98	0	0	2	1	4.5	0	0	0	0	1	0	0	1	0	0	0	1	0	2	2	3	0	1	1	0	55	0	0	1	0	0	1	0	0	1	#NULL!	0	1103	1103	1103	237
2326957	13.09.2009	40	0	1	0.83	190	120	109.063	0	0	2	1	3	1	0	0	0	1	0	1	1	1	0	0	1	0	2	0	3	0	1	1	1	45	0	0	1	0	0	1	0	0	1	#NULL!	0	1237	1237	1237	290
53288	14.01.2005	71	2	2	1.6	160	80	33.772	2	3	2	1	0.75	0	0	0	0	1	0	0	0	1	0	0	1	0	2	0	3	0	1	1	0	45	0	1	1	0	1	1	0	1	1	21.11.2008	0	2940	1407	1407	1407
6998469	11.06.2008	53	0	1	1.02	158	65	81.2008	1	0	2	1	10	0	0	0	0	1	1	1	1	1	1	0	2	0	2	0	3	0	1	1	2	35	0	0	1	0	0	1	0	0	1	#NULL!	1	1696	1696	1696	254
4860634	07.02.2002	62	0	1	1.1	180	110	72.0925	1	0	2	1	1.5	0	0	0	0	0	0	0	1	1	0	0	1	0	2	0	3	0	1	1	0	50	0	0	0	0	0	0	0	0	0	#NULL!	0	4012	4012	4012	4012
5086378	20.10.2004	53	0	2	0.6	165	69	111.148	0	0	2	1	3	0	0	0	0	0	0	1	1	0	0	0	1	0	2	0	3	0	1	1	1	45	0	0	0	0	0	0	0	0	0	#NULL!	0	3026	3026	3026	3026
2218526	03.08.2002	37	0	1	0.9	176	85	100.919	0	0	2	1	28	0	0	0	0	0	0	0	1	1	0	0	1	0	2	0	3	0	1	1	2	45	0	0	0	0	0	0	0	0	0	#NULL!	0	3835	3835	3835	3835
5643469	22.04.2009	49	0	1	0.93	186	104	91.7854	0	0	2	1	2	0	0	0	0	0	0	0	1	0	0	0	1	0	2	3	3	0	1	1	0	55	0	0	0	0	0	0	0	0	0	#NULL!	0	1381	1381	1381	1381
4633633	18.10.2006	70	2	1	0.91	178	78	87.5436	1	0	2	1	1	0	0	0	0	1	0	0	0	1	0	0	1	0	2	1	3	0	1	1	0	55	0	0	0	0	0	0	0	0	0	#NULL!	0	2298	2298	2298	2298
4328827	02.09.2005	57	0	1	0.88	178	110	94.8718	0	0	3	1	2	0	0	0	0	1	0	0	0	0	0	1	2	0	2	0	3	0	1	1	0	55	0	0	0	0	0	0	0	0	0	#NULL!	1	2709	2709	2709	2709
6820113	15.02.2006	42	0	1	0.85	167	73	105.062	0	0	2	1	4.5	0	0	0	0	0	1	0	1	1	0	0	1	0	2	1	3	0	1	0	0	55	0	0	0	0	0	0	0	0	0	#NULL!	0	2543	2543	2543	2543
6775192	09.12.2007	64	0	1	1.13	175	75	69.4394	1	0	2	1	1	0	0	0	0	1	0	0	1	1	0	0	1	0	2	1	3	0	1	1	0	55	0	0	0	0	0	0	0	0	0	#NULL!	0	1881	1881	1881	1881
7083646	21.09.2003	56	0	1	1	#NULL!	74	82.1544	1	0	2	1	2	0	0	0	0	0	0	0	1	0	0	0	1	0	2	2	3	0	1	1	0	45	0	0	0	0	0	0	0	0	0	#NULL!	0	3421	3421	3421	3421
1631736	10.01.2008	58	0	2	0.58	150	78	113.946	0	0	2	1	10	0	0	0	0	0	0	0	0	1	0	0	1	0	2	3	3	0	1	0	1	45	0	0	0	0	0	0	0	0	0	#NULL!	0	1849	1849	1849	1849
31079916	06.05.2005	41	0	1	0.88	170	100	101.434	0	0	2	1	3	0	0	0	0	0	0	0	1	0	0	0	1	0	2	0	3	0	1	1	0	55	0	0	0	0	0	0	0	0	0	#NULL!	0	2828	2828	2828	2828
457530	25.02.2006	60	0	1	0.67	178	118	128.605	0	0	2	1	2	0	0	0	0	0	1	0	1	1	0	0	1	0	2	0	2	1	0	1	0	55	0	0	0	0	0	0	0	0	0	#NULL!	0	2533	2533	2533	2533
6481447	28.04.2006	54	0	1	0.79	172	80	108.636	0	0	2	1	#NULL!	0	0	0	0	0	0	0	1	1	0	1	1	0	2	0	3	0	1	1	1	45	0	0	0	0	0	0	0	0	0	#NULL!	0	2471	2471	2471	2471
1350316	27.02.2004	55	0	1	0.7	182	92	124.445	0	0	2	1	1.25	0	0	0	0	1	0	1	0	0	0	0	1	0	2	3	3	0	1	1	0	55	0	0	0	0	0	0	0	0	0	13.11.2008	0	3262	1721	3262	1721
5352847	27.03.2005	50	0	2	0.55	165	58	124.35	0	0	3	1	2	0	0	0	0	0	0	1	1	1	0	0	1	0	2	3	3	0	1	1	1	45	0	0	0	0	0	0	0	0	0	#NULL!	0	2868	2868	2868	2868
31920668	04.11.2006	43	0	1	1.04	175	64	82.8443	1	0	2	1	2	0	0	0	0	0	0	1	1	0	0	0	1	0	2	0	3	0	1	1	2	35	0	0	0	0	0	0	0	0	0	#NULL!	0	2281	2281	2281	2281
32478923	27.06.2009	55	0	1	1.4	178	93	55.9226	2	3	3	1	11.5	0	0	0	0	0	0	1	1	0	0	0	3	2	2	0	3	0	1	1	2	35	0	0	0	0	0	0	0	0	0	#NULL!	1	1315	1315	1315	1315
5096966	17.03.2009	56	0	1	0.84	177	78	100.464	0	0	2	1	7.5	0	0	0	0	1	1	1	0	1	0	0	1	0	2	0	3	0	1	0	1	45	0	0	0	0	0	0	0	0	0	#NULL!	0	1417	1417	1417	1417
7157733	21.02.2009	64	0	1	0.97	177	90	82.8178	1	0	2	1	2	0	0	0	0	0	1	1	2	0	0	0	1	0	2	3	3	0	1	0	1	45	0	0	0	0	0	0	0	0	0	#NULL!	0	1441	1441	1441	1441
30402454	19.01.2006	65	0	1	0.91	162	65	88.8705	1	0	2	1	4	0	0	0	0	0	0	0	1	1	0	0	1	0	2	2	3	0	1	1	0	55	0	0	0	0	0	0	0	0	0	#NULL!	0	2570	2570	2570	2570
5964222	17.03.2004	78	2	1	0.8	170	85	99.3692	0	0	2	1	12	0	0	0	0	0	0	0	2	0	0	0	1	0	2	0	3	0	1	0	1	45	0	0	0	0	0	0	0	0	0	#NULL!	0	3243	3243	3243	3243
5046410	21.03.2005	54	0	1	0.91	180	85	92.2791	0	0	2	1	1	0	0	0	0	0	0	1	0	0	0	0	1	0	2	2	3	0	1	0	0	50	0	0	0	0	0	0	0	0	0	#NULL!	0	2874	2874	2874	2874
5826684	21.02.2007	44	0	1	0.93	173	89	93.8129	0	0	3	1	2	0	0	0	0	1	0	0	2	0	0	0	1	0	2	0	3	0	1	1	0	55	0	0	0	0	0	0	0	0	0	#NULL!	0	2172	2172	2172	2172
7960461	25.12.2004	66	2	1	1.04	170	100	75.9432	1	0	2	1	6	0	0	0	0	0	1	1	1	0	0	0	1	0	2	1	3	0	1	1	0	45	0	0	0	0	0	0	0	0	0	#NULL!	0	2960	2960	2960	2960
4637411	29.06.2009	79	2	1	1.32	173	93	55.6099	2	3	2	1	7	0	0	0	0	0	0	1	2	0	1	0	2	0	2	0	3	0	1	1	0	55	0	0	0	0	0	0	0	0	0	#NULL!	1	1313	1313	1313	1313
1221751	21.07.2002	63	0	1	1	165	70	80.2134	1	0	3	1	6	0	0	0	0	1	0	1	0	0	0	0	1	0	2	0	3	0	1	1	0	45	0	0	0	0	0	0	0	0	0	#NULL!	0	3848	3848	3848	3848
5825136	08.10.2003	40	0	1	0.9	164	78	99.3342	0	0	3	1	4	0	0	0	0	0	0	0	0	1	0	0	1	0	2	0	3	0	1	1	0	45	0	0	0	0	0	0	0	0	0	#NULL!	0	3404	3404	3404	3404
4687053	04.07.2003	67	2	1	1	190	90	79.2172	1	0	2	1	8	1	0	0	0	0	0	1	0	0	1	0	3	2	2	0	3	0	1	1	0	45	0	0	0	0	0	0	0	0	0	#NULL!	1	3500	3500	3500	3500
31041710	07.07.2008	59	0	1	0.89	176	76	92.9895	0	0	3	1	0.33	0	0	0	0	1	1	1	0	0	0	0	2	0	2	0	3	0	1	1	0	55	0	0	0	0	0	0	0	0	0	#NULL!	1	1670	1670	1670	1670
2389753	26.01.2010	41	0	1	0.69	187	120	134.303	0	0	2	1	0.5	0	0	0	0	0	0	1	0	0	0	0	1	0	2	1	3	0	1	0	0	55	0	0	0	0	0	0	0	0	0	#NULL!	0	1102	1102	1102	1102
621494	01.05.2006	61	0	1	0.93	176	94	87.7934	1	0	3	1	0.75	0	0	0	0	1	0	0	0	0	0	0	1	0	2	0	3	0	1	1	0	55	0	0	0	0	0	0	0	0	0	#NULL!	0	2468	2468	2468	2468
5660533	09.04.2006	45	0	1	0.89	180	80	98.246	0	0	2	1	1	0	0	0	0	0	0	0	1	0	0	0	1	0	2	3	3	0	1	1	1	45	0	0	0	0	0	0	0	0	0	#NULL!	0	2490	2490	2490	2490
5769977	18.02.2005	43	0	1	0.87	#NULL!	#NULL!	101.792	0	0	2	1	2	0	0	0	0	0	0	0	1	0	0	0	1	0	2	0	3	0	1	1	1	40	0	0	0	0	0	0	0	0	0	#NULL!	0	2905	2905	2905	2905
31702791	05.01.2007	39	0	1	1.17	180	93	73.7633	1	0	2	1	0.5	0	0	0	0	0	0	0	0	0	0	0	1	0	2	0	3	0	1	1	0	55	0	0	0	0	0	0	0	0	0	#NULL!	0	2219	2219	2219	2219
375696	08.08.2000	65	0	1	#NULL!	#NULL!	#NULL!	#NULL!	#NULL!	#NULL!	2	1	4	0	0	0	0	0	0	1	1	0	0	0	2	0	2	0	3	#NULL!	1	1	3	20	0	0	0	0	0	0	0	0	0	#NULL!	1	4560	4560	4560	4560
5599467	07.04.2010	50	0	1	0.63	173	68	143.279	0	0	3	1	4	0	0	0	0	1	0	0	1	0	0	0	1	0	2	2	3	0	1	1	1	45	0	0	0	0	0	0	0	0	0	#NULL!	0	1031	1031	1031	1031
5478455	05.11.2002	45	0	1	1.3	165	60	63.4483	1	0	2	1	16	0	0	0	0	0	0	0	1	0	0	0	1	0	2	0	3	0	1	1	1	42	0	0	0	0	0	0	0	0	0	#NULL!	0	3741	3741	3741	3741
361141	08.12.2008	74	2	1	1.2	165	75	62.9048	1	0	2	1	1	1	1	0	0	1	1	1	0	0	0	0	2	0	2	0	3	0	1	0	2	35	0	0	0	0	0	0	0	0	0	#NULL!	1	1516	1516	1516	1516
4297625	12.12.2008	78	2	2	0.73	155	52	82.281	1	0	3	1	1	0	0	0	0	0	0	1	0	0	0	0	1	0	2	3	3	0	1	0	2	35	0	0	0	0	0	0	0	0	0	#NULL!	0	1512	1512	1512	1512
6748344	08.01.2008	49	0	2	1.03	155	68	60.7778	1	0	2	1	2	0	0	0	0	0	0	0	1	1	0	0	1	0	2	2	3	0	1	1	2	35	0	0	0	0	0	0	0	0	0	#NULL!	0	1851	1851	1851	1851
5943434	20.06.2005	38	0	1	0.88	175	75	103.011	0	0	2	1	#NULL!	0	0	0	0	1	0	0	1	0	0	0	1	0	2	0	3	0	1	1	2	35	0	0	0	0	0	0	0	0	0	#NULL!	0	2783	2783	2783	2783
8000517790	19.01.2008	39	0	1	0.7	175	95	133.439	0	0	3	1	1	0	0	0	0	0	1	1	0	0	0	0	1	0	2	0	3	0	1	1	1	45	0	0	0	0	0	0	0	0	0	#NULL!	0	1840	1840	1840	1840
4505665	13.09.2003	55	0	1	1	#NULL!	62	82.4554	1	0	2	1	1.5	0	0	0	0	1	0	0	1	0	0	0	1	0	2	3	3	0	1	1	1	45	0	0	0	0	0	0	0	0	0	#NULL!	0	3429	3429	3429	3429
362682	02.02.2008	70	2	1	0.83	170	70	97.3513	0	0	3	1	6	0	0	0	0	0	0	1	0	1	0	0	2	0	2	0	3	0	1	0	0	55	0	0	0	0	0	0	0	0	0	#NULL!	1	1826	1826	1826	1826
1037652	27.05.2008	73	2	1	0.88	160	67	90.2247	0	0	3	1	10	0	0	0	0	0	1	1	2	1	0	0	1	0	2	0	3	0	1	0	1	45	0	0	0	0	0	0	0	0	0	#NULL!	0	1711	1711	1711	1711
2281983	09.10.2009	41	0	1	0.96	175	81	91.7438	0	0	2	1	1	0	0	0	0	1	0	0	1	1	0	0	1	0	2	3	3	0	1	0	0	55	0	0	0	0	0	0	0	0	0	#NULL!	0	1211	1211	1118	1118
5068943	25.12.2002	51	0	1	1.1	170	80	75.0083	1	0	2	1	1	1	0	0	0	1	0	1	1	0	0	0	1	0	2	3	3	0	1	0	2	35	0	0	0	0	0	0	0	0	0	#NULL!	0	3691	3691	3691	3691
5429117	25.12.2007	50	0	1	0.92	170	88	92.5573	0	0	2	1	2.5	0	0	0	0	0	0	0	1	0	0	0	2	0	2	3	3	0	1	1	1	45	0	0	0	0	0	0	0	0	0	#NULL!	1	1865	1865	1865	1865
298833	15.10.2003	67	2	1	0.9	172	70	89.459	1	0	2	1	1.5	0	0	0	0	0	0	1	0	0	0	0	1	0	2	0	3	0	1	1	0	50	0	0	0	0	0	0	0	0	0	#NULL!	0	3397	3397	3397	3397
2294629	06.01.2006	39	0	1	0.88	180	107	102.469	0	0	3	1	8	0	0	0	0	1	0	0	1	0	0	0	1	0	2	0	3	0	1	0	1	45	0	0	0	0	0	0	0	0	0	#NULL!	0	2583	2583	2583	2583
5729861	26.07.2007	45	0	1	0.82	170	75	107.987	0	0	2	1	2.5	0	0	0	0	0	0	0	1	1	0	0	1	0	2	0	3	0	1	1	0	55	0	0	0	0	0	0	0	0	0	#NULL!	0	2017	2017	2017	2017
930675	08.02.2003	69	2	1	1.09	170	69	71.2913	1	0	3	1	6	0	0	0	0	0	0	1	0	0	0	0	2	0	2	0	3	1	1	1	0	45	0	0	0	0	0	0	0	0	0	#NULL!	1	3646	3646	3646	3646
1092089	19.06.2004	59	0	1	0.72	169	65	118.759	0	0	2	1	5.5	0	0	0	0	1	1	0	1	0	0	0	3	2	2	0	3	0	1	1	2	35	0	0	0	0	0	0	0	0	0	#NULL!	1	3149	3149	3149	3149
31441882	28.09.2007	72	2	1	0.94	164	82	83.8465	1	0	2	1	5	0	0	0	0	0	0	1	0	0	0	0	2	0	2	0	3	0	1	1	1	45	0	0	0	0	0	0	0	0	0	#NULL!	1	1953	1953	1953	1953
911500	13.06.2009	84	2	2	0.85	158	55	67.7234	1	0	1	1	1.5	0	0	0	0	0	1	1	0	1	1	0	1	0	2	3	3	0	1	0	1	45	0	0	0	0	0	0	0	0	0	#NULL!	0	1329	1329	1329	1329
30725569	14.03.2009	49	0	1	1	175	95	84.4118	1	0	2	1	2	0	0	0	0	0	1	1	2	0	0	0	1	0	2	3	3	0	1	1	0	55	0	0	0	0	0	0	0	0	0	#NULL!	0	1420	1420	1420	1420
1236762	09.03.2010	63	0	2	0.73	165	95	85.5808	1	0	2	1	3	0	0	0	0	1	1	1	1	1	0	0	1	0	2	1	3	0	1	0	0	55	0	0	0	0	0	0	0	0	0	#NULL!	0	1060	1060	1060	1060
5183089	29.05.2003	50	0	2	0.7	182	75	94.1419	0	0	2	1	2.5	0	0	0	0	1	0	1	1	1	0	0	3	2	2	0	3	0	1	1	1	45	0	0	0	0	0	0	0	0	0	#NULL!	1	3536	3536	3536	3536
6293783	12.09.2001	50	0	1	1.1	#NULL!	#NULL!	75.3104	1	0	2	1	1.3	0	0	0	0	0	0	0	1	1	0	0	1	0	2	0	3	0	1	1	1	45	0	0	0	0	0	0	0	0	0	#NULL!	0	4160	4160	4160	4160
2782877	12.11.2002	32	0	1	1.1	176	91	82.4518	1	0	2	1	3	0	0	0	0	0	0	0	0	1	0	0	1	0	2	2	3	0	1	1	0	50	0	0	0	0	0	0	0	0	0	#NULL!	0	3734	3734	3734	3734
4722664	06.03.2009	60	0	1	1.05	165	72	76.5765	1	0	2	1	5	0	0	0	0	0	1	0	0	1	0	0	3	2	2	0	3	0	1	0	0	55	0	0	0	0	0	0	0	0	0	#NULL!	1	1428	1428	1428	1428
779998	12.12.2008	58	0	1	0.83	172	87	101.14	0	0	3	1	4	0	0	0	0	0	0	0	1	1	0	0	2	0	2	0	3	0	1	1	1	45	0	0	0	0	0	0	0	0	0	#NULL!	1	1512	1512	1443	1443
5397800	15.01.2010	53	0	1	0.74	173	75	117.596	0	0	2	1	1	0	0	0	0	0	0	0	2	0	0	0	1	0	2	0	3	0	1	1	0	55	0	0	0	0	0	0	0	0	0	#NULL!	0	1113	1113	1113	1113
4200192	10.04.2003	56	0	1	0.8	#NULL!	#NULL!	106.283	0	0	2	1	3	0	0	0	0	0	0	0	2	0	0	0	1	0	2	0	3	0	1	1	2	30	0	0	0	0	0	0	0	0	0	#NULL!	0	3585	3585	3585	3585
365650	27.11.2009	77	2	1	1.4	83	170	52.2304	2	3	2	1	4.5	0	0	0	0	0	1	0	1	0	0	0	2	0	2	3	3	0	1	1	2	35	0	0	0	0	0	0	0	0	0	#NULL!	1	1162	1162	1162	1162
31264149	10.10.2008	54	0	1	0.6	172	63	149.228	0	0	2	1	4	0	0	0	0	0	0	0	1	0	0	0	1	0	2	1	3	0	1	1	1	45	0	0	0	0	0	0	0	0	0	#NULL!	0	1575	1575	1575	1575
813695	22.11.2005	57	0	1	0.82	186	81	102.927	0	0	2	1	2	0	0	0	0	0	0	0	1	0	0	0	1	0	2	1	3	0	1	1	1	45	0	0	0	0	0	0	0	0	0	#NULL!	0	2628	2628	2628	2628
1673675	29.08.2006	50	0	1	1.18	176	95	69.4497	1	0	3	1	10	0	0	0	0	1	1	1	0	1	0	0	1	0	2	0	3	0	1	1	0	55	0	0	0	0	0	0	0	0	0	#NULL!	0	2348	2348	2348	2348
5364014	04.09.2005	48	0	1	0.89	173	75	96.9672	0	0	2	1	5	0	0	0	0	0	0	0	1	1	0	0	3	2	2	0	3	0	1	1	1	45	0	0	0	0	0	0	0	0	0	#NULL!	1	2707	2707	2707	2707
7504706	09.03.2007	64	0	1	0.79	167	100	104.953	0	0	2	1	1.5	1	1	0	0	1	0	0	1	1	0	0	2	0	2	3	3	0	1	1	2	45	0	0	0	0	0	0	0	0	0	#NULL!	1	2156	2156	2156	2156
5560692	09.01.2005	54	0	1	0.69	160	54	127	0	0	2	1	24	0	0	0	0	1	0	0	1	0	0	0	1	0	2	0	3	0	1	1	2	30	0	0	0	0	0	0	0	0	0	#NULL!	0	2945	2945	2554	2554
5204995	25.12.2005	51	0	1	0.93	173	75	91.0431	0	0	3	1	1	0	0	0	0	0	0	0	0	1	0	0	2	0	2	0	3	0	1	1	2	35	0	0	0	0	0	0	0	0	0	#NULL!	1	2595	2595	2595	2595
6765422	23.02.2003	56	0	1	0.8	167	77	106.283	0	0	2	1	1.5	1	0	0	0	0	0	0	1	1	0	0	1	0	2	0	3	0	1	1	2	35	0	0	0	0	0	0	0	0	0	#NULL!	0	3631	3631	3631	3631
31720762	28.11.2007	52	0	1	0.84	171	100	101.987	0	0	2	1	4	0	0	0	0	0	0	1	1	1	0	0	1	0	2	0	3	0	1	1	0	55	0	0	0	0	0	0	0	0	0	#NULL!	0	1892	1892	1892	1892
32091958	14.05.2003	55	0	1	1.19	#NULL!	89	67.4587	1	0	2	1	#NULL!	1	0	0	0	0	0	0	1	1	0	0	2	0	2	0	3	0	1	1	2	35	0	0	0	0	0	0	0	0	0	#NULL!	1	3551	3551	3551	3551
30385481	05.08.2009	53	0	1	0.7	171	91	125.384	0	0	2	1	2	0	0	0	0	0	0	0	1	1	0	0	1	0	2	2	3	1	1	1	1	45	0	0	0	0	0	0	0	0	0	#NULL!	0	1276	1276	1276	1276
31007825	20.05.2005	60	0	1	0.84	182	82	99.0672	0	0	2	1	2	0	0	0	0	1	0	0	1	0	0	0	1	0	2	2	3	0	1	1	2	35	0	0	0	0	0	0	0	0	0	#NULL!	0	2814	2814	2814	2814
4786584	05.11.2007	60	0	1	0.85	170	90	97.7235	0	0	2	1	1.5	0	0	0	0	1	0	0	1	0	0	0	1	0	2	1	3	0	1	1	1	45	0	0	0	0	0	0	0	0	0	#NULL!	0	1915	1915	1915	1915
76141	09.11.2006	58	0	1	0.9	169	80	92.1173	0	0	2	1	1	0	0	0	0	1	0	1	1	1	0	0	1	0	2	2	3	0	1	0	1	45	0	0	0	0	0	0	0	0	0	#NULL!	0	2276	2276	2276	2276
6877991	29.01.2007	52	0	1	0.86	170	82	99.2552	0	0	2	1	18	0	0	0	0	1	0	0	1	0	0	0	1	0	2	0	3	0	1	1	2	35	0	0	0	0	0	0	0	0	0	#NULL!	0	2195	2195	2195	2195
5612619	25.01.2006	47	0	1	0.93	174	75	92.5652	0	0	2	1	2	0	0	0	0	0	0	1	0	0	0	0	1	0	2	1	3	0	1	0	1	45	0	0	0	0	0	0	0	0	0	#NULL!	0	2564	2564	2564	2564
71500019	24.09.2007	32	0	1	1.13	188	105	79.931	1	0	2	1	1.5	0	0	0	0	1	1	1	1	1	0	0	1	0	2	3	3	0	1	1	0	55	0	0	0	0	0	0	0	0	0	#NULL!	0	1957	1957	1957	1957
4353080	08.01.2005	57	0	1	0.91	170	75	91.2718	0	0	3	1	1	0	0	0	0	1	0	1	0	1	0	0	1	0	2	0	3	0	1	1	0	45	0	0	0	0	0	0	0	0	0	#NULL!	0	2946	2946	2946	2946
30708035	17.07.2006	66	2	1	1.25	170	76	61.4202	1	0	3	1	0.5	1	0	0	0	1	0	1	0	1	0	0	1	0	2	1	2	1	0	1	0	55	0	0	0	0	0	0	0	0	0	#NULL!	0	2391	2391	2391	2391
7363511	08.02.2005	77	2	1	0.84	162	62	94.1753	0	0	3	1	2	0	0	0	0	0	0	0	0	0	0	0	1	0	2	2	3	0	1	1	1	45	0	0	0	0	0	0	0	0	0	#NULL!	0	2915	2915	2915	2915
1767697	28.01.2009	62	0	1	0.92	171	98	88.6026	1	0	2	1	1.5	1	0	0	0	0	0	1	2	1	0	0	1	0	2	1	3	0	1	1	0	55	0	0	0	0	0	0	0	0	0	#NULL!	0	1465	1465	1465	1465
5007659	06.08.2005	55	0	1	1.07	181	95	76.2624	1	0	3	1	2.2	0	0	0	0	0	0	1	0	1	0	0	1	0	2	3	3	0	1	1	1	45	0	0	0	0	0	0	0	0	0	#NULL!	0	2736	2736	2736	2736
1252645	05.10.2008	64	0	2	0.98	164	66	60.9733	1	0	2	1	3	0	0	0	0	0	0	0	0	1	0	0	2	0	2	0	3	0	1	0	0	55	0	0	0	0	0	0	0	0	0	#NULL!	1	1580	1580	1580	1580
6924003	27.09.2006	60	0	1	0.69	180	99	124.313	0	0	2	1	6	0	0	0	0	0	0	0	2	0	0	0	1	0	2	3	3	0	1	0	2	35	0	0	0	0	0	0	0	0	0	#NULL!	0	2319	2319	2319	2319
31031635	23.08.2007	74	2	1	1.18	165	65	64.1368	1	0	2	1	1	1	0	0	0	0	0	0	1	1	0	1	1	0	2	3	3	0	1	1	0	55	0	0	0	0	0	0	0	0	0	#NULL!	0	1989	1989	1989	1989
5658533	16.11.2008	48	0	1	0.94	180	118	91.0398	0	0	2	1	2	0	0	0	0	1	0	1	1	0	0	0	1	0	2	0	3	0	1	1	0	55	0	0	0	0	0	0	0	0	0	#NULL!	0	1538	1538	1538	1538
823825	29.10.2005	56	0	1	0.8	176	104	106.283	0	0	1	1	2	0	0	0	0	0	0	0	1	1	0	0	1	0	1	3	3	0	1	1	0	50	0	0	1	0	0	1	0	0	1	#NULL!	0	2652	2652	2652	194
1360563	24.11.2000	48	0	1	#NULL!	#NULL!	#NULL!	#NULL!	#NULL!	#NULL!	1	1	1.8	0	0	0	0	0	0	0	1	1	0	0	1	0	1	1	3	#NULL!	1	0	2	35	0	0	1	0	0	1	0	0	1	#NULL!	0	4452	4452	4452	187
5676502	17.01.2002	41	0	1	0.8	174	74	113.228	0	0	1	1	2	0	0	0	0	0	0	0	1	0	0	0	1	0	1	3	3	0	1	1	2	35	0	0	1	0	0	1	0	0	1	#NULL!	0	4033	4033	4033	280
31665219	18.12.2000	69	2	1	#NULL!	#NULL!	#NULL!	#NULL!	#NULL!	#NULL!	1	1	0.5	0	0	0	0	0	0	0	1	0	0	0	1	0	1	0	3	#NULL!	1	1	2	30	0	0	0	0	0	1	0	0	1	#NULL!	0	4428	4428	4428	426
3534846	03.03.2008	58	0	1	0.55	170	70	162.614	0	0	1	1	3	0	0	0	0	0	1	1	1	1	0	0	1	0	1	3	3	0	1	1	3	25	0	0	0	0	0	0	0	0	1	#NULL!	0	1796	1796	1796	436
5826227	19.10.2003	40	0	1	1.6	170	74	51.1376	2	3	1	1	0.15	0	0	0	0	0	0	0	0	0	0	0	1	0	1	0	3	0	1	1	0	50	0	0	0	0	0	1	0	0	1	#NULL!	0	3393	3393	3393	617
5841548	04.08.2008	44	0	1	0.95	180	87	91.5375	0	0	1	1	1	0	0	0	0	0	0	0	1	1	0	0	1	0	1	0	3	0	1	1	0	55	0	0	0	0	0	0	0	1	1	#NULL!	0	1642	1642	394	394
5878699	17.01.2008	43	0	1	0.96	185	93	90.8611	0	0	1	1	1.5	0	0	0	0	1	0	0	1	0	0	0	1	0	1	1	3	0	1	1	0	55	0	0	0	0	1	1	0	1	1	#NULL!	0	1842	1842	369	369
1229387	20.09.2007	66	2	1	0.67	170	70	126.141	0	0	1	1	24	0	0	0	0	0	1	0	0	0	0	0	1	0	1	0	3	0	1	0	2	35	0	0	0	0	1	1	0	1	1	#NULL!	0	1961	1961	564	564
5734940	09.04.2010	48	0	1	0.98	183	74	86.7653	1	0	1	1	1	0	0	0	0	1	0	0	1	1	0	0	1	0	1	1	3	0	1	0	0	55	0	0	0	0	0	1	0	0	1	#NULL!	0	1029	1029	1029	432
5164358	05.06.2004	52	0	1	0.8	166	63	107.894	0	0	3	1	12	0	0	0	0	1	0	0	1	0	0	0	1	0	1	0	3	0	1	1	2	30	0	0	0	0	0	1	0	0	1	#NULL!	0	3163	3163	3163	688
32060681	23.12.2005	44	0	1	0.82	173	65	108.48	0	0	1	1	#NULL!	0	0	0	0	1	0	0	1	1	0	0	1	0	1	0	3	0	1	1	2	35	0	0	0	0	1	1	0	1	1	#NULL!	0	2597	2597	465	465
2678529	25.06.2003	56	0	1	0.9	170	70	92.7758	0	0	1	1	1.5	0	0	0	0	0	0	0	1	1	0	0	1	0	1	1	3	1	1	1	2	35	0	0	0	0	0	1	0	0	1	#NULL!	0	3509	3509	3509	473
32170002	01.09.2006	36	0	1	0.83	180	110	111.421	0	0	1	1	0.75	0	0	0	0	1	0	0	1	0	0	0	1	0	1	0	3	0	1	1	1	45	0	0	0	0	1	1	0	1	1	#NULL!	0	2345	2345	796	796
5751503	28.01.2007	44	0	1	0.97	176	90	89.3629	1	0	1	1	3	0	0	0	0	1	0	0	0	0	0	0	1	0	1	0	3	0	1	1	2	45	0	0	1	0	0	1	0	0	1	#NULL!	0	2196	2196	2196	294
728342	15.08.2004	58	0	1	0.67	180	80	129.493	0	0	1	1	#NULL!	0	0	0	0	1	0	0	1	1	0	0	1	0	1	0	3	0	1	1	1	45	0	0	1	0	0	1	0	0	1	#NULL!	0	3092	3092	3092	572
31737210	28.06.2009	56	0	1	1.18	185	77	67.8702	1	0	1	1	3	0	0	0	0	0	0	0	1	0	0	0	1	0	1	3	3	0	1	1	2	35	0	1	1	0	1	1	0	1	1	#NULL!	0	1314	1314	300	300
7032774	04.02.2009	73	2	1	0.87	182	73	91.4225	0	0	1	1	0.5	0	0	0	0	1	1	1	0	0	0	0	1	0	1	2	3	0	1	0	0	55	0	0	1	0	0	1	0	0	1	#NULL!	0	1458	1458	1458	305
723498	17.04.2007	59	0	1	0.79	168	86	106.701	0	0	1	1	1	0	0	0	0	1	0	1	0	0	0	0	1	0	1	2	3	0	1	0	1	45	0	0	0	0	0	0	0	0	1	#NULL!	0	2117	2117	2117	940
32198857	23.08.2001	53	0	1	1.2	175	80	67.3147	1	0	1	1	6.6	0	0	0	0	1	1	0	1	1	0	0	1	0	1	0	3	0	1	1	2	30	0	1	1	0	1	1	0	1	1	#NULL!	0	4180	4180	532	532
2230994	26.10.2002	35	0	1	1.4	173	67	61.2965	1	0	1	1	1.5	0	0	0	0	1	0	1	1	0	0	0	1	0	1	0	3	0	1	1	2	30	0	0	1	0	0	1	0	0	1	#NULL!	0	3751	3751	3751	340
830367	30.08.2006	68	2	1	1.3	175	94	58.3476	2	3	1	1	3	1	1	0	0	0	1	1	1	1	0	0	2	0	1	0	3	0	1	1	0	55	0	0	0	0	0	0	0	1	1	#NULL!	1	2347	2347	1423	1423
347181	12.04.2008	61	0	1	4	167	100	16.3047	3	3	1	1	2	1	1	0	0	0	1	1	0	1	0	0	2	0	1	3	3	0	1	0	0	55	0	0	1	0	0	1	0	0	1	#NULL!	1	1756	1756	1756	276
952908	15.06.2008	59	0	2	0.74	170	72	85.7221	1	0	1	1	1	1	0	0	0	0	0	1	1	1	0	0	1	0	1	0	3	1	1	1	3	25	0	0	0	0	0	0	0	1	1	#NULL!	0	1692	1692	750	750
424109	28.05.2002	59	0	1	1	#NULL!	71	81.2887	1	0	1	1	1	0	0	0	0	0	0	1	0	1	0	0	2	0	1	0	3	0	1	1	0	55	0	0	0	0	0	1	0	0	1	#NULL!	1	3902	3902	3902	1125
749197	29.10.2007	59	0	1	1.14	180	100	69.8814	1	0	1	1	3	0	0	0	0	1	1	1	2	0	0	0	2	0	1	3	3	0	1	1	3	25	0	0	0	0	0	1	0	0	1	#NULL!	1	1922	1922	1431	281
6556145	18.12.2003	58	0	1	0.5	156	68	181.52	0	0	1	1	5	0	0	0	0	0	1	1	1	1	0	0	1	0	1	0	3	0	1	1	1	45	0	0	0	0	0	1	0	0	1	#NULL!	0	3333	3333	3333	651
1527981	09.04.2005	52	0	2	0.89	180	90	70.79	1	0	1	1	1.5	0	0	0	0	1	0	1	0	1	0	0	1	0	1	2	2	0	0	1	2	35	0	0	0	0	0	0	0	0	1	#NULL!	0	2855	2855	2855	1073
5292547	05.05.2004	49	0	1	1	171	115	84.4118	1	0	1	1	#NULL!	1	1	0	0	0	1	0	0	0	0	0	1	0	1	0	3	0	1	#NULL!	3	25	0	0	0	0	1	1	0	1	1	#NULL!	0	3194	3194	691	691
5973692	18.05.2002	37	0	1	0.7	180	87	134.873	0	0	1	1	5	0	0	0	0	1	0	0	1	1	0	0	1	0	1	0	3	0	1	1	2	30	0	0	1	0	0	1	0	0	1	#NULL!	0	3912	3912	3912	287
56360	01.09.2002	64	0	2	0.75	166	75	82.6878	1	0	3	1	2.5	0	0	0	0	0	1	1	0	1	0	0	3	2	1	0	3	0	1	1	0	55	0	0	1	0	0	1	0	0	1	#NULL!	1	3806	3806	3806	334
32123909	26.01.2009	37	0	2	0.63	150	48	113.014	0	0	1	1	5	0	0	0	0	0	0	0	2	0	0	0	1	0	1	0	3	0	1	1	2	35	0	0	0	0	0	1	0	0	1	#NULL!	0	1467	1467	1467	385
475366	30.06.2003	68	2	1	0.9	179	100	89.1903	1	0	1	1	3	0	0	0	0	0	1	0	1	0	0	0	3	2	1	0	3	0	1	1	1	45	0	0	0	0	0	1	0	0	1	#NULL!	1	3504	3504	3504	408
5092126	25.04.2010	57	0	1	0.98	184	93	83.7906	1	0	3	1	2	0	0	0	0	0	0	1	1	1	0	0	1	0	1	3	3	0	1	0	0	55	0	0	0	0	1	1	0	1	1	#NULL!	0	1013	1013	645	645
5771455	16.03.2009	46	0	1	0.94	176	73	91.8298	0	0	1	1	6	0	0	0	0	1	0	0	1	0	0	0	1	0	1	3	3	0	1	1	2	55	0	0	0	0	0	0	0	0	0	#NULL!	0	1418	1418	1418	1418
4166813	21.08.2000	78	2	1	#NULL!	#NULL!	#NULL!	#NULL!	#NULL!	#NULL!	1	1	4.6	0	0	0	0	0	1	0	1	0	0	0	1	0	1	0	3	#NULL!	1	1	1	42	0	0	0	0	0	0	0	0	0	#NULL!	0	4547	4547	4547	4547
746384	31.07.2000	77	2	2	1.4	#NULL!	#NULL!	38.755	2	3	1	1	2.5	0	0	0	0	0	1	0	0	0	0	0	1	0	1	3	3	#NULL!	1	0	2	30	0	0	0	0	0	0	0	0	0	#NULL!	0	4568	4568	4568	4568
1058403	10.03.2000	66	2	2	#NULL!	#NULL!	#NULL!	#NULL!	#NULL!	#NULL!	1	1	3	0	0	0	0	0	0	0	0	0	0	0	2	0	1	0	3	#NULL!	1	1	#NULL!	#NULL!	0	0	0	0	0	0	0	0	0	#NULL!	1	4711	4711	4711	4711
3061884	16.07.2000	77	2	2	#NULL!	#NULL!	#NULL!	#NULL!	#NULL!	#NULL!	1	1	2	0	0	0	0	0	0	0	0	0	0	0	1	0	1	0	3	#NULL!	1	1	#NULL!	35	0	0	0	0	0	0	0	0	0	#NULL!	0	4583	4583	4583	4583
5420024	05.03.2001	44	0	1	#NULL!	#NULL!	#NULL!	#NULL!	#NULL!	#NULL!	1	1	2	0	0	0	0	0	0	0	1	0	0	0	1	0	1	0	3	#NULL!	1	1	#NULL!	#NULL!	0	0	0	0	0	0	0	0	0	#NULL!	0	4351	4351	4351	4351
4146598	09.03.2000	70	2	2	#NULL!	#NULL!	#NULL!	#NULL!	#NULL!	#NULL!	1	1	9	0	0	0	0	0	1	0	0	1	0	0	1	0	1	2	3	#NULL!	1	0	2	35	0	0	0	0	0	0	0	0	0	#NULL!	0	4712	4712	4712	4712
1241530	28.07.2000	66	2	1	#NULL!	#NULL!	#NULL!	#NULL!	#NULL!	#NULL!	1	1	3	0	0	0	0	0	0	1	0	0	0	0	1	0	1	0	3	#NULL!	1	0	#NULL!	#NULL!	0	0	0	0	0	0	0	0	0	#NULL!	0	4571	4571	4571	4571
1043972	01.11.2000	59	0	1	#NULL!	#NULL!	#NULL!	#NULL!	#NULL!	#NULL!	1	1	4	0	0	0	0	0	0	0	0	0	0	0	1	0	1	1	3	#NULL!	1	1	2	30	0	0	0	0	0	0	0	0	0	#NULL!	0	4475	4475	4475	4475
894657	20.12.2000	53	0	1	#NULL!	#NULL!	#NULL!	#NULL!	#NULL!	#NULL!	1	1	3.5	0	0	0	0	0	0	0	0	0	0	0	1	0	1	0	3	#NULL!	1	0	#NULL!	#NULL!	0	0	0	0	0	0	0	0	0	#NULL!	0	4426	4426	4426	4426
3510747	26.02.2007	62	0	1	1.04	170	67	76.9132	1	0	1	1	1	0	0	0	0	0	0	0	1	0	0	0	1	0	1	3	3	0	1	0	1	50	0	0	0	0	0	0	0	0	0	#NULL!	0	2167	2167	2167	2167
5041475	13.05.2006	55	0	1	0.95	170	80	87.4835	1	0	1	1	36	0	0	0	0	1	0	0	1	1	0	0	1	0	1	0	3	0	1	1	2	35	0	0	0	0	0	0	0	0	0	#NULL!	0	2456	2456	2456	2456
155497	30.06.2010	72	2	1	1.22	167	70	62.0605	1	0	1	1	2	0	0	0	0	0	0	0	0	1	0	0	1	0	1	0	3	0	1	1	3	25	0	0	0	0	0	0	0	0	0	#NULL!	0	947	947	947	947
358894	27.11.2006	74	2	1	0.73	183	81	111.631	0	0	1	1	0.75	0	0	0	0	0	0	0	1	0	0	0	1	0	1	0	3	0	1	0	2	35	0	0	0	0	0	0	0	0	0	#NULL!	0	2258	2258	2258	2258
2692315	29.07.2007	54	0	1	0.82	160	56	104.063	0	0	1	1	12	0	0	0	0	1	0	1	1	0	0	0	3	2	1	0	3	0	1	1	2	35	0	0	0	0	0	0	0	0	0	#NULL!	1	2014	2014	2014	2014
4883394	19.01.2004	56	0	1	0.82	175	85	103.297	0	0	1	1	1	0	0	0	0	1	0	0	0	0	0	0	1	0	1	3	3	0	1	0	1	45	0	0	0	0	0	0	0	0	0	#NULL!	0	3301	3301	3301	3301
30609654	25.06.2009	57	0	1	0.98	170	72	83.7906	1	0	1	1	1	0	0	0	0	0	0	1	0	1	1	0	1	0	1	1	3	0	1	1	2	35	0	0	0	0	0	0	0	0	0	#NULL!	0	1317	1317	1317	1317
30878179	20.02.2004	76	2	1	1.89	175	108	37.04	2	3	1	1	1.5	0	0	0	0	0	1	1	0	1	0	0	1	0	1	0	3	0	1	1	2	30	0	0	0	0	0	0	0	0	0	#NULL!	0	3269	3269	3269	3269
5476011	26.02.2008	50	0	2	0.74	160	66	88.6513	1	0	1	1	6	0	0	0	0	1	0	1	1	0	0	0	2	0	1	0	3	0	1	1	2	55	0	0	0	0	0	0	0	0	0	#NULL!	1	1802	1802	1802	1802
5419867	03.03.2003	45	0	1	0.9	170	70	96.9873	0	0	1	1	1.4	0	0	0	0	0	0	0	0	0	0	0	1	0	1	1	3	1	1	1	1	45	0	0	0	0	0	0	0	0	0	#NULL!	0	3623	3623	3623	3623
5030834	11.04.2006	55	0	1	0.72	162	56	120.464	0	0	1	1	0.5	1	0	0	0	0	0	0	2	1	0	0	1	0	1	3	3	0	1	1	1	45	0	0	0	0	0	0	0	0	0	#NULL!	0	2488	2488	2488	2488
977168	02.03.2008	90	2	1	0.83	160	65	92.5093	0	0	1	1	4	0	0	0	0	0	0	0	0	0	0	0	1	0	1	2	3	0	1	0	3	25	0	0	0	0	0	0	0	0	0	#NULL!	0	1797	1797	1797	1797
7577954	09.08.2006	66	2	1	1.12	168	75	69.7185	1	0	1	1	3	0	0	0	0	0	1	1	2	1	0	0	2	0	1	1	3	0	1	1	2	35	0	0	0	0	0	0	0	0	0	#NULL!	1	2368	2368	2368	2368
6419515	22.10.2003	73	2	2	0.9	160	75	65.2329	1	0	1	1	1.5	0	0	0	0	0	0	0	0	0	0	0	1	0	1	3	3	0	1	1	1	45	0	0	0	0	0	0	0	0	0	#NULL!	0	3390	3390	3390	3390
6787807	01.03.2010	80	2	2	6.25	160	68	6.84139	3	3	1	1	3	0	0	0	0	0	1	1	0	1	0	0	1	0	1	3	3	0	1	0	2	35	0	0	0	0	0	0	0	0	0	#NULL!	0	1068	1068	1068	1068
5834550	14.04.2004	40	0	1	0.8	#NULL!	65	113.797	0	0	1	1	5.5	0	0	0	0	0	0	0	1	0	0	0	1	0	1	0	3	0	1	1	2	30	0	0	0	0	0	0	0	0	0	#NULL!	0	3215	3215	3215	3215
2252480	25.08.2002	36	0	1	0.9	180	90	101.482	0	0	1	1	2	0	0	0	0	0	0	0	1	0	0	0	1	0	1	3	3	0	1	1	0	45	0	0	0	0	0	0	0	0	0	#NULL!	0	3813	3813	3813	1492
5204862	14.11.2004	50	0	1	0.68	180	87	131.192	0	0	1	1	1.5	0	0	0	0	1	0	0	1	0	0	0	2	0	1	0	3	0	1	1	3	25	0	0	0	0	0	0	0	0	0	#NULL!	1	3001	3001	3001	3001
1480486	01.12.2009	66	2	1	0.86	170	84	94.5658	0	0	1	1	2	0	0	0	0	0	0	0	0	0	0	0	1	0	1	3	3	0	1	1	0	55	0	0	0	0	0	0	0	0	0	#NULL!	0	1158	1158	1158	1158
5535410	29.08.2009	51	0	1	0.6	169	63	150.97	0	0	1	1	1	0	0	0	0	0	0	0	1	0	0	0	1	0	1	2	3	0	1	1	2	35	0	0	0	0	0	0	0	0	0	#NULL!	0	1252	1252	1252	1252
5619582	12.03.2010	50	0	1	0.8	170	72	108.757	0	0	1	1	1	0	0	0	0	0	0	0	1	1	0	0	1	0	1	0	3	0	1	1	1	45	0	0	0	0	0	0	0	0	0	#NULL!	0	1057	1057	1057	1057
31054689	27.08.2001	55	0	1	1.3	#NULL!	#NULL!	60.9156	1	0	1	1	0.5	0	0	0	0	0	0	0	0	1	0	0	1	0	1	0	3	0	1	1	2	35	0	0	0	0	0	0	0	0	0	#NULL!	0	4176	4176	4176	4176
6468442	07.10.2004	47	0	1	0.8	180	110	110.131	0	0	1	1	4	0	0	0	0	1	0	1	1	0	0	0	1	0	1	3	3	0	1	1	2	30	0	0	0	0	0	0	0	0	0	#NULL!	0	3039	3039	3039	3039
6919479	19.04.2005	75	2	1	0.75	168	75	107.908	0	0	3	1	#NULL!	0	0	0	0	0	0	0	2	0	0	0	1	0	1	3	3	0	1	1	1	45	0	0	0	0	0	0	0	0	0	#NULL!	0	2845	2845	2845	2845
2230241	15.08.2006	40	0	1	1.16	180	104	74.1157	1	0	1	1	1	0	0	0	0	1	0	0	0	0	0	0	1	0	1	0	3	0	1	0	1	45	0	0	0	0	0	0	0	0	0	#NULL!	0	2362	2362	2362	2362
5224502	26.02.2003	48	0	2	0.7	#NULL!	56	94.9252	0	0	1	1	1.5	0	0	0	0	1	0	0	1	0	0	0	1	0	1	0	3	0	1	1	1	45	0	0	0	0	0	0	0	0	0	#NULL!	0	3628	3628	3628	3628
5608268	28.11.2007	48	0	1	0.77	165	75	114.607	0	0	1	1	6	1	1	0	0	1	0	1	2	1	0	0	1	0	1	0	3	0	1	1	1	45	0	0	0	0	0	0	0	0	0	#NULL!	0	1892	1892	1892	1892
2994466	05.05.2007	30	0	1	0.8	160	65	120.64	0	0	1	1	2	0	0	0	0	0	0	0	1	0	0	0	1	0	1	3	3	0	1	1	0	55	0	0	0	0	0	0	0	0	0	#NULL!	0	2099	2099	2099	2099
30342093	27.02.2004	57	0	1	0.9	180	86	92.4431	0	0	1	1	6.5	0	0	0	0	0	1	0	0	0	0	0	1	0	1	0	3	0	1	1	2	30	0	0	0	0	0	0	0	0	0	#NULL!	0	3262	3262	3262	3262
4995016	23.11.2009	65	0	1	0.7	176	62	120.295	0	0	1	1	4	0	0	0	0	0	0	0	1	1	0	0	1	0	1	0	3	0	1	1	1	45	0	0	0	0	0	0	0	0	0	#NULL!	0	1166	1166	1166	1166
6469986	21.12.2002	52	0	1	0.7	182	85	125.87	0	0	1	1	30	0	0	0	0	0	0	1	0	0	0	0	1	0	1	0	3	0	1	1	2	30	0	0	0	0	0	0	0	0	0	#NULL!	0	3695	3695	3695	3695
3521227	25.11.2001	67	2	1	1	#NULL!	#NULL!	79.2172	1	0	1	1	1	0	0	0	0	0	0	0	1	0	0	0	1	0	1	0	3	0	1	1	2	25	0	0	0	0	0	0	0	0	0	#NULL!	0	4086	4086	4086	4086
5071343	23.11.2001	50	0	1	1	#NULL!	#NULL!	84.0663	1	0	1	1	1.5	0	0	0	0	0	0	0	1	0	0	0	1	0	1	0	3	0	1	1	2	30	0	0	0	0	0	0	0	0	0	#NULL!	0	4088	4088	4088	4088
2673985	21.11.2003	60	0	1	0.9	170	75	91.4855	0	0	1	1	1	0	0	0	0	0	0	0	0	1	0	0	1	0	1	0	2	0	0	1	2	30	0	0	0	0	0	0	0	0	0	#NULL!	0	3360	3360	3360	3360
8200300407	22.09.2003	39	0	1	0.8	170	70	114.383	0	0	1	1	1	0	0	0	0	1	1	0	1	0	0	0	1	0	1	2	3	0	1	1	0	45	0	0	0	0	0	0	0	0	0	#NULL!	0	3420	3420	3420	3420
4600494	27.04.2007	69	2	1	0.65	163	60	129.457	0	0	1	1	1.5	0	0	0	0	1	0	0	0	0	0	0	1	0	1	0	3	0	1	1	2	35	0	0	0	0	0	0	0	0	0	#NULL!	0	2107	2107	2107	2107
4158413	03.05.2010	73	2	1	0.88	172	79	90.2247	0	0	2	1	5	0	0	0	0	0	1	1	2	1	1	1	1	0	1	0	3	0	1	0	0	55	0	0	0	0	0	0	0	0	0	#NULL!	0	1005	1005	1005	1005
30601679	24.02.2009	60	0	1	1.11	176	80	71.82	1	0	1	1	1	0	0	0	0	0	0	1	0	1	0	0	1	0	1	2	3	0	1	0	0	55	0	0	0	0	0	0	0	0	0	#NULL!	0	1438	1438	1438	1438
5072183	14.11.2006	55	0	1	1.27	170	75	62.5792	1	0	1	1	2	0	0	0	0	0	1	0	0	0	0	0	1	0	1	0	3	0	1	1	2	35	0	0	0	0	0	0	0	0	0	#NULL!	0	2271	2271	2271	2271
5620499	18.06.2002	41	0	2	0.7	#NULL!	#NULL!	98.0119	0	0	1	1	7	0	0	0	0	1	0	0	1	0	0	0	1	0	1	0	3	0	1	1	1	35	0	0	0	0	0	0	0	0	0	#NULL!	0	3881	3881	3881	3881
5476756	09.04.2005	48	0	1	0.64	176	75	141.87	0	0	1	1	3	0	0	0	0	1	1	0	2	0	0	0	1	0	1	3	3	0	1	1	2	35	0	0	0	0	0	0	0	0	0	#NULL!	0	2855	2855	2855	2855
5578811	23.10.2009	49	0	1	1.16	165	65	71.1244	1	0	1	1	8	0	0	0	0	1	0	0	1	0	0	0	2	0	1	0	3	0	1	1	1	45	0	0	0	0	0	0	0	0	0	#NULL!	1	1197	1197	1197	1197
8969202172	22.02.2007	38	0	2	#NULL!	165	70	#NULL!	#NULL!	#NULL!	1	1	8	0	0	0	0	1	0	0	1	0	0	0	1	0	1	1	3	0	1	1	3	25	0	0	0	0	0	0	0	0	0	#NULL!	0	2171	2171	2171	2171
7194631	13.10.2009	73	2	2	0.61	100	54	102.186	0	0	1	1	1.5	0	0	0	0	0	0	1	0	1	0	0	1	0	1	0	3	0	1	0	0	55	0	0	0	0	0	0	0	0	0	#NULL!	0	1207	1207	1207	1207
375690	16.03.2010	71	2	1	0.84	168	74	95.7391	0	0	1	1	1	0	0	0	0	1	1	1	0	0	0	0	1	0	1	0	3	0	1	0	0	55	0	0	0	0	0	0	0	0	0	#NULL!	0	1053	1053	1053	1053
6871164	29.11.2004	49	0	2	0.67	165	77	99.4298	0	0	1	1	3	0	0	0	0	0	0	0	0	0	0	0	1	0	1	0	3	0	1	1	2	30	0	0	0	0	0	0	0	0	0	#NULL!	0	2986	2986	2986	2986
5073388	08.09.2003	52	0	1	0.8	185	103	107.894	0	0	1	1	8	0	0	0	0	1	1	0	2	1	0	1	1	0	1	0	3	0	1	1	1	45	0	0	0	0	0	0	0	0	0	#NULL!	0	3434	3434	3434	3434
30885526	10.07.2007	57	0	1	0.77	172	80	110.678	0	0	1	1	1.5	0	0	0	0	0	0	1	0	0	0	0	1	0	1	3	3	0	1	1	2	35	0	0	0	0	0	0	0	0	0	#NULL!	0	2033	2033	2033	2033
6917253	10.05.2005	64	0	1	7.89	165	100	7.37278	3	3	1	1	#NULL!	1	0	0	1	0	1	1	0	1	0	0	3	2	1	1	2	1	0	0	2	35	0	0	0	0	0	0	0	0	0	#NULL!	1	2824	2824	2824	2824
907838	28.02.2004	58	0	2	1	#NULL!	94	60.5259	1	0	1	1	2.5	0	0	0	0	0	1	0	1	1	0	0	1	0	1	3	3	0	1	1	1	45	0	0	0	0	0	0	0	0	0	#NULL!	0	3261	3261	3261	3261
5030532	05.08.2009	58	0	1	0.9	176	112	92.1173	0	0	1	1	2	0	0	0	0	0	0	0	0	0	0	0	1	0	1	2	3	1	1	1	2	35	0	0	0	0	0	0	0	0	0	#NULL!	0	1276	1276	1276	1276
4330057	23.07.2009	70	2	1	4.7	170	70	13.1631	3	3	1	1	2	0	1	0	0	0	1	1	0	1	0	0	3	2	1	0	3	0	1	0	2	35	0	0	0	0	0	0	0	0	0	#NULL!	1	1289	1289	1289	1289
5510890	03.09.2010	52	0	2	0.8	160	80	80.0576	1	0	3	1	5	0	0	0	0	1	1	1	1	1	0	1	1	0	1	3	3	0	1	0	1	45	0	0	0	0	0	0	0	0	0	#NULL!	0	882	882	882	882
594786	26.03.2007	59	0	1	0.9	172	97	91.7982	0	0	1	1	1.5	0	0	0	0	1	0	0	2	0	0	0	1	0	1	2	3	1	1	1	2	35	0	0	0	0	0	0	0	0	0	#NULL!	0	2139	2139	2139	2139
4197299	14.04.2005	64	0	1	1.07	170	72	73.9519	1	0	1	1	6	0	0	0	0	0	1	0	0	0	0	0	1	0	1	0	3	0	1	1	3	25	0	0	0	0	0	0	0	0	0	#NULL!	0	2850	2850	2850	2850
5455451	14.07.2003	47	0	1	0.9	180	83	96.1349	0	0	1	1	1	0	0	0	0	0	0	0	1	1	0	0	1	0	1	2	3	0	1	1	0	45	0	0	0	0	0	0	0	0	0	#NULL!	0	3490	3490	3490	3490
1044760	22.06.2008	66	2	1	0.94	178	84	85.3407	1	0	1	1	1	0	0	0	0	0	0	1	1	1	0	0	2	0	1	3	3	0	1	0	1	45	0	0	0	0	0	0	0	0	0	#NULL!	1	1685	1685	1685	1685
3037591	24.05.2006	57	0	1	0.73	180	83	117.705	0	0	1	1	1	0	0	0	0	0	0	0	0	1	0	0	1	0	1	0	3	0	1	0	0	55	0	0	0	0	0	0	0	0	0	#NULL!	0	2445	2445	2445	2445
5090992	18.09.2003	51	0	1	1	168	87	83.7291	1	0	1	1	4.5	0	0	0	0	1	0	0	1	0	0	0	1	0	1	0	3	0	1	1	2	30	0	0	0	0	0	0	0	0	0	#NULL!	0	3424	3424	3424	3424
5502767	28.08.2001	44	0	1	0.9	#NULL!	#NULL!	97.4308	0	0	1	1	1.6	0	0	0	0	1	0	0	1	1	0	0	1	0	1	0	3	0	1	1	1	42	0	0	0	0	0	0	0	0	0	#NULL!	0	4175	4175	4175	4175
5464389	09.12.2007	50	0	1	0.99	176	83	85.047	1	0	1	1	2	1	1	0	0	0	0	1	0	0	0	0	3	2	1	0	3	0	1	1	2	35	0	0	0	0	0	0	0	0	0	#NULL!	1	1881	1881	1881	1881
899588	23.02.2003	59	0	1	0.7	175	77	122.684	0	0	1	1	2.25	0	0	0	0	1	0	0	1	0	0	0	1	0	1	2	3	0	1	#NULL!	0	50	0	0	0	0	0	0	0	0	0	#NULL!	0	3631	3631	3631	3631
32169267	19.12.2008	61	0	1	0.81	168	80	102.967	0	0	1	1	4	0	0	0	0	0	1	1	0	0	0	0	2	0	1	0	3	0	1	1	1	45	0	0	0	0	0	0	0	0	0	#NULL!	1	1505	1505	1505	1505
7074393	15.05.2003	56	0	1	0.7	166	90	123.99	0	0	1	1	3	0	0	0	0	0	1	0	1	1	0	1	3	2	1	0	3	0	1	1	2	30	0	0	0	0	0	0	0	0	0	#NULL!	1	3550	3550	3550	3550
5463679	01.11.2008	52	0	1	1.03	176	94	80.6028	1	0	1	1	1	0	0	0	0	0	0	0	0	1	0	0	1	0	1	1	3	0	1	1	1	45	0	0	0	0	0	0	0	0	0	#NULL!	0	1553	1553	1553	1553
5588870	07.08.2004	45	0	1	0.7	172	78	129.619	0	0	1	1	5.5	0	0	0	0	0	0	0	1	0	0	0	1	0	1	0	3	0	1	1	2	30	0	0	0	0	0	0	0	0	0	#NULL!	0	3100	3100	3100	3100
6564808	21.09.2005	50	0	1	0.66	170	85	135.79	0	0	1	1	24	0	0	0	0	1	1	0	1	1	0	0	1	0	1	0	3	0	1	1	2	35	0	0	0	0	0	0	0	0	0	#NULL!	0	2690	2690	2690	2690
31056089	27.09.2006	52	0	1	0.9	180	90	94.1821	0	0	1	1	16	0	0	0	0	0	1	1	2	1	0	0	1	0	1	3	3	0	1	0	0	55	0	0	0	0	0	0	0	0	0	#NULL!	0	2319	2319	2319	2319
6977510	28.11.2005	73	2	2	0.92	154	55	63.5991	1	0	1	1	4	0	0	0	0	0	0	1	0	1	0	0	1	0	1	2	3	0	1	1	0	55	0	0	0	0	0	0	0	0	0	#NULL!	0	2622	2622	2622	2622
30374632	18.08.2010	62	0	1	0.91	172	95	89.7271	1	0	1	1	2	0	0	0	0	0	0	0	1	1	0	0	1	0	1	0	3	0	1	1	2	35	0	0	0	0	0	0	0	0	0	#NULL!	0	898	898	898	898
30617971	03.01.2007	52	0	1	1.34	164	70	59.4957	2	3	1	1	0.5	0	0	0	0	1	0	0	0	0	0	0	1	0	1	2	3	0	1	0	2	35	0	0	0	0	0	0	0	0	0	#NULL!	0	2221	2221	2221	2221
5836175	09.08.2010	46	0	1	0.86	180	80	101.756	0	0	1	1	2	0	0	0	0	0	0	0	1	0	0	0	1	0	1	2	3	0	1	1	2	35	0	0	0	0	0	0	0	0	0	#NULL!	0	907	907	907	907
31763759	01.08.2006	54	0	1	0.96	174	84	86.7553	1	0	1	1	4	0	0	0	0	1	0	1	1	1	0	0	1	0	1	2	3	0	1	1	1	45	0	0	0	0	0	0	0	0	0	#NULL!	0	2376	2376	2376	2376
5868565	16.09.2003	39	0	1	1	183	89	88.4152	1	0	1	1	2	0	0	0	0	1	1	1	0	1	0	0	1	0	1	3	3	0	1	1	0	45	0	0	0	0	0	0	0	0	0	#NULL!	0	3426	3426	3426	3426
7338646	05.08.2008	58	0	1	0.98	180	82	83.4953	1	0	1	1	2	0	0	0	0	0	0	0	2	1	0	0	3	2	1	2	3	0	1	1	1	45	0	0	0	0	0	0	0	0	0	#NULL!	1	1641	1641	1641	1641
2536917	24.04.2007	33	0	1	0.68	165	60	142.738	0	0	1	1	3	0	0	0	0	0	0	0	1	0	0	0	1	0	1	0	3	0	1	1	2	45	0	0	0	0	0	0	0	0	0	#NULL!	0	2110	2110	2110	2110
374614	15.08.2001	56	0	1	1.5	#NULL!	#NULL!	51.4543	2	3	1	1	2.5	0	0	0	0	0	0	0	0	0	0	0	2	0	1	0	3	0	1	1	2	35	0	0	0	0	0	0	0	0	0	#NULL!	1	4188	4188	4188	4188
5800888	07.03.2008	44	0	1	0.9	184	110	97.4308	0	0	1	1	0.5	0	0	0	0	0	0	0	1	0	0	0	1	0	1	0	3	0	1	1	2	35	0	0	0	0	0	0	0	0	0	#NULL!	0	1792	1792	1792	1792
2504317	16.08.2006	33	0	1	0.85	175	70	110.333	0	0	1	1	4	0	0	0	0	0	0	0	1	0	0	0	1	0	1	3	3	0	1	1	2	35	0	0	0	0	0	0	0	0	0	#NULL!	0	2361	2361	2361	2361
31167646	06.05.2007	34	0	1	0.75	172	73	126.707	0	0	1	1	1	0	0	0	0	1	0	0	0	1	0	0	1	0	1	0	3	0	1	1	2	35	0	0	0	0	0	0	0	0	0	#NULL!	0	2098	2098	2098	2098
386045	01.05.2009	72	2	2	0.96	156	67	60.7208	1	0	1	1	3	0	0	0	0	0	0	1	2	1	0	0	1	0	1	1	3	0	1	1	0	55	0	0	0	0	0	0	0	0	0	#NULL!	0	1372	1372	1372	1372
58065	10.03.2008	62	0	1	6.25	180	105	9.70984	3	3	1	1	1	0	1	0	0	0	0	0	0	1	0	0	1	0	1	3	3	0	1	0	0	55	0	0	0	0	0	0	0	0	0	#NULL!	0	1789	1789	1789	1789
6483631	28.12.2005	74	2	2	0.59	150	43	105.901	0	0	1	1	24	0	0	0	0	0	0	1	0	1	0	0	1	0	1	0	3	0	1	1	2	35	0	0	0	0	0	0	0	0	0	#NULL!	0	2592	2592	2592	2592
4136459	03.03.2009	60	0	2	0.59	160	60	110.507	0	0	1	1	3	0	0	0	0	1	1	1	1	1	0	0	1	0	1	0	3	0	1	1	1	55	0	0	0	0	0	0	0	0	0	#NULL!	0	1431	1431	1431	1431
898396	08.02.2006	61	0	1	1	#NULL!	#NULL!	80.7404	1	0	1	1	5	0	0	0	0	0	0	0	0	0	0	0	2	0	1	3	3	0	1	1	2	35	0	0	0	0	0	0	0	0	0	#NULL!	1	2550	2550	2550	2550
5057926	30.03.2008	57	0	1	0.9	170	73	92.4431	0	0	1	1	96	0	0	0	0	0	0	0	1	0	0	0	1	0	1	2	3	0	1	0	2	35	0	0	0	0	0	0	0	0	0	#NULL!	0	1769	1769	1769	1769
30874494	08.05.2010	70	2	1	0.8	87	195	101.576	0	0	2	1	1	0	0	0	0	0	0	1	0	1	0	0	1	0	1	2	3	0	1	1	2	35	0	0	0	0	0	0	0	0	0	#NULL!	0	1000	1000	1000	1000
371052	07.06.2008	70	2	1	1.11	179	80	69.6074	1	0	1	1	0.5	1	0	0	0	1	0	0	1	1	0	0	1	0	1	0	3	0	1	1	2	35	0	0	0	0	0	0	0	0	0	#NULL!	0	1700	1700	1700	1700
30371663	16.08.2005	49	0	2	0.75	163	85	87.2944	1	0	1	1	24	0	0	0	0	1	1	1	0	1	0	0	1	0	1	3	3	0	1	1	1	45	0	0	0	0	0	0	0	0	0	#NULL!	0	2726	2726	2726	2726
1047842	01.02.2009	60	0	1	1.07	170	86	74.9272	1	0	1	1	3	1	0	0	0	0	1	1	0	1	0	0	2	0	1	0	3	0	1	1	2	35	0	0	0	0	0	0	0	0	0	#NULL!	1	1461	1461	1461	1461
4360150	22.12.2004	55	0	1	0.79	174	80	108.232	0	0	1	1	4	0	0	0	0	1	0	0	2	0	0	0	1	0	1	3	3	0	1	1	0	55	0	0	0	0	0	0	0	0	0	#NULL!	0	2963	2963	2963	2963
7416277	02.05.2010	60	0	1	1.05	187	94	76.5765	1	0	1	1	2	0	0	0	0	0	0	0	1	0	0	0	1	0	1	3	3	0	1	0	0	55	0	0	0	0	0	0	0	0	0	#NULL!	0	1006	1006	1006	1006
5603701	09.12.2006	47	0	1	0.8	179	76	110.131	0	0	1	1	1	0	0	0	0	1	0	0	0	0	0	0	1	0	1	2	3	0	1	1	1	45	0	0	0	0	0	0	0	0	0	#NULL!	0	2246	2246	2246	2246
716497	28.02.2004	47	0	1	1.4	186	88	57.7358	2	3	1	1	3.5	0	0	0	0	0	0	0	0	1	0	0	1	0	1	3	3	0	1	1	1	45	0	0	0	0	0	0	0	0	0	#NULL!	0	3261	3261	3261	3261
5367817	11.05.2009	53	0	1	0.79	178	78	109.049	0	0	1	1	2	1	0	0	0	1	1	1	1	1	0	0	1	0	1	0	3	0	1	1	0	55	0	0	0	0	0	0	0	0	0	#NULL!	0	1362	1362	1362	1362
1685779	26.12.2009	78	2	1	1.7	169	90	41.637	2	3	1	1	4	1	1	0	0	0	1	1	0	1	0	0	1	0	1	2	3	0	1	1	0	55	0	0	0	0	0	0	0	0	0	#NULL!	0	1133	1133	1133	1133
6819095	22.10.2005	52	0	1	0.8	175	80	107.894	0	0	1	1	0.5	0	0	0	0	1	0	0	1	1	0	0	1	0	1	0	3	0	1	1	0	55	0	0	0	0	0	0	0	0	0	#NULL!	0	2659	2659	2659	2659
1728122	17.03.2008	33	0	1	1.02	170	81	89.3985	1	0	1	1	1	0	0	0	0	0	0	0	0	1	0	0	3	2	1	0	3	0	1	1	1	45	0	0	0	0	0	0	0	0	0	#NULL!	1	1782	1782	1782	1782
801963	06.06.2004	61	0	1	1.1	185	95	72.3309	1	0	1	1	3	0	0	0	0	1	0	1	0	0	0	0	1	0	1	2	3	1	1	#NULL!	2	30	0	0	0	0	0	0	0	0	0	#NULL!	0	3162	3162	3162	3162
5449066	25.11.2006	50	0	1	0.75	178	78	117.166	0	0	1	1	2	0	0	0	0	0	0	0	1	0	0	0	1	0	1	0	3	0	1	1	2	35	0	0	0	0	0	0	0	0	0	#NULL!	0	2260	2260	2260	2260
771360	14.04.2004	82	2	1	1.5	175	70	47.6211	2	3	1	1	1.5	0	0	0	0	0	0	1	0	0	0	0	1	0	1	3	3	0	1	1	2	30	0	0	0	0	0	0	0	0	0	#NULL!	0	3215	3215	3215	3215
31413087	04.03.2004	46	0	1	0.86	180	72	101.756	0	0	1	1	1	0	0	0	0	0	0	0	1	0	0	0	1	0	1	0	3	0	1	1	2	30	0	0	0	0	0	0	0	0	0	#NULL!	0	3256	3256	3256	3256
5132613	22.06.2005	52	0	1	0.8	168	92	107.894	0	0	1	1	1.5	0	0	0	0	0	1	0	1	0	0	0	3	2	1	0	3	0	1	1	2	35	0	0	0	0	0	0	0	0	0	#NULL!	1	2781	2781	2781	2781
6486978	12.11.2003	51	0	1	1	168	83	83.7291	1	0	1	1	0.5	0	0	0	0	1	0	0	0	1	0	0	1	0	1	0	3	0	1	1	1	45	0	0	0	0	0	0	0	0	0	#NULL!	0	3369	3369	3369	3369
1445519	14.02.2005	66	2	1	0.68	170	70	124.002	0	0	3	1	8	0	0	0	0	0	0	1	0	1	1	0	1	0	1	0	3	0	1	0	2	30	0	0	0	0	0	0	0	0	0	#NULL!	0	2909	2909	2909	2909
30047218	22.08.2008	21	0	1	0.95	181	120	106.368	0	0	3	1	0.5	0	0	0	0	0	0	0	1	0	0	0	1	0	1	0	3	0	1	1	2	35	0	0	0	0	0	0	0	0	0	#NULL!	0	1624	1624	1624	1624
30620414	10.02.2008	65	0	1	1	170	85	79.7061	1	0	1	1	2	1	1	0	0	0	0	1	1	1	0	1	1	0	1	3	3	0	1	1	2	35	0	0	0	0	0	0	0	0	0	#NULL!	0	1818	1818	1818	1818
4188592	26.05.2008	70	2	1	0.89	180	97	89.8177	1	0	1	1	5	0	0	0	0	1	1	1	2	0	0	0	1	0	1	0	3	0	1	1	0	55	0	0	0	0	0	0	0	0	0	#NULL!	0	1712	1712	1712	1712
6969073	04.02.2003	47	0	1	1.05	170	97	80.4683	1	0	1	1	3	0	0	0	0	0	0	0	1	0	0	0	1	0	1	2	3	0	1	1	1	45	0	0	0	0	0	0	0	0	0	#NULL!	0	3650	3650	3650	3650
5719167	01.04.2010	49	0	1	0.67	170	80	134.002	0	0	1	1	2	0	1	0	0	1	0	1	1	0	0	0	1	0	1	2	3	0	1	1	0	45	0	0	0	0	0	0	0	0	0	#NULL!	0	1037	1037	1037	1037
5387979	10.01.2005	48	0	1	0.6	175	70	152.839	0	0	1	1	0.5	0	0	0	0	0	0	0	1	0	0	0	1	0	1	0	3	0	1	1	0	50	0	0	0	0	0	0	0	0	0	#NULL!	0	2944	2944	2944	2944
2753832	31.07.2008	36	0	1	0.7	180	72	135.625	0	0	1	1	4.5	0	0	0	0	1	0	0	1	0	0	0	1	0	1	3	3	0	1	1	0	55	0	0	0	0	0	0	0	0	0	#NULL!	0	1646	1646	1646	1646
1593779	30.12.2005	45	0	1	0.92	178	75	94.5583	0	0	1	1	12	0	0	0	0	1	0	1	1	0	0	0	1	0	1	3	3	0	1	1	0	55	0	0	0	0	0	0	0	0	0	#NULL!	0	2590	2590	2590	2590
5867129	15.07.2009	45	0	1	0.82	183	72	107.987	0	0	1	1	4	0	0	0	0	0	0	0	1	0	0	0	1	0	1	0	3	0	1	1	2	35	0	0	0	0	0	0	0	0	0	#NULL!	0	1297	1297	1297	1297
7484927	13.06.2010	64	0	1	0.61	178	90	141.445	0	0	1	1	3.5	0	0	0	0	0	0	0	0	0	0	0	1	0	1	2	3	0	1	1	2	35	0	0	0	0	0	0	0	0	0	#NULL!	0	964	964	964	964
5539788	24.11.2009	51	0	1	0.88	170	65	97.0383	0	0	1	1	12	0	0	0	0	1	0	0	1	0	0	0	1	0	1	0	3	0	1	1	2	35	0	0	0	0	0	0	0	0	0	#NULL!	0	1165	1165	1165	1165
2680767	16.06.2007	65	0	1	0.88	171	87	92.3759	0	0	1	1	3	0	0	0	0	1	0	0	2	0	0	0	1	0	1	0	3	0	1	0	1	45	0	0	0	0	0	0	0	0	0	#NULL!	0	2057	2057	2057	2057
4655964	15.05.2003	65	0	1	1	174	74	79.7061	1	0	1	1	5	0	0	0	0	0	0	1	1	1	0	0	1	0	1	3	3	0	1	0	0	50	0	0	0	0	0	0	0	0	0	#NULL!	0	3550	3550	3550	3550
4107319	18.02.2007	70	2	1	0.85	165	72	94.7128	0	0	1	1	2	0	0	0	0	0	0	0	2	1	0	0	1	0	1	0	3	0	1	1	1	45	0	0	0	0	0	0	0	0	0	#NULL!	0	2175	2175	2175	2175
1770479	21.03.2008	42	0	1	0.65	178	89	143.183	0	0	1	1	1	0	0	0	0	0	0	1	1	1	0	0	1	0	1	0	3	0	1	1	0	55	0	0	0	0	0	0	0	0	0	#NULL!	0	1778	1778	1778	1778
3024822	16.09.2003	56	0	1	1.8	180	95	41.6914	2	3	1	1	1	0	0	0	0	0	0	1	1	0	0	0	1	0	1	3	3	0	1	1	1	45	0	0	0	0	0	0	0	0	0	#NULL!	0	3426	3426	3426	3426
5897832	02.04.2006	42	0	1	0.82	#NULL!	80	109.51	0	0	1	1	1	0	0	0	0	0	0	0	1	0	0	0	1	0	1	3	3	0	1	1	1	45	0	0	0	0	0	0	0	0	0	#NULL!	0	2497	2497	2497	2497
891858	22.01.2008	60	0	1	0.81	165	80	103.313	0	0	1	1	1	0	0	0	0	1	1	1	0	0	0	0	1	0	1	2	3	0	1	1	1	45	0	0	0	0	0	0	0	0	0	#NULL!	0	1837	1837	1837	1837
5332752	06.11.2001	47	0	1	1	#NULL!	#NULL!	85.1289	1	0	1	1	1	0	0	0	0	0	1	0	1	1	0	0	1	0	1	0	3	0	1	1	2	40	0	0	0	0	0	0	0	0	0	#NULL!	0	4105	4105	4105	4105
30920681	03.01.2006	55	0	1	0.86	157	78	98.1314	0	0	3	1	2	0	0	0	0	0	0	1	2	1	0	0	1	0	1	0	3	0	1	1	0	55	0	0	0	0	0	0	0	0	0	#NULL!	0	2586	2586	2586	2586
1412140	03.06.2009	52	0	1	0.8	170	72	107.894	0	0	3	1	2	1	1	0	0	0	0	0	2	1	0	0	1	0	1	0	3	0	1	0	0	55	0	0	0	0	0	0	0	0	0	#NULL!	0	1339	1339	1339	1339
30935181	20.10.2006	49	0	1	1.08	186	96	77.2382	1	0	1	1	2	0	0	0	0	1	0	1	1	1	0	0	1	0	1	1	3	0	1	1	2	35	0	0	0	0	0	0	0	0	0	#NULL!	0	2296	2296	2296	2296
32876490	09.01.2007	69	2	1	0.8	176	60	101.873	0	0	1	1	4	0	0	0	0	0	0	1	1	0	0	1	1	0	1	0	3	0	1	1	2	35	0	0	0	0	0	0	0	0	0	#NULL!	0	2215	2215	2215	2215
4791133	26.07.2002	65	0	1	0.8	178	80	103.116	0	0	1	1	4	0	0	0	0	0	1	0	1	0	0	0	1	0	1	0	2	0	0	0	3	20	0	0	0	0	0	0	0	0	0	#NULL!	0	3843	3843	3843	3843
4594231	12.11.2002	70	2	2	1.1	160	65	52.1909	2	3	1	1	0.75	0	0	0	0	0	0	0	1	0	0	0	1	0	1	0	3	0	1	1	2	30	0	0	0	0	0	0	0	0	0	07.08.2007	0	3734	1729	3734	1729
7202321	23.03.2004	73	2	2	0.8	170	80	74.7303	1	0	1	1	1	0	0	0	0	0	0	0	0	1	0	0	1	0	1	3	3	0	1	1	1	45	0	0	0	0	0	0	0	0	0	#NULL!	0	3237	3237	3237	3237
4256999	30.03.2004	73	2	2	0.6	160	62	104.154	0	0	1	1	7	0	0	0	0	0	1	1	2	0	0	0	1	0	1	0	3	0	1	1	2	30	0	0	0	0	0	0	0	0	0	#NULL!	0	3230	3230	3230	3230
268125	29.05.2003	76	2	1	0.8	178	80	99.8946	0	0	1	1	2	0	0	0	0	0	0	1	0	1	0	0	1	0	1	0	3	0	1	1	2	35	0	0	0	0	0	0	0	0	0	#NULL!	0	3536	3536	3536	3536
5794708	07.08.2005	42	0	1	0.69	170	80	133.648	0	0	1	1	2	0	0	0	0	1	0	0	0	0	0	0	1	0	1	0	3	0	1	1	2	35	0	0	0	0	0	0	0	0	0	#NULL!	0	2735	2735	2735	2735
4595045	12.09.2006	58	0	2	1.22	160	60	48.1151	2	3	1	1	4	0	0	0	0	1	0	1	0	0	0	0	2	0	1	0	3	0	1	0	2	35	0	0	0	0	0	0	0	0	0	#NULL!	1	2334	2334	2334	2334
6407373	19.11.2003	66	2	1	0.8	168	70	102.797	0	0	1	1	1	0	0	0	0	0	0	0	1	1	0	0	3	2	1	0	3	0	1	1	0	45	0	0	0	0	0	0	0	0	0	#NULL!	1	3362	3362	3362	3362
121620	29.08.2001	52	0	1	0.8	#NULL!	#NULL!	107.894	0	0	1	1	1	0	0	0	0	0	0	0	1	0	0	0	1	0	1	0	3	0	1	1	1	45	0	0	0	0	0	0	0	0	0	#NULL!	0	4174	4174	4174	4174
5011425	01.06.2008	58	0	1	0.83	170	70	101.14	0	0	1	1	2.5	0	0	0	0	0	0	0	1	0	0	0	1	0	1	0	3	0	1	1	2	35	0	0	0	0	0	0	0	0	0	#NULL!	0	1706	1706	1706	1706
4707753	28.06.2004	69	2	1	0.85	190	95	94.9898	0	0	1	1	4	0	0	0	0	1	0	1	0	0	0	0	1	0	1	0	2	0	0	1	2	30	0	0	0	0	0	0	0	0	0	#NULL!	0	3140	3140	3140	3140
4130743	28.04.2008	65	0	1	0.6	160	65	143.716	0	0	1	1	2	0	0	0	0	0	1	1	0	1	0	0	1	0	1	2	3	0	1	1	2	35	0	0	0	0	0	0	0	0	0	#NULL!	0	1740	1740	1740	1740
5224515	26.05.2005	51	0	2	0.61	164	62	109.903	0	0	1	1	8	0	0	0	0	0	1	0	1	1	0	0	1	0	1	0	3	0	1	1	3	25	0	0	0	0	0	0	0	0	0	#NULL!	0	2808	2808	2808	2808
32453147	10.10.2004	48	0	1	1	187	90	84.7659	1	0	1	1	3	0	0	0	0	1	0	1	1	0	0	0	1	0	1	0	3	0	1	1	2	30	0	0	0	0	0	0	0	0	0	#NULL!	0	3036	3036	3036	3036
4243682	14.01.2007	57	0	2	0.48	163	78	141.684	0	0	1	1	2	0	0	0	0	0	0	0	1	0	0	0	1	0	1	1	3	0	1	1	2	35	0	0	0	0	0	0	0	0	0	#NULL!	0	2210	2210	2210	2210
5841521	09.01.2008	43	0	2	1.04	160	80	61.719	1	0	1	1	1.5	0	0	0	0	1	0	0	1	0	0	0	1	0	1	3	3	0	1	1	2	35	0	0	0	0	0	0	0	0	0	#NULL!	0	1850	1850	1850	1850
3063562	20.12.2002	61	0	1	1.7	#NULL!	62	43.7676	2	3	1	1	10	0	0	0	0	0	0	1	1	0	0	0	3	2	1	3	3	0	1	1	2	30	0	0	0	0	0	0	0	0	0	#NULL!	1	3696	3696	3696	3696
5437347	04.01.2004	48	0	1	0.98	178	80	86.7653	1	0	1	1	2	0	0	0	0	0	0	0	1	1	0	0	1	0	1	0	3	0	1	0	1	45	0	0	0	0	0	0	0	0	0	#NULL!	0	3316	3316	1799	1799
5222619	25.05.2003	49	0	2	0.7	162	62	94.5287	0	0	1	1	1	0	0	0	0	0	0	0	1	0	0	0	1	0	1	1	3	0	1	1	1	50	0	0	0	0	0	0	0	0	0	#NULL!	0	3540	3540	3540	3540
5132114	05.07.2003	51	0	1	0.67	167	94	132.919	0	0	1	1	2	0	0	0	0	0	0	1	1	0	0	0	3	2	1	0	3	0	1	1	2	30	0	0	0	0	0	0	0	0	0	#NULL!	1	3499	3499	3499	3499
30866015	01.07.2008	58	0	1	0.77	153	56	110.288	0	0	1	1	2	0	0	0	0	1	1	0	0	0	0	0	1	0	1	0	3	0	1	1	2	35	0	0	0	0	0	0	0	0	0	#NULL!	0	1676	1676	1676	1676
5066792	18.10.2001	51	0	1	1.2	#NULL!	#NULL!	67.8424	1	0	1	1	15	#NULL!	0	0	0	1	0	0	0	1	0	0	1	0	1	0	3	0	1	1	2	35	0	0	0	0	0	0	0	0	0	#NULL!	0	4124	4124	4124	4124
164129	09.10.2005	79	2	1	0.68	169	79	119.558	0	0	1	1	3	0	0	0	0	0	0	0	2	0	0	0	1	0	1	0	3	0	1	1	1	45	0	0	0	0	0	0	0	0	0	#NULL!	0	2672	2672	2672	2672
31286393	21.04.2008	48	0	1	1.07	174	95	78.3993	1	0	1	1	3	0	0	0	0	0	0	0	1	0	0	0	1	0	1	2	3	0	1	0	2	35	0	0	0	0	0	0	0	0	0	#NULL!	0	1747	1747	1747	1747
6538747	24.07.2008	65	0	1	0.98	172	85	81.5862	1	0	3	1	3.5	0	0	0	0	0	1	1	1	0	0	0	1	0	1	0	3	0	1	1	0	55	0	0	0	0	0	0	0	0	0	#NULL!	0	1653	1653	1653	1653
30456652	16.07.2003	48	0	1	0.9	180	100	95.7249	0	0	1	1	4.5	0	0	0	0	0	0	0	1	1	0	0	1	0	1	0	3	0	1	0	1	45	0	0	0	0	0	0	0	0	0	#NULL!	0	3488	3488	3488	3488
4601654	13.05.2007	63	0	2	0.71	167	64	88.726	1	0	1	1	2	0	0	0	0	0	0	1	0	1	0	0	2	0	1	2	3	0	1	1	2	45	0	0	0	0	0	0	0	0	0	#NULL!	1	2091	2091	2091	2091
5859420	19.11.2005	41	0	1	0.65	185	85	143.885	0	0	1	1	1.5	0	0	0	0	1	0	0	1	1	0	0	1	0	1	0	3	0	1	1	1	45	0	0	0	0	0	0	0	0	0	#NULL!	0	2631	2631	2631	2631
5188928	21.01.2003	50	0	1	0.9	180	130	94.935	0	0	1	1	12	0	0	0	0	1	1	0	2	0	0	0	1	0	1	0	3	0	1	1	2	30	0	0	0	0	0	0	0	0	0	#NULL!	0	3664	3664	3664	3664
5427061	13.04.2004	48	0	1	0.9	180	92	95.7249	0	0	1	1	3.5	0	0	0	0	0	0	0	1	1	0	0	1	0	1	2	3	0	1	1	0	45	0	0	0	0	0	0	0	0	0	#NULL!	0	3216	3216	3216	3216
7079133	07.10.2007	60	0	1	1	175	70	81.0118	1	0	1	1	2	0	0	0	0	0	0	0	1	0	0	0	1	0	1	0	3	0	1	1	2	35	0	0	0	0	0	0	0	0	0	#NULL!	0	1944	1944	1944	1944
7187384	12.07.2005	55	0	1	0.85	178	86	99.4649	0	0	3	1	2.5	1	0	0	0	0	0	1	2	1	0	0	1	0	1	0	3	0	1	0	0	55	0	0	0	0	0	0	0	0	0	#NULL!	0	2761	2761	2761	2761
30619033	14.08.2007	51	0	1	0.9	176	92	94.5541	0	0	1	1	0.5	0	0	0	0	0	0	0	2	1	0	0	1	0	1	0	3	0	1	1	2	35	0	0	0	0	0	0	0	0	0	#NULL!	0	1998	1998	1998	1998
5864674	23.01.2007	42	0	1	0.73	174	85	125.233	0	0	1	1	1.5	0	0	0	0	0	0	0	1	1	0	0	1	0	1	0	3	0	1	1	1	45	0	0	0	0	0	0	0	0	0	#NULL!	0	2201	2201	2201	2201
31444939	20.01.2008	66	2	1	1.02	170	78	77.6642	1	0	1	1	1	0	0	0	0	0	0	1	0	1	0	0	1	0	1	2	3	0	1	1	0	55	0	0	0	0	0	0	0	0	0	#NULL!	0	1839	1839	1839	1839
32044748	24.02.2010	33	0	1	0.79	180	94	120.059	0	0	1	1	6	0	0	0	0	1	0	1	1	1	0	0	1	0	1	0	3	0	1	0	2	35	0	0	0	0	0	0	0	0	0	#NULL!	0	1073	1073	1073	1073
5224572	30.03.2009	54	0	1	0.7	165	75	124.909	0	0	1	1	4.5	0	0	0	0	0	1	1	1	0	0	0	1	0	1	0	3	0	1	1	2	35	0	0	0	0	0	0	0	0	0	#NULL!	0	1404	1404	1404	1404
4475134	19.10.2008	69	2	1	0.84	170	70	96.296	0	0	1	1	72	1	0	0	0	0	0	1	0	1	0	0	1	0	1	2	3	0	1	1	2	35	0	0	0	0	0	0	0	0	0	#NULL!	0	1566	1566	1566	1566
6448816	01.11.2008	83	2	2	0.99	154	69	57.1654	2	3	1	1	2.5	0	0	0	0	0	1	1	0	1	0	0	1	0	1	0	3	0	1	0	2	35	0	0	0	0	0	0	0	0	0	#NULL!	0	1553	1553	1553	1553
5567688	02.11.2007	48	0	1	0.88	193	95	98.2399	0	0	1	1	1.5	0	0	0	0	0	0	0	1	1	0	0	1	0	1	0	3	0	1	1	1	45	0	0	0	0	0	0	0	0	0	#NULL!	0	1918	1918	1918	1918
31790035	14.07.2009	53	0	1	1.28	170	70	62.4834	1	0	1	1	4	0	0	0	0	1	0	0	2	0	0	0	1	0	1	3	3	0	1	0	0	55	0	0	0	0	0	0	0	0	0	#NULL!	0	1298	1298	1298	1298
5488301	26.05.2008	50	0	2	1.26	160	73	47.9679	2	3	1	1	3	0	0	0	0	0	1	1	1	0	0	1	2	0	1	0	3	0	1	1	0	55	0	0	0	0	0	0	0	0	0	#NULL!	1	1712	1712	1712	1712
5840068	07.08.2004	41	0	1	0.9	170	97	98.8375	0	0	1	1	13	0	0	0	0	1	0	0	2	1	0	0	1	0	1	1	3	1	1	1	2	35	0	0	0	0	0	0	0	0	0	#NULL!	0	3100	3100	3100	3100
2604675	05.06.2008	59	0	1	1.13	171	90	70.5956	1	0	1	1	1	0	0	0	0	0	0	1	0	1	0	0	1	0	1	0	3	0	1	1	2	35	0	0	0	0	0	0	0	0	0	#NULL!	0	1702	1702	1702	1702
2697863	24.06.2009	58	0	2	0.69	170	70	92.8772	0	0	1	1	3	0	0	0	0	0	1	1	0	1	0	1	1	0	1	2	3	0	1	0	3	25	0	0	0	0	0	0	0	0	0	#NULL!	0	1318	1318	1318	1318
6445117	23.10.2002	70	2	2	1	150	55	58.2589	2	3	1	1	2	0	0	0	0	0	0	1	0	1	1	0	2	0	1	2	3	0	1	1	2	30	0	0	0	0	0	0	0	0	0	#NULL!	1	3754	3754	3754	3754
1090290	11.11.2004	75	2	2	0.51	160	75	124.952	0	0	1	1	3	0	0	0	0	0	0	1	0	0	0	0	2	0	1	2	3	0	1	1	2	30	0	0	0	0	0	0	0	0	0	#NULL!	1	3004	3004	3004	3004
4471567	09.02.2005	58	0	1	0.65	167	90	134.102	0	0	1	1	1.5	0	0	0	0	0	1	1	0	1	0	0	1	0	1	0	3	0	1	1	3	30	0	0	0	0	0	0	0	0	0	#NULL!	0	2914	2914	2914	2914
5345764	29.08.2009	52	0	1	0.73	175	82	119.919	0	0	1	1	10	0	0	0	0	0	0	0	1	1	0	0	1	0	1	0	3	0	1	1	#NULL!	35	0	0	0	0	0	0	0	0	0	#NULL!	0	1252	1252	1252	1252
32068086	03.06.2002	75	2	2	0.9	#NULL!	72	64.8759	1	0	1	1	12	0	0	0	0	0	1	1	0	0	0	0	1	0	1	0	3	0	1	1	3	25	0	0	0	0	0	0	0	0	0	05.01.2006	0	3896	1312	3896	1312
5723385	01.04.2009	46	0	2	0.48	153	70	147.987	0	0	1	1	6	0	0	0	0	0	1	1	0	0	0	0	1	0	1	0	3	0	1	0	1	45	0	0	0	0	0	0	0	0	0	#NULL!	0	1402	1402	1402	1402
5326504	16.10.2010	55	0	1	0.97	180	108	85.4053	1	0	1	1	6	0	0	0	0	0	0	0	0	0	0	0	1	0	1	2	3	0	1	1	0	55	0	0	0	0	0	0	0	0	0	#NULL!	0	839	839	839	839
4146065	09.02.2008	69	2	2	0.55	160	70	116.951	0	0	1	1	5	0	0	0	0	0	1	1	0	1	0	0	1	0	1	2	3	0	1	1	1	45	0	0	0	0	0	0	0	0	0	#NULL!	0	1819	1819	1819	1819
93977082	10.01.2006	38	0	1	0.7	175	80	134.145	0	0	1	1	3	0	0	0	0	1	1	0	2	0	0	0	1	0	1	3	3	0	1	1	3	25	0	0	0	0	0	0	0	0	0	#NULL!	0	2579	2579	2579	2579
5997290	30.07.2003	35	0	1	0.6	170	70	162.96	0	0	1	1	1.5	0	0	0	0	1	0	0	1	0	0	0	1	0	1	0	3	0	1	1	2	30	0	0	0	0	0	0	0	0	0	#NULL!	0	3474	3474	3474	3474
7021291	02.03.2004	70	2	1	1.1	160	87	70.3381	1	0	1	1	1	0	0	0	0	0	0	0	2	1	0	0	1	0	1	2	3	0	1	1	3	25	0	0	0	0	0	0	0	0	0	#NULL!	0	3258	3258	3258	3258
4207123	05.09.2001	69	2	1	0.9	#NULL!	#NULL!	88.9264	1	0	1	1	1.2	0	0	0	0	0	0	0	0	1	0	0	1	0	1	1	3	0	1	1	1	45	0	0	0	0	0	0	0	0	0	#NULL!	0	4167	4167	4167	4167
4769004	11.07.2007	66	2	2	0.84	165	68	72.3908	1	0	1	1	1.5	1	0	0	0	1	1	1	0	1	0	0	1	0	1	3	3	0	1	0	2	35	0	0	0	0	0	0	0	0	0	#NULL!	0	2032	2032	2032	2032
6726346	05.06.2006	53	0	1	0.87	171	74	97.5618	0	0	1	1	3	0	0	0	0	0	0	0	0	1	0	0	1	0	1	0	2	0	0	1	2	42	0	0	0	0	0	0	0	0	0	#NULL!	0	2433	2433	2433	2433
5335268	12.02.2006	50	0	1	0.8	180	85	108.757	0	0	1	1	#NULL!	0	0	0	0	1	0	1	1	0	0	0	1	0	1	0	3	0	1	1	2	35	0	0	0	0	0	0	0	0	0	#NULL!	0	2546	2546	2546	2546
30630092	08.09.2003	39	0	2	1.3	#NULL!	#NULL!	48.4663	2	3	1	1	1.16	0	0	0	0	0	0	1	0	0	0	0	1	0	1	0	3	0	1	0	2	35	0	0	0	0	0	0	0	0	0	#NULL!	0	3434	3434	3434	3434
4197592	18.04.2006	60	0	1	0.97	162	62	83.91	1	0	1	1	2.45	0	0	0	0	0	1	0	1	0	0	0	1	0	1	0	3	0	1	1	3	25	0	0	0	0	0	0	0	0	0	#NULL!	0	2481	2481	2481	2481
7187765	13.11.2002	67	2	2	0.7	156	56	88.7116	1	0	1	1	10	0	0	0	0	0	0	1	0	0	0	0	1	0	1	0	3	0	1	1	2	32	0	0	0	0	0	0	0	0	0	#NULL!	0	3733	3733	3733	3733
1246025	04.12.2005	81	2	1	1.36	165	71	53.4548	2	3	1	1	24	0	0	0	0	0	1	1	0	0	0	0	1	0	1	3	3	0	1	0	0	55	0	0	0	0	0	0	0	0	0	#NULL!	0	2616	2616	2616	2616
7375051	29.11.2001	73	2	1	0.8	#NULL!	#NULL!	100.715	0	0	1	1	7.5	0	0	0	0	0	0	1	0	1	0	0	1	0	1	2	3	0	1	1	3	25	0	0	0	0	0	0	0	0	0	#NULL!	0	4082	4082	4082	4082
389562	12.02.2008	65	0	2	0.82	165	70	74.6632	1	0	1	1	1	1	1	0	0	1	0	1	1	1	0	0	1	0	1	0	3	0	1	0	2	35	0	0	0	0	0	0	0	0	0	#NULL!	0	1816	1816	1816	1816
479454	23.01.2006	61	0	1	0.97	174	80	83.6289	1	0	1	1	1.5	0	0	0	0	0	0	1	0	1	0	0	1	0	1	2	3	0	1	1	1	45	0	0	0	0	0	0	0	0	0	#NULL!	0	2566	2566	2566	2566
31275673	01.01.2008	52	0	1	0.91	180	98	92.9888	0	0	1	1	0	0	0	0	0	0	0	1	1	0	0	0	1	0	1	3	3	0	1	0	0	55	0	0	0	0	0	0	0	0	0	#NULL!	0	1858	1858	1858	1858
4189066	19.03.2009	83	2	2	0.9	165	83	63.5548	1	0	1	1	0.5	0	0	0	0	0	0	1	0	0	0	0	1	0	1	0	3	0	1	0	0	55	0	0	0	0	0	0	0	0	0	#NULL!	0	1415	1415	1415	1415
5744191	19.02.2009	47	0	1	0.67	169	102	135.141	0	0	1	1	2	0	0	0	0	0	0	1	1	0	0	0	1	0	1	3	3	0	1	0	1	45	0	0	0	0	0	0	0	0	0	#NULL!	0	1443	1443	1443	1443
357600	02.05.2003	54	0	1	0.9	182	104	93.4633	0	0	1	1	3.5	0	0	0	0	1	0	1	0	1	0	0	1	0	1	3	3	0	1	1	1	45	0	0	0	0	0	0	0	0	0	#NULL!	0	3563	3563	3563	3563
4947373	23.07.2001	63	0	1	1.2	#NULL!	#NULL!	64.9938	1	0	1	1	0.5	0	0	0	0	0	0	1	0	0	0	0	1	0	1	1	3	0	1	0	2	35	0	0	0	0	0	0	0	0	0	#NULL!	0	4211	4211	4211	4211
374157	03.10.2004	72	2	1	0.6	170	73	140.763	0	0	1	1	#NULL!	0	0	0	0	1	1	1	0	0	0	0	2	0	1	2	3	0	1	1	1	42	0	0	0	0	0	0	0	0	0	#NULL!	1	3043	3043	3043	3043
31163419	15.10.2004	77	2	1	0.9	170	75	86.968	1	0	1	1	4	1	0	0	0	0	0	1	0	1	0	0	3	2	1	3	3	0	1	1	0	50	0	0	0	0	0	0	0	0	0	#NULL!	1	3031	3031	3031	3031
32137019	24.02.2005	59	0	1	1.82	160	60	40.7294	2	3	1	1	2.5	0	0	0	0	0	0	1	1	0	0	0	1	0	1	0	3	0	1	1	3	25	0	0	0	0	0	0	0	0	0	#NULL!	0	2899	2899	2899	2899
5006792	15.11.2009	59	0	1	1.17	180	91	67.8178	1	0	1	1	7	0	0	0	0	1	0	0	0	1	0	0	1	0	1	0	3	0	1	1	2	35	0	0	0	0	0	0	0	0	0	#NULL!	0	1174	1174	1174	1174
32082693	11.09.2008	58	0	2	1	163	106	60.7706	1	0	3	1	1	1	1	0	0	0	1	1	0	1	0	0	1	0	1	0	3	0	1	1	0	55	0	0	0	0	0	0	0	0	0	#NULL!	0	1604	1604	1604	1604
32339979	10.02.2008	56	0	1	0.9	165	85	92.7758	0	0	1	1	4	0	0	0	0	0	0	0	1	0	0	0	2	0	1	0	3	0	1	1	3	25	0	0	0	0	0	0	0	0	0	#NULL!	1	1818	1818	1818	1818
3526407	29.03.2010	59	0	1	0.72	170	105	118.759	0	0	1	1	2	0	0	0	0	0	0	0	0	1	0	0	1	0	1	2	3	0	1	1	0	55	0	0	0	0	0	0	0	0	0	#NULL!	0	1040	1040	1040	1040
3540382	11.02.2005	65	0	1	0.92	#NULL!	#NULL!	87.7567	1	0	1	1	2	0	0	0	0	0	0	0	1	0	0	0	1	0	1	3	3	0	1	1	1	45	0	0	0	0	0	0	0	0	0	#NULL!	0	2912	2912	2912	2912
5578641	17.10.2004	45	0	1	0.9	175	80	96.9873	0	0	1	1	2	0	0	0	0	1	0	1	1	0	0	0	1	0	1	0	3	0	1	1	2	30	0	0	0	0	0	0	0	0	0	#NULL!	0	3029	3029	3029	3029
5816956	01.12.2004	41	0	1	0.71	173	110	129.947	0	0	1	1	1	0	0	0	0	0	1	1	1	0	0	0	1	0	1	2	3	0	1	1	2	35	0	0	0	0	0	0	0	0	0	#NULL!	0	2984	2984	2984	2984
3539297	19.11.2008	68	2	1	0.76	175	95	108.406	0	0	1	1	2	1	0	0	0	1	0	1	2	0	0	0	1	0	1	0	3	0	1	0	1	45	0	0	0	0	0	0	0	0	0	#NULL!	0	1535	1535	1535	1535
3030624	02.12.2003	68	2	2	0.65	#NULL!	64	96.342	0	0	1	1	1	0	0	0	0	0	0	1	0	1	0	0	1	0	1	0	3	0	1	1	2	35	0	0	0	0	0	0	0	0	0	#NULL!	0	3349	3349	3349	3349
2291544	05.02.2003	35	0	1	0.92	168	61	99.5075	0	0	1	1	3	0	0	0	0	0	0	0	1	0	0	0	1	0	1	0	3	0	1	1	1	35	0	0	0	0	0	0	0	0	0	#NULL!	0	3649	3649	3649	3649
5437266	12.09.2004	48	0	1	0.9	174	78	95.7249	0	0	1	1	2	0	0	0	0	1	0	0	0	0	0	0	1	0	1	2	3	0	1	1	2	30	0	0	0	0	0	0	0	0	0	#NULL!	0	3064	3064	3064	3064
5812423	27.08.2006	43	0	1	0.88	174	64	100.458	0	0	1	1	2	0	0	0	0	1	0	0	1	0	0	0	1	0	1	0	3	0	1	0	1	45	0	0	0	0	0	0	0	0	0	#NULL!	0	2350	2350	2350	2350
7011363	11.12.2003	63	0	1	1	#NULL!	90	80.2134	1	0	1	1	2.8	0	0	0	0	0	1	0	2	1	0	0	1	0	1	2	3	0	1	1	2	35	0	0	0	0	0	0	0	0	0	#NULL!	0	3340	3340	3340	3340
5599477	04.10.2006	46	0	1	0.8	170	80	110.613	0	0	3	1	4	0	0	0	0	1	0	0	1	0	0	0	1	0	1	3	3	0	1	0	0	55	0	0	0	0	0	0	0	0	0	#NULL!	0	2312	2312	2312	2312
5378511	26.03.2006	50	0	1	0.73	178	83	120.878	0	0	1	1	2	0	0	0	0	0	0	0	1	0	0	0	1	0	1	0	3	0	1	1	1	45	0	0	0	0	0	0	0	0	0	#NULL!	0	2504	2504	2504	2504
5102832	12.02.2007	55	0	1	0.91	176	85	91.936	0	0	1	1	3	0	0	0	0	0	0	0	1	0	0	0	2	0	1	3	3	1	1	1	#NULL!	#NULL!	0	0	0	0	0	0	0	0	0	#NULL!	1	2181	2181	2181	2181
4291005	09.06.2010	65	0	1	1.09	168	70	72.1608	1	0	1	1	8	0	0	0	0	0	1	0	0	1	0	0	1	0	1	2	3	0	1	1	2	35	0	0	0	0	0	0	0	0	0	#NULL!	0	968	968	968	968
2356394	08.11.2004	36	0	1	0.7	176	92	135.625	0	0	1	1	0.5	0	0	0	0	1	0	0	1	0	0	0	1	0	1	3	3	0	1	1	1	45	0	0	0	0	0	0	0	0	0	#NULL!	0	3007	3007	3007	3007
4147939	28.07.2005	66	2	1	0.83	160	75	98.5211	0	0	1	1	1.5	0	0	0	0	0	1	1	0	1	0	0	1	0	1	0	3	0	1	1	1	45	0	0	0	0	0	0	0	0	0	#NULL!	0	2745	2745	2745	2745
411908	12.01.2006	60	0	1	0.72	170	62	118.355	0	0	1	1	5	0	0	0	0	1	1	1	0	1	0	0	2	0	1	0	3	0	1	1	1	45	0	0	0	0	0	0	0	0	0	#NULL!	1	2577	2577	2577	2577
5421907	09.09.2008	51	0	1	0.88	183	140	97.0383	0	0	1	1	1.5	0	0	0	0	1	1	1	1	1	0	0	1	0	1	3	3	0	1	1	2	35	0	0	0	0	0	0	0	0	0	#NULL!	0	1606	1606	1606	1606
2528040	28.04.2005	31	0	1	1.06	170	80	86.6091	1	0	1	1	0.5	0	0	0	0	1	0	0	1	0	0	0	1	0	1	3	3	0	1	1	2	35	0	0	0	0	0	0	0	0	0	#NULL!	0	2836	2836	2836	2836
5299559	20.12.2005	24	0	2	0.37	165	80	228.05	0	0	1	1	#NULL!	1	0	0	0	0	0	0	0	0	0	0	1	0	1	3	3	0	1	0	2	35	0	0	0	0	0	0	0	0	0	#NULL!	0	2600	2600	2600	2600
7717801	07.09.2002	66	2	2	1	165	97	58.9589	2	3	1	1	6	0	0	0	0	0	1	0	0	0	0	0	1	0	1	0	3	0	1	1	1	42	0	0	0	0	0	0	0	0	0	#NULL!	0	3800	3800	3800	3800
4353101	23.03.2006	61	0	1	1.41	170	92	54.3115	2	3	1	1	2	0	0	0	0	0	0	1	0	0	0	0	1	0	1	0	3	1	1	0	1	45	0	0	0	0	0	0	0	0	0	#NULL!	0	2507	2507	2507	2507
369368	02.11.2004	87	2	1	1.08	165	65	68.7416	1	0	1	1	1	0	0	0	0	0	0	0	0	0	0	1	3	2	1	0	3	1	1	1	3	25	0	0	0	0	0	0	0	0	0	25.01.2008	1	3013	1179	3013	1179
6941632	08.07.2003	56	0	1	1.2	176	76	66.5665	1	0	1	1	2	0	0	0	0	1	0	0	0	1	0	0	1	0	1	3	3	0	1	1	2	35	0	0	0	0	0	0	0	0	0	#NULL!	0	3496	3496	3496	1442
32097257	17.06.2002	66	2	1	0.7	165	70	119.923	0	0	3	1	2	0	0	0	0	1	1	1	0	1	0	0	1	0	1	0	3	0	1	0	0	55	0	0	0	0	0	0	0	0	0	17.02.2006	0	3882	1341	3882	1341
5550635	16.04.2008	49	0	1	0.92	173	68	92.9377	0	0	1	1	2.5	0	0	0	0	0	0	0	0	0	0	0	1	0	1	0	3	0	1	1	2	35	0	0	0	0	0	0	0	0	0	#NULL!	0	1752	1752	1752	1752
6557630	26.06.2006	48	0	1	1.01	170	73	83.7981	1	0	1	1	#NULL!	0	0	0	0	1	0	0	1	0	0	0	1	0	1	0	0	0	0	1	1	45	0	0	0	0	0	0	0	0	0	#NULL!	0	2412	2412	2412	2412
256757	20.08.2005	74	2	1	1.07	173	87	71.8042	1	0	1	1	1	1	1	0	0	0	0	1	0	1	0	0	2	0	1	3	3	0	1	1	2	35	0	0	0	0	0	0	0	0	0	#NULL!	1	2722	2722	2722	2722
5025328	10.12.2003	53	0	1	0.8	173	91	107.478	0	0	1	1	4	0	0	0	0	1	0	1	0	0	0	0	2	0	1	0	3	0	1	1	2	35	0	0	0	0	0	0	0	0	0	#NULL!	1	3341	3341	3341	3341
267597	27.07.2005	74	2	2	0.93	155	55	62.6374	1	0	1	1	3	0	0	0	0	0	0	0	0	1	0	0	2	0	1	2	3	0	1	1	3	25	0	0	0	0	0	0	0	0	0	#NULL!	1	2746	2746	2746	2746
3037323	09.04.2007	57	0	1	0.84	182	90	100.104	0	0	1	1	1.5	0	0	0	0	0	1	1	1	0	0	0	1	0	1	2	3	0	1	1	0	55	0	0	0	0	0	0	0	0	0	#NULL!	0	2125	2125	2125	2125
1052902	29.06.2003	53	0	2	0.77	165	83	83.3448	1	0	1	1	2	0	0	0	0	0	1	0	1	0	0	0	1	0	1	0	3	0	1	1	0	50	0	0	0	0	0	0	0	0	0	#NULL!	0	3505	3505	3505	3505
1424632	27.11.2002	37	0	1	0.8	180	90	115.612	0	0	3	1	1	0	0	0	0	0	0	0	1	1	0	0	1	0	1	0	3	0	1	1	1	50	0	0	0	0	0	0	0	0	0	#NULL!	0	3719	3719	3719	3719
5910482	26.01.2009	44	0	1	0.8	165	69	111.616	0	0	1	1	2	0	0	0	0	1	0	0	0	0	0	0	1	0	1	0	3	0	1	0	2	35	0	0	0	0	0	0	0	0	0	#NULL!	0	1467	1467	1467	1467
6444231	17.12.2002	49	0	1	0.9	174	85	95.3251	0	0	1	1	1	0	0	0	0	1	0	0	1	1	0	1	1	0	1	3	3	0	1	0	2	30	0	0	0	0	0	0	0	0	0	#NULL!	0	3699	3699	3699	3699
595686	26.04.2005	58	0	1	1.13	175	90	70.841	1	0	1	1	2	0	0	0	0	0	0	0	1	0	0	0	1	0	1	0	2	0	0	1	2	35	0	0	0	0	0	0	0	0	0	#NULL!	0	2838	2838	2838	2838
3039539	23.03.2006	57	0	1	0.75	173	106	114.091	0	0	1	1	2	0	0	0	0	0	0	0	0	1	0	0	2	0	1	2	3	1	1	1	2	35	0	0	0	0	0	0	0	0	0	#NULL!	1	2507	2507	2507	2507
340164	24.02.2003	59	0	1	0.8	173	80	105.163	0	0	1	1	1.5	0	0	0	0	0	0	0	2	0	0	0	1	0	1	0	3	0	1	1	2	35	0	0	0	0	0	0	0	0	0	#NULL!	0	3630	3630	3630	3630
899492	20.10.2006	69	2	1	1.2	168	70	63.8045	1	0	1	1	1	1	1	0	0	0	0	0	2	1	0	0	2	0	1	2	3	0	1	1	1	45	0	0	0	0	0	0	0	0	0	#NULL!	1	2296	2296	2296	2296
5400845	07.02.2010	54	0	2	0.8	160	60	79.4466	1	0	1	1	2	1	1	0	0	1	0	0	0	1	0	0	1	0	1	0	3	0	1	0	0	55	0	0	0	0	0	0	0	0	0	#NULL!	0	1090	1090	1090	1090
5484096	25.10.2007	50	0	1	0.76	165	92	115.389	0	0	1	1	4	0	0	0	0	1	0	0	1	0	0	0	1	0	1	1	3	0	1	1	1	45	0	0	0	0	0	0	0	0	0	#NULL!	0	1926	1926	1926	1926
5292111	07.02.2006	51	0	1	0.87	174	73	98.3266	0	0	1	1	2	0	0	0	0	1	1	1	0	0	0	0	1	0	1	3	3	0	1	1	2	35	0	0	0	0	0	0	0	0	0	#NULL!	0	2551	2551	2551	2551
5741701	20.02.2007	45	0	1	1.14	183	115	73.8317	1	0	1	1	2	0	0	0	0	1	0	1	0	0	0	0	1	0	1	2	2	0	0	1	1	45	0	0	0	0	0	0	0	0	0	#NULL!	0	2173	2173	2173	2173
30733034	19.07.2009	60	0	1	0.92	176	80	89.1943	1	0	1	1	1	0	0	0	0	0	0	1	1	0	0	0	1	0	1	0	2	1	0	1	3	25	0	0	0	0	0	0	0	0	0	#NULL!	0	1293	1293	1293	1293
6539536	12.11.2004	63	0	1	0.97	170	73	83.083	1	0	1	1	12	0	0	0	0	1	0	0	0	1	0	0	2	0	1	2	3	0	1	1	1	45	0	0	0	0	0	0	0	0	0	#NULL!	1	3003	3003	3003	3003
30425528	05.09.2006	61	0	2	0.71	164	100	88.9493	1	0	1	1	4	0	0	0	0	0	1	1	1	0	0	0	1	0	1	2	3	0	1	1	0	55	0	0	0	0	0	0	0	0	0	#NULL!	0	2341	2341	2341	2341
5291708	24.01.2007	52	0	1	0.92	170	74	91.8233	0	0	1	1	1	0	0	0	0	0	0	0	1	0	0	0	1	0	1	0	3	0	1	0	0	55	0	0	0	0	0	0	0	0	0	#NULL!	0	2200	2200	2200	2200
3398457	08.09.2002	25	0	2	1	162	57	71.8017	1	0	1	1	3.5	0	0	0	0	0	0	0	1	0	0	0	1	0	1	1	3	0	1	1	2	35	0	0	0	0	0	0	0	0	0	#NULL!	0	3799	3799	3799	3799
149555	20.06.2004	75	2	1	0.9	155	55	87.4339	1	0	1	1	5	0	0	0	0	0	0	0	0	0	0	0	3	2	1	0	3	1	1	1	2	35	0	0	0	0	0	0	0	0	0	#NULL!	1	3148	3148	3148	3148
6549499	20.08.2003	62	0	1	1	167	67	80.4743	1	0	1	1	1	0	0	0	0	0	0	1	0	0	0	0	2	0	1	0	3	0	1	1	1	45	0	0	0	0	0	0	0	0	0	#NULL!	1	3453	3453	3453	3453
143225	15.07.2001	53	0	1	1	#NULL!	#NULL!	83.0778	1	0	1	1	1.75	0	0	0	0	0	1	0	0	1	0	0	1	0	1	0	3	0	1	1	2	30	0	0	0	0	0	0	0	0	0	#NULL!	0	4219	4219	4219	4219
5174947	12.07.2003	50	0	1	1.2	180	100	68.1156	1	0	1	1	4.5	0	0	0	0	0	1	0	1	1	0	0	1	0	1	3	3	0	1	1	2	35	0	0	0	0	0	0	0	0	0	#NULL!	0	3492	3492	3492	3492
6896767	14.08.2009	50	0	1	0.67	180	120	133.454	0	0	1	1	1	0	0	0	0	0	0	1	1	1	0	0	1	0	1	0	3	0	1	1	1	45	0	0	0	0	0	0	0	0	0	#NULL!	0	1267	1267	1267	1267
30693309	13.09.2009	61	0	2	0.69	160	60	91.9312	0	0	1	1	0.5	0	0	0	0	0	0	0	1	0	0	0	1	0	1	1	3	0	1	1	2	35	0	0	0	0	0	0	0	0	0	#NULL!	0	1237	1237	1237	1237
5195614	18.08.2009	56	0	1	0.71	183	95	121.977	0	0	1	1	3	0	0	0	0	0	0	1	0	1	0	0	1	0	1	0	3	0	1	0	2	35	0	0	0	0	0	0	0	0	0	#NULL!	0	1263	1263	1263	1263
32218497	05.08.2008	46	0	1	0.8	184	100	110.613	0	0	1	1	1	0	0	0	0	0	0	0	1	1	0	0	2	0	1	3	3	0	1	0	2	35	0	0	0	0	0	0	0	0	0	#NULL!	1	1641	1641	1641	1641
30646552	16.09.2001	57	0	2	1.1	#NULL!	#NULL!	54.4136	2	3	1	1	5.3	0	0	0	0	1	1	1	1	1	0	0	1	0	1	0	3	0	1	0	1	45	0	0	0	0	0	0	0	0	0	#NULL!	0	4156	4156	4156	4156
4154374	16.02.2009	62	0	1	0.69	163	60	123.488	0	0	1	1	1.5	0	0	0	0	0	0	1	1	0	0	0	1	0	1	3	3	0	1	1	2	35	0	0	0	0	0	0	0	0	0	#NULL!	0	1446	1446	1446	1446
141476	22.07.2005	85	2	2	1	165	80	56.0073	2	3	1	1	#NULL!	0	0	0	0	0	1	1	0	1	0	0	1	0	1	0	3	0	1	0	2	35	0	0	0	0	0	0	0	0	0	#NULL!	0	2751	2751	2751	2751
4135565	30.10.2006	65	0	2	0.71	158	64	87.8099	1	0	1	1	4	0	0	0	0	0	0	1	0	1	0	0	2	0	1	2	3	0	1	1	2	35	0	0	0	0	0	0	0	0	0	#NULL!	1	2286	2286	2286	2286
30624496	23.11.2003	64	0	1	0.9	168	64	90.2948	0	0	1	1	3	0	0	0	0	0	0	0	0	0	0	0	1	0	1	1	3	0	1	1	2	35	0	0	0	0	0	0	0	0	0	#NULL!	0	3358	3358	3358	3358
118057	24.03.2007	62	0	1	1.04	172	100	76.9132	1	0	1	1	#NULL!	0	0	0	0	0	0	1	0	1	0	0	1	0	1	3	3	0	1	1	0	55	0	0	0	0	0	0	0	0	0	#NULL!	0	2141	2141	2141	2141
6909106	12.05.2005	57	0	1	0.82	166	72	102.927	0	0	1	1	1.5	0	0	0	0	0	0	0	1	0	0	0	1	0	1	3	3	0	1	1	0	55	0	0	0	0	0	0	0	0	0	#NULL!	0	2822	2822	2822	2822
1746588	05.01.2008	54	0	2	0.71	160	67	91.5464	0	0	1	1	1	0	0	0	0	0	0	0	1	1	0	0	1	0	1	3	3	0	1	0	1	45	0	0	0	0	0	0	0	0	0	#NULL!	0	1854	1854	1854	1854
567443	12.01.2006	56	0	1	0.62	170	82	142.63	0	0	1	1	2	0	0	0	0	0	1	0	1	1	0	0	3	2	1	0	3	0	1	1	2	35	0	0	0	0	0	0	0	0	0	#NULL!	1	2577	2577	2577	2577
8100220042	12.01.2007	64	0	2	0.8	170	75	76.7532	1	0	1	1	2.5	0	0	0	0	0	0	1	0	0	0	0	1	0	1	0	3	0	1	1	2	35	0	0	0	0	0	0	0	0	0	#NULL!	0	2212	2212	2212	2212
777115	15.12.2006	61	0	1	1.2	175	85	65.4208	1	0	1	1	12	0	0	0	0	0	0	1	0	1	0	0	1	0	1	0	3	0	1	1	3	25	0	0	0	0	0	0	0	0	0	#NULL!	0	2240	2240	2240	2240
4201866	19.08.2006	63	0	1	0.98	170	72	82.1054	1	0	1	1	2	0	0	0	0	1	0	1	0	1	0	0	1	0	1	0	3	0	1	1	2	35	0	0	0	0	0	0	0	0	0	#NULL!	0	2358	2358	2358	2358
238528	16.08.2003	77	2	1	0.9	170	80	86.968	1	0	1	1	2	0	0	0	0	0	0	0	0	0	0	0	1	0	1	2	3	0	1	1	0	50	0	0	0	0	0	0	0	0	0	#NULL!	0	3457	3457	3457	3457
6714637	20.08.2006	49	0	1	0.98	188	86	86.4029	1	0	1	1	0.5	0	0	0	0	0	0	1	2	0	0	0	1	0	1	0	3	0	1	0	2	35	0	0	0	0	0	0	0	0	0	#NULL!	0	2357	2357	2357	2357
5437626	17.01.2010	53	0	1	0.83	175	85	103.007	0	0	1	1	0.5	0	0	0	0	0	0	0	0	1	0	0	1	0	1	3	3	0	1	0	1	45	0	0	0	0	0	0	0	0	0	#NULL!	0	1111	1111	1111	1111
702921	03.08.2004	60	0	1	1.1	175	100	72.574	1	0	1	1	2	0	1	0	0	0	0	1	0	0	0	0	1	0	1	0	3	0	1	1	2	30	0	0	0	0	0	0	0	0	0	#NULL!	0	3104	3104	3104	3104
30399011	16.01.2006	42	0	1	0.97	166	67	90.2108	0	0	1	1	1	0	0	0	0	1	0	0	0	1	0	0	1	0	1	0	3	0	1	1	3	25	0	0	0	0	0	0	0	0	0	#NULL!	0	2573	2573	2573	2573
869124	29.04.2003	66	2	1	1.2	172	76	64.3829	1	0	1	1	16	0	0	0	0	0	0	0	1	0	0	0	1	0	1	1	1	#NULL!	0	0	2	30	0	0	0	0	0	0	0	0	0	#NULL!	0	3566	3566	3566	3566
31753021	13.07.2007	53	0	1	0.62	168	73	144.233	0	0	1	1	1	0	0	0	0	0	0	0	1	0	0	0	1	0	1	3	3	0	1	1	1	45	0	0	0	0	0	0	0	0	0	#NULL!	0	2030	2030	2030	2030
31172863	12.04.2005	41	0	1	0.86	160	75	104.161	0	0	1	1	2	0	0	0	0	0	0	0	1	0	0	0	1	0	1	0	3	0	1	1	1	45	0	0	0	0	0	0	0	0	0	#NULL!	0	2852	2852	2852	2852
446574	19.11.2007	66	2	1	0.65	156	55	130.63	0	0	1	1	15	0	0	0	0	0	0	1	0	0	0	0	1	0	1	1	3	0	1	1	3	25	0	0	0	0	0	0	0	0	0	#NULL!	0	1901	1901	1901	1901
5128177	01.10.2004	52	0	1	1.3	164	72	61.6132	1	0	1	1	1.5	0	0	0	0	0	0	0	1	1	0	0	1	0	1	0	3	0	1	1	2	30	0	0	0	0	0	0	0	0	0	#NULL!	0	3045	3045	3045	3045
8705337170	16.08.2008	67	2	1	0.9	160	80	89.459	1	0	1	1	1.5	0	0	0	0	0	0	0	0	0	0	0	1	0	1	2	3	0	1	1	2	35	0	0	0	0	0	0	0	0	0	#NULL!	0	1630	1630	1630	1630
1085220	08.02.2007	83	2	1	0.87	173	83	89.0707	1	0	1	1	3	1	1	0	0	0	0	1	0	1	0	0	3	2	1	0	3	0	1	0	0	55	0	0	0	0	0	0	0	0	0	#NULL!	1	2185	2185	2185	2185
781962	22.07.2007	59	0	1	1.2	188	100	65.865	1	0	1	1	1	0	0	0	0	1	0	1	2	1	0	0	1	0	1	0	3	0	1	1	1	45	0	0	0	0	0	0	0	0	0	#NULL!	0	2021	2021	2021	2021
2368127	07.06.2006	38	0	1	1.33	178	80	63.9576	1	0	1	1	1	0	0	0	0	1	0	0	0	0	0	0	1	0	1	0	3	0	1	1	2	35	0	0	0	0	0	0	0	0	0	#NULL!	0	2431	2431	2431	2431
2359859	25.11.2007	39	0	1	1.03	175	77	85.4501	1	0	1	1	0.5	0	0	0	0	1	0	0	2	0	0	0	1	0	1	0	3	0	1	1	0	55	0	0	0	0	0	0	0	0	0	#NULL!	0	1895	1895	1895	1895
5591185	15.08.2005	49	0	1	0.74	160	60	119.484	0	0	1	1	5	0	0	0	0	0	0	0	1	0	0	0	1	0	1	0	0	#NULL!	0	1	2	35	0	0	0	0	0	0	0	0	0	#NULL!	0	2727	2727	2727	2727
5031585	22.08.2010	59	0	1	0.9	170	75	91.7982	0	0	1	1	2.5	1	0	0	0	0	1	1	0	1	0	0	1	0	1	0	3	0	1	1	2	35	0	0	0	0	0	0	0	0	0	#NULL!	0	894	894	894	894
5121345	20.10.2004	52	0	1	1.1	167	67	74.7132	1	0	1	1	8	0	0	0	0	0	1	0	1	0	0	0	1	0	1	2	3	0	1	1	2	30	0	0	0	0	0	0	0	0	0	#NULL!	0	3026	3026	3026	3026
31778722	10.05.2009	51	0	1	0.8	180	94	108.32	0	0	1	1	60	0	0	0	0	0	1	0	1	1	0	0	1	0	1	0	3	0	1	0	0	55	0	0	0	0	0	0	0	0	0	#NULL!	0	1363	1363	1363	1363
6443535	30.11.2005	52	0	1	1.1	180	80	74.7132	1	0	1	1	2.5	0	0	0	0	1	0	0	1	0	0	0	1	0	1	3	3	0	1	0	2	35	0	0	0	0	0	0	0	0	0	#NULL!	0	2620	2620	2452	2452
5059015	13.03.2008	57	0	1	1.28	175	100	61.5673	1	0	1	1	0.5	0	0	0	0	0	0	0	0	0	0	0	2	0	1	0	3	0	1	1	2	35	0	0	0	0	0	0	0	0	0	#NULL!	1	1786	1786	1786	1786
463162	16.03.2007	63	0	1	1.27	160	54	60.8776	1	0	1	1	4	0	0	0	0	0	0	0	1	1	0	0	1	0	1	3	3	1	1	1	3	25	0	0	0	0	0	0	0	0	0	#NULL!	0	2149	2149	2149	2149
4147440	01.04.2006	82	2	1	0.78	167	67	101.282	0	0	1	1	3	0	0	0	0	0	0	1	0	0	0	0	1	0	1	0	3	0	1	0	1	45	0	0	0	0	0	0	0	0	0	#NULL!	0	2498	2498	2498	2498
5180176	25.07.2009	56	0	1	0.79	165	64	107.837	0	0	1	1	0.5	0	0	0	0	1	0	0	1	0	0	0	1	0	1	3	3	0	1	0	0	55	0	0	0	0	0	0	0	0	0	#NULL!	0	1287	1287	1182	1182
5259910	15.02.2006	51	0	2	0.53	165	110	129.26	0	0	1	1	2	0	0	0	0	1	1	0	0	1	0	0	1	0	1	0	3	0	1	1	1	45	0	0	0	0	0	0	0	0	0	#NULL!	0	2543	2543	2543	2543
1188984	20.03.2007	54	0	1	0.99	176	95	83.7286	1	0	1	1	1	0	0	0	0	0	0	0	1	0	0	0	1	0	1	3	3	0	1	0	#NULL!	#NULL!	0	0	0	0	0	0	0	0	0	#NULL!	0	2145	2145	2145	2145
4156006	10.07.2008	84	2	1	0.72	165	68	110.541	0	0	1	1	3	0	0	0	0	0	0	1	1	1	0	0	1	0	1	0	3	0	1	1	3	25	0	0	0	0	0	0	0	0	0	#NULL!	0	1667	1667	1667	1667
5593829	07.04.2004	44	0	1	0.6	177	80	155.563	0	0	1	1	2	0	0	0	0	1	0	0	1	1	0	0	1	0	1	0	3	0	1	1	1	45	0	0	0	0	0	0	0	0	0	#NULL!	0	3222	3222	3222	3222
4682841	27.10.2002	70	2	2	0.8	150	64	75.3696	1	0	1	1	2	0	0	0	0	0	0	1	0	1	0	0	1	0	1	0	3	0	1	1	2	35	0	0	0	0	0	0	0	0	0	#NULL!	0	3750	3750	3750	3750
939953	02.04.2008	58	0	1	0.78	174	65	108.658	0	0	1	1	1	0	0	0	0	1	1	1	0	1	0	0	1	0	1	0	3	0	1	1	0	55	0	0	0	0	0	0	0	0	0	#NULL!	0	1766	1766	1766	1766
5022022	13.02.2006	55	0	1	0.98	160	60	84.4004	1	0	1	1	1	0	0	0	0	1	0	0	0	0	0	0	1	0	1	0	3	0	1	1	3	25	0	0	0	0	0	0	0	0	0	#NULL!	0	2545	2545	2545	2545
163774	22.07.2008	63	0	1	1.04	180	100	76.6638	1	0	3	1	1	0	0	0	0	0	0	0	0	1	0	0	1	0	1	2	3	0	1	0	0	55	0	0	0	0	0	0	0	0	0	#NULL!	0	1655	1655	1655	1655
5015119	24.08.2009	56	0	1	0.7	175	80	123.99	0	0	2	1	6	0	0	0	0	1	1	0	1	0	0	0	1	0	1	3	3	0	1	0	0	55	0	0	0	0	0	0	0	0	0	#NULL!	0	1257	1257	1257	1257
666064	10.05.2009	77	2	1	0.89	163	55	88.0966	1	0	1	1	1	1	1	0	0	1	0	1	0	1	1	0	1	0	1	0	3	0	1	0	2	35	0	0	0	0	0	0	0	0	0	#NULL!	0	1363	1363	1363	1363
4149028	02.11.2001	70	2	1	1.1	#NULL!	#NULL!	70.3381	1	0	1	1	2.3	0	0	0	0	0	0	1	0	0	0	0	1	0	1	0	3	0	1	1	0	45	0	0	0	0	0	0	0	0	0	#NULL!	0	4109	4109	4109	4109
7573695	17.12.2009	62	0	1	1.02	165	62	78.6562	1	0	1	1	2	1	0	0	0	0	1	1	1	1	0	1	1	0	1	3	3	0	1	1	0	55	0	0	0	0	0	0	0	0	0	#NULL!	0	1142	1142	1142	1142
6953305	21.10.2005	60	0	1	0.89	170	62	92.6728	0	0	1	1	1	0	0	0	0	1	0	0	1	0	0	0	2	0	1	2	3	0	1	1	2	35	0	0	0	0	0	0	0	0	0	#NULL!	1	2660	2660	2660	2660
5367900	11.02.2002	47	0	1	1.05	170	80	80.4683	1	0	2	1	1.5	0	0	0	0	0	0	0	0	1	0	0	1	0	3	0	3	0	1	1	0	55	0	1	1	0	1	1	0	1	1	#NULL!	0	4008	4008	74	74
327710	13.02.2004	76	2	2	0.8	#NULL!	#NULL!	74.1218	1	0	2	1	2	1	1	0	0	1	1	1	0	1	0	0	3	2	3	0	3	0	1	1	0	50	0	0	1	0	0	1	0	0	1	#NULL!	1	3276	3276	3276	56
5939263	04.05.2002	37	0	2	0.7	#NULL!	#NULL!	100.076	0	0	2	1	1.5	0	0	0	0	0	0	0	0	0	0	0	1	0	3	3	3	0	1	0	0	45	0	1	1	0	1	1	0	1	1	#NULL!	0	3926	3926	303	303
1310122	18.05.2007	47	0	1	1.02	174	90	83.2056	1	0	2	1	1	1	1	0	0	1	0	1	2	1	0	0	1	0	3	0	3	0	1	0	1	45	0	0	1	0	0	1	0	0	1	#NULL!	0	2086	2086	2086	95
5112668	21.08.2001	49	0	1	1.5	#NULL!	#NULL!	52.8681	2	3	2	1	2.5	0	0	0	0	0	1	1	1	1	0	0	1	0	3	0	3	0	1	1	0	45	0	1	1	0	1	1	0	1	1	#NULL!	0	4182	4182	41	41
7260015	16.09.2003	54	0	1	0.9	160	68	93.4633	0	0	2	1	6	0	0	0	0	0	0	0	2	1	0	0	1	0	3	0	3	0	1	1	1	45	0	0	1	0	0	1	0	0	1	#NULL!	0	3426	3426	3426	54
7542354	11.08.2005	58	0	1	0.87	184	110	95.7926	0	0	2	1	9	0	0	0	0	0	1	1	0	1	0	0	3	2	3	0	3	0	1	1	0	55	0	0	1	0	0	1	0	0	1	#NULL!	1	2731	2731	2731	51
5201330	10.08.2001	48	0	1	1.4	#NULL!	#NULL!	57.4896	2	3	2	1	1	0	0	0	0	0	0	0	0	1	0	0	1	0	3	0	3	0	1	1	1	45	0	1	1	0	1	1	0	1	1	#NULL!	0	4193	4193	72	72
5288396	17.02.2005	50	0	1	0.61	168	50	148.714	0	0	2	1	2	0	0	0	0	0	1	0	1	1	0	1	3	2	3	0	3	0	1	#NULL!	0	55	0	0	1	0	0	1	0	0	1	#NULL!	1	2906	2906	1690	38
5560677	02.06.2005	48	0	1	0.85	155	57	102.252	0	0	2	1	1	0	0	0	0	0	0	0	1	1	0	0	1	0	3	3	3	0	1	0	0	55	0	0	1	0	0	1	0	1	1	#NULL!	0	2801	2801	1104	122
2295000	10.12.2008	42	0	1	0.66	175	75	140.682	0	0	2	1	0.5	0	0	0	0	0	0	0	1	0	0	0	1	0	2	1	3	0	1	1	0	55	0	0	1	0	0	1	0	0	1	#NULL!	0	1514	1514	1514	124
5473915	09.07.2009	52	0	1	0.79	165	67	109.472	0	0	2	1	1	0	0	0	0	0	0	0	2	1	0	0	1	0	2	3	3	0	1	0	2	35	0	1	1	0	1	1	0	1	1	#NULL!	0	1303	1303	89	89
5093760	03.02.2007	55	0	2	0.55	160	72	121.968	0	0	3	1	2	0	0	0	0	1	1	1	1	1	0	0	2	0	2	1	1	0	0	1	1	45	0	1	1	0	1	1	0	1	1	#NULL!	1	2190	2190	197	197
3540909	22.09.2000	52	0	1	#NULL!	#NULL!	#NULL!	#NULL!	#NULL!	#NULL!	1	1	#NULL!	0	0	0	0	0	1	1	1	0	0	0	1	0	1	3	3	#NULL!	1	1	2	35	0	0	1	0	0	1	0	0	1	#NULL!	0	4515	4515	4515	173
498865	27.05.2001	73	2	1	0.9	#NULL!	#NULL!	87.9149	1	0	1	1	2.5	0	0	0	0	0	0	1	0	1	0	0	1	0	1	3	3	#NULL!	1	1	#NULL!	#NULL!	0	0	1	0	0	1	0	0	1	#NULL!	0	4268	4268	4268	344
2315034	26.09.2002	48	0	1	0.8	167	115	109.662	0	0	1	1	3	0	0	0	0	0	1	1	1	0	1	0	1	0	1	0	3	0	1	0	2	30	0	1	1	0	1	1	0	1	1	#NULL!	0	3781	3781	65	65
65280	31.07.2002	80	2	1	1	165	65	76.4162	1	0	1	1	1	0	0	0	0	0	1	0	0	0	0	0	1	0	1	3	3	0	1	1	0	50	0	0	1	0	0	1	0	0	1	#NULL!	0	3838	3838	3838	120
6338715	21.09.2005	51	0	1	0.67	156	88	132.919	0	0	1	1	0.5	0	0	0	0	0	1	1	1	1	0	0	1	0	1	2	3	1	1	0	2	35	0	0	1	0	0	1	0	0	1	#NULL!	0	2690	2690	2690	161
31210077	26.11.2008	58	0	1	0.68	182	109	127.298	0	0	1	1	2	0	0	0	0	0	1	1	1	1	1	0	1	0	1	0	3	0	1	0	1	45	0	0	1	0	0	1	0	0	1	#NULL!	0	1528	1528	1528	94
68854	06.11.2001	52	0	1	1	#NULL!	#NULL!	83.3997	1	0	1	1	1.5	0	0	0	0	1	0	1	1	1	0	0	1	0	1	0	3	0	1	1	2	30	0	1	1	0	1	1	0	1	1	#NULL!	0	4105	4105	272	272
2755278	02.10.2008	38	0	1	0.8	177	80	114.988	0	0	1	1	10	0	0	0	0	0	0	0	1	0	0	0	1	0	1	0	3	0	1	0	2	35	0	1	1	0	1	1	0	1	1	#NULL!	0	1583	1583	98	98
786728	11.08.2002	84	2	1	1.3	170	70	55.8977	2	3	1	1	8	1	0	0	0	0	1	0	0	1	1	0	1	0	1	2	3	0	1	1	2	25	0	1	1	0	1	1	0	1	1	#NULL!	0	3827	3827	125	125
4683981	08.02.2004	79	2	1	0.8	164	80	99.1126	0	0	1	1	9	1	1	0	0	0	0	1	0	0	0	0	3	2	1	0	3	0	1	1	3	25	0	1	1	0	1	1	0	1	1	#NULL!	1	3281	3281	88	88
4211606	01.10.2007	75	2	2	0.9	170	70	65.1382	1	0	1	1	1	0	0	0	0	0	1	0	1	1	0	0	1	0	1	3	3	0	1	1	0	55	0	0	1	0	0	1	0	0	1	#NULL!	0	1950	1950	1950	157
7681993	21.06.2004	61	0	1	0.8	170	61	104.454	0	0	1	1	1.5	0	0	0	0	0	0	0	1	1	0	0	1	0	1	0	3	0	1	1	0	55	0	0	1	0	0	1	0	0	1	#NULL!	0	3147	3147	3147	140
3036677	19.08.2003	60	0	1	1.1	182	115	72.574	1	0	1	1	0.75	0	0	0	0	1	0	1	0	1	0	0	3	2	1	0	3	0	1	0	0	45	0	0	1	0	0	1	0	0	1	#NULL!	1	3454	3454	3454	67
796063	09.01.2007	76	2	2	0.68	155	62	89.4121	1	0	1	1	6.5	0	0	0	0	0	0	1	0	0	0	0	1	0	1	0	3	0	1	1	2	35	0	1	1	0	1	1	0	1	1	#NULL!	0	2215	2215	125	125
7275763	11.02.2007	60	0	1	1.03	170	79	78.295	1	0	1	1	2.5	1	1	0	0	1	1	1	1	1	0	0	1	0	1	3	3	0	1	1	0	55	0	1	1	0	1	1	0	1	1	05.07.2012	0	2182	1971	128	128
737901	11.08.2004	54	0	2	1	154	55	61.4103	1	0	1	1	5	0	0	0	0	1	0	0	0	0	0	0	1	0	1	0	2	0	0	1	0	50	0	0	1	0	0	1	0	0	1	#NULL!	0	3096	3096	3096	143
31923618	12.08.2003	43	0	2	0.8	#NULL!	#NULL!	83.2064	1	0	1	1	4	0	0	0	0	1	1	0	0	0	0	0	1	0	1	2	3	0	1	0	1	50	0	0	1	0	0	1	0	0	1	#NULL!	0	3461	3461	3461	195
703850	06.02.2005	65	0	1	0.69	180	95	122.309	0	0	3	1	#NULL!	0	0	0	0	0	1	0	0	0	0	0	1	0	1	3	3	0	1	1	0	55	0	0	1	0	0	1	0	0	1	#NULL!	0	2917	2917	2917	87
2756279	01.10.2007	36	0	1	0.86	172	72	110.244	0	0	2	1	0.5	1	1	0	0	1	0	0	1	1	0	0	1	0	1	1	3	0	1	1	0	55	0	1	1	0	1	1	0	1	1	#NULL!	0	1950	1950	188	188
775852	07.01.2010	74	2	2	0.71	165	83	85.5285	1	0	1	1	1	0	0	0	0	0	1	0	0	1	0	0	1	0	1	3	3	0	1	0	2	35	0	0	1	0	0	1	0	0	1	#NULL!	0	1121	1121	1121	153
6397533	01.06.2003	46	0	2	0.7	172	62	95.7489	0	0	1	1	2	0	0	0	0	0	1	0	1	1	0	0	1	0	1	3	3	0	1	1	1	45	0	0	1	0	0	1	0	0	1	#NULL!	0	3533	3533	3533	150
435383	05.08.2001	59	0	1	1.4	#NULL!	#NULL!	55.1313	2	3	1	1	1	0	0	0	0	0	1	1	0	1	0	0	1	0	1	0	3	0	1	0	1	42	0	0	1	0	0	1	0	0	0	#NULL!	0	4198	4198	4198	4198
4154952	26.05.2005	86	2	2	1.41	#NULL!	70	37.585	1	3	1	3	#NULL!	0	0	0	0	0	1	0	0	0	0	0	1	0	1	0	3	0	1	0	2	35	0	0	0	0	0	0	1	0	1	11.09.2007	0	2808	838	2808	838
3517924	22.05.2004	58	0	2	0.5	160	58	134.688	0	0	2	2	12	0	0	0	1	0	1	0	0	0	0	0	2	0	3	3	3	0	1	0	1	45	0	0	0	1	0	1	1	0	1	02.12.2006	1	3177	924	3177	924
493576	29.11.2004	89	2	1	1.03	170	70	72.2724	1	0	2	2	4	0	0	0	0	0	0	0	0	0	0	0	1	0	3	0	3	0	1	0	1	45	0	0	0	0	0	0	1	0	1	04.02.2007	0	2986	797	2986	797
2708716	24.04.2008	63	0	1	0.99	170	114	81.1491	1	0	1	2	12	0	0	0	0	0	0	0	0	1	0	0	1	0	1	0	2	1	0	1	3	25	0	0	0	0	0	0	1	0	1	12.04.2011	0	1744	1083	1744	1083
468395	17.07.2003	77	2	1	0.76	160	60	105.705	0	0	1	2	4	0	0	0	0	0	1	1	1	1	0	0	1	0	1	0	3	0	1	0	0	45	0	0	0	0	0	0	1	0	1	21.10.2006	0	3487	1192	3487	1192
254839	29.01.2008	83	2	1	1.1	170	75	67.9474	1	0	1	2	12	0	0	0	0	0	0	0	2	1	0	0	3	2	1	2	3	0	1	0	3	25	0	0	0	0	0	0	1	0	1	13.10.2010	1	1830	988	1830	988
3016352	30.05.2009	74	2	2	0.71	158	50	85.5285	1	0	1	2	2	0	0	0	0	0	0	1	2	1	1	0	3	2	1	0	3	0	1	1	2	35	0	1	1	1	1	1	1	1	1	06.08.2011	1	1343	798	110	110
234656	25.11.2000	69	2	1	#NULL!	#NULL!	#NULL!	#NULL!	#NULL!	#NULL!	2	1	4	0	0	0	0	0	0	0	1	0	0	0	2	0	3	0	3	#NULL!	1	0	#NULL!	#NULL!	0	0	0	1	0	1	1	0	1	29.11.2002	1	4451	734	4451	734
1335477	06.09.2010	66	2	2	0.89	168	80	67.4456	1	0	2	1	2	0	0	0	0	0	0	1	2	0	0	0	1	0	3	0	3	0	1	0	1	45	0	0	0	1	0	1	1	0	1	23.09.2011	0	879	382	879	382
2461697	29.04.2002	73	2	1	1.6	180	72	45.2589	2	3	2	1	1	0	0	0	0	1	0	0	0	1	1	0	1	0	3	0	3	0	1	0	2	30	0	0	0	1	0	1	1	0	1	13.09.2004	0	3931	868	3931	868
1226975	08.02.2004	56	0	1	0.7	167	77	123.99	0	0	2	1	10	0	0	0	0	1	0	1	1	0	0	0	1	0	3	0	3	0	1	1	0	50	0	0	0	1	0	1	1	0	1	27.09.2005	0	3281	597	3281	597
237698	01.08.2003	74	2	1	0.81	160	65	99.0073	0	0	2	1	2	0	0	0	0	0	0	1	1	1	1	0	3	2	3	1	3	0	1	1	2	30	0	0	0	0	0	0	1	0	1	29.08.2006	1	3472	1124	3472	1124
5093120	06.12.2006	55	0	1	0.71	180	80	122.424	0	0	2	1	10	0	0	0	0	1	1	0	0	0	0	0	3	2	3	0	3	0	1	0	1	45	0	0	0	1	0	1	1	0	1	04.04.2008	1	2249	485	2249	485
5064300	12.10.2003	50	0	1	0.9	175	76	94.935	0	0	2	1	1	0	0	0	0	0	0	0	1	0	0	0	1	0	3	0	3	0	1	0	0	45	0	0	0	0	0	0	1	0	1	17.08.2006	0	3400	1040	3400	1040
145682	16.10.2001	71	2	1	1	#NULL!	#NULL!	78.2902	1	0	2	1	1.5	0	0	0	0	0	0	1	1	1	0	0	2	0	3	0	3	0	1	1	#NULL!	#NULL!	0	0	0	0	0	0	1	0	1	24.12.2004	1	4126	1165	4126	1165
30370351	26.08.2000	56	0	1	#NULL!	#NULL!	#NULL!	#NULL!	#NULL!	#NULL!	2	1	3	0	0	0	0	0	1	1	0	1	0	0	1	0	2	2	3	#NULL!	1	0	#NULL!	#NULL!	0	0	0	0	0	0	1	0	1	29.03.2003	0	4542	945	4542	945
387054	18.11.2008	61	0	1	1.04	171	80	77.1675	1	0	3	1	3	0	0	0	0	0	0	1	2	1	0	0	1	0	2	0	3	0	1	0	0	55	0	0	0	0	0	0	1	0	1	04.05.2011	0	1536	897	1536	897
503077	23.12.2004	73	2	2	0.83	151	55	71.622	1	0	2	1	3	0	0	0	0	1	0	0	2	0	0	0	3	2	2	0	3	0	1	1	2	30	0	0	0	0	0	0	1	0	1	16.10.2007	1	2962	1027	2962	1027
5380469	24.06.2004	48	0	1	1.4	160	88	57.4896	2	3	2	1	10	0	0	0	0	1	1	1	2	1	0	0	1	0	2	0	3	0	1	1	2	30	0	0	0	1	0	1	1	0	1	09.09.2005	0	3144	442	3144	442
125922	08.12.2000	77	2	2	#NULL!	#NULL!	#NULL!	#NULL!	#NULL!	#NULL!	1	1	8	0	0	0	0	0	0	0	0	0	0	0	1	0	1	0	3	#NULL!	1	0	#NULL!	#NULL!	0	0	0	1	0	1	1	0	1	12.12.2002	0	4438	734	4438	734
789883	07.03.2010	91	2	2	1.4	160	54	37.4628	2	3	1	1	12	0	0	0	0	0	0	0	0	0	1	0	1	0	1	0	2	0	1	0	2	35	0	0	0	0	0	0	1	0	1	10.01.2013	0	1062	1040	1062	1040
112615	16.03.2006	74	2	1	0.76	160	75	106.561	0	0	1	1	5	0	0	0	0	1	0	0	2	0	0	0	1	0	1	2	3	0	1	0	1	45	0	0	0	0	0	0	1	0	1	14.06.2008	0	2514	821	2514	821
3002128	04.12.2005	76	2	2	0.59	160	85	105.329	0	0	1	1	2	0	0	0	0	0	1	1	0	1	0	0	1	0	1	0	3	0	1	0	1	45	0	0	0	1	1	1	1	1	1	26.07.2007	0	2616	599	595	595
6754882	06.12.2005	72	2	1	1.01	165	80	77.1769	1	0	1	1	1	0	0	0	0	0	0	0	0	1	0	0	1	0	1	3	3	0	1	0	1	45	0	0	0	0	0	0	1	0	1	09.09.2008	0	2614	1008	2614	1008
4154611	23.01.2007	78	2	1	0.85	165	80	92.6549	0	0	1	1	12	0	0	0	0	0	0	1	1	0	0	0	2	0	1	3	3	0	1	1	2	35	0	0	0	1	0	1	1	0	1	30.08.2008	1	2201	585	2201	585
31170813	11.02.2010	83	2	1	1.07	170	70	70.1506	1	0	1	1	2	0	0	0	0	0	0	1	0	0	1	0	1	0	1	0	3	0	1	0	2	35	0	0	0	0	0	0	1	0	1	09.03.2012	0	1086	757	1086	757
3028217	31.03.2002	75	2	1	1.47	#NULL!	75	49.6354	2	3	1	1	4	0	0	0	0	0	1	1	2	1	1	0	1	0	1	3	3	0	1	0	0	45	0	0	1	1	0	1	1	0	1	01.02.2004	0	3960	672	3960	92
31208102	02.10.2008	82	2	1	1.33	170	62	54.7122	2	3	1	1	8	0	0	0	0	0	1	1	0	1	0	0	3	2	1	0	3	0	1	0	2	35	0	0	1	1	0	1	1	0	1	16.03.2010	1	1583	530	1583	145
5490062	05.06.2007	50	0	1	0.75	187	110	117.166	0	0	2	3	1	1	0	0	0	0	0	0	2	1	0	0	1	0	3	0	3	0	1	1	2	35	1	0	1	1	0	1	1	0	1	26.08.2007	0	2068	82	2068	82
6456449	28.10.2008	59	0	1	0.9	181	82	91.7982	0	0	1	3	2	0	0	0	0	1	1	0	0	0	0	0	1	0	1	2	3	0	1	1	2	35	1	0	1	1	0	1	1	0	1	03.03.2009	0	1557	126	1557	126
364416	24.03.2004	68	2	1	0.9	170	70	89.1903	1	0	1	2	0	0	0	0	0	0	0	0	1	0	0	0	1	0	1	0	3	0	1	1	2	30	1	0	1	1	0	1	1	0	1	22.09.2005	0	3236	547	3236	547
5137792	02.10.2004	52	0	1	0.96	165	70	87.4225	1	0	1	2	1	0	1	0	0	0	0	0	1	0	0	0	1	0	1	0	0	#NULL!	0	0	3	25	1	0	1	1	0	1	1	0	1	28.10.2005	0	3044	391	3044	391
1066551	28.09.2003	68	2	1	1	170	82	78.9794	1	0	2	2	2	0	0	0	0	0	0	0	1	0	0	1	1	0	3	2	3	0	1	0	1	45	1	0	1	1	0	1	1	0	1	21.02.2004	0	3414	146	3414	146
4721932	17.11.2002	77	2	2	0.7	#NULL!	#NULL!	86.2415	1	0	1	2	#NULL!	1	0	0	0	0	0	0	1	1	1	0	1	0	1	0	3	0	1	1	2	30	1	1	1	1	1	1	1	1	1	10.04.2003	0	3729	144	143	143
34799	29.03.2003	55	0	1	1	170	60	82.4554	1	0	2	1	5	0	0	0	0	1	0	0	1	0	0	0	1	0	3	0	3	0	1	1	2	30	1	0	1	1	0	1	1	0	1	16.05.2004	0	3597	414	3597	414
6496156	04.09.2010	72	2	1	1.25	173	78	60.3449	1	0	1	1	3	1	1	0	0	0	1	1	1	1	0	0	1	0	3	0	3	0	1	1	2	35	1	0	1	1	0	1	1	0	1	25.07.2011	0	881	324	881	324
4158410	08.07.2000	75	2	1	#NULL!	#NULL!	#NULL!	#NULL!	#NULL!	#NULL!	1	1	3	0	0	0	0	0	0	0	1	0	0	0	1	0	1	0	3	#NULL!	1	1	2	30	1	0	1	1	0	1	1	0	1	02.04.2001	0	4591	268	4591	268
6720326	07.06.2007	66	2	2	0.67	154	66	93.9748	0	0	1	1	4	0	0	0	0	0	0	1	2	1	1	0	1	0	1	0	2	1	0	0	3	25	1	0	1	1	0	1	1	0	1	24.02.2008	0	2066	262	2066	262
4886912	18.03.2000	79	2	2	1.3	160	60	41.996	2	3	2	1	7	0	0	0	0	0	1	1	0	0	1	0	1	0	3	0	3	#NULL!	1	0	2	40	1	1	1	1	1	1	1	1	1	26.06.2000	0	4703	100	94	94
145683	23.02.2000	68	2	1	#NULL!	#NULL!	#NULL!	#NULL!	#NULL!	#NULL!	2	1	3	0	0	0	0	0	1	1	1	1	0	0	1	0	3	0	3	#NULL!	1	0	#NULL!	#NULL!	1	1	1	1	1	1	1	1	1	06.05.2000	0	4727	73	55	55
31059852	22.09.2007	70	2	2	1	165	58	58.4944	2	3	2	1	2.5	0	0	0	0	0	0	0	0	0	0	0	1	0	3	0	3	0	1	0	2	35	1	0	1	1	0	1	1	0	1	08.12.2007	0	1959	77	1959	77
30771158	15.07.2006	53	0	1	0.72	183	100	121.373	0	0	1	1	4	0	0	0	0	0	0	0	1	0	0	0	1	0	1	2	3	0	1	1	2	35	1	0	1	1	0	1	1	0	1	04.11.2006	0	2393	112	2393	112
7612401	02.03.2005	76	2	2	1.19	165	78	46.8738	2	3	1	1	#NULL!	0	0	0	0	0	1	1	0	1	0	0	1	0	1	0	3	0	1	1	3	25	1	1	1	1	1	1	1	1	1	15.05.2005	0	2893	74	67	67
30620029	15.02.2003	83	2	2	0.99	#NULL!	75	56.9352	2	3	1	1	4	0	0	0	0	0	1	1	0	0	0	0	1	0	1	0	0	1	0	#NULL!	2	35	1	0	1	1	0	1	1	0	1	27.07.2003	0	3639	162	3639	162
1637779	21.08.2004	85	2	1	1	150	56	75.4816	1	0	1	1	4	0	0	0	0	0	0	1	0	0	0	0	1	0	1	0	2	0	0	0	3	25	1	0	1	1	0	1	1	0	1	18.11.2004	0	3086	89	3086	89
8000391220	25.09.2003	33	0	1	0.8	180	55	118.328	0	0	1	1	4	0	0	0	0	0	0	0	1	0	0	0	1	0	1	0	3	0	1	1	3	30	1	1	1	1	1	1	1	1	1	09.09.2004	0	3417	350	67	67
[truncated: 10 more columns]
